# Supplementary material for: Diversity and conservation of mammals in indigenous territories of southern Mexico: proposal for an “Archipelago Reserve”
Source: PeerJ. 2023 Nov 7;11:e16345. doi: 10.7717/peerj.16345 (PMC10637252; doi:10.7717/peerj.16345)
Supplement: Supplemental Information 1 [file peerj-11-16345-s001.xlsx]

## Sheet: Hoja1
Claves: Size/class: S=small, B=bats, M-L=medium-large; Record type: D=Database, C=Collection, L=Literature, CM=Community monitoring; Zone 1= 0-400 masl, Zone 2= 401-1000 masl, Zone 3= 1001-1500 masl, Zone 4= >1501 masl; Vegetation: MCF= Montane cloud forest, TRF = Tropical raiforest, P-OF= Pine-oak forest, SDTF= Sub-deciduous tropical forest, A= Agriculture, PAS= Pastures; Year: Year of first and…

## Sheet: Hoja3
	Etiquetas de columna
Etiquetas de fila	MG	Total general
BD
C
L
MC
Bassariscus sumichrasti
Caluromys debianus
Canis latrans
Conepatus semistriatus
Cuniculus paca
Dasyprocta mexicana
Dasypus novemcinctus
Dicotyles angulatus
Eira barbara
Galictis vittata
Leopardus pardalis
Leopardus wiedii
Mazama temama
Mephitis macroura
Mustela frenata
Nasua narica
ND
Panthera onca
Philander opossum
Potos flavus
Procyon lotor
Puma concolor
Puma yagouaroundi
Sciurus aureogaster
Sciurus deppei
Sylvilagus
Tamandua mexicana
Total general

## Sheet: Hoja4
BD	B	S	M		C	B	S	M		L	B	S	M		CM	B	S	M
	45	38	20			24	23	25			17	8	30					26
	Anoura geoffroyi	Cryptotis goldmani	Ateles geoffroyi			Anoura geoffroyi	Cryptotis mexicana	Basariscus astutus			Anoura geoffroyi	Handleyomys chapmani	Ateles geoffroyi					Bassariscus sumichrasti
	Artibeus jamaicensis	Cryptotis magna	Bassariscus sumichrasti			Artibeus jamaicensis	Cryptotis parva	Canis latrans			Artibeus jamaicensis	Heteromys desmarestianus	Basariscus astutus					Caluromys debianus
	Artibeus lituratus	Cryptotis mexicana	Cuniculus paca			Artibeus lituratus	Habromys chinanteco	Cuniculus paca			Balantiopteryx io	Heteromys irroratus	Canis latrans					Canis latrans
	Balantiopteryx io	Habromys chinanteco	Dasyprocta mexicana			Balantiopteryx plicata	Habromys ixtlani	Dasyprocta mexicana			Balantiopteryx plicata	Oligoryzomys fulvescens	Conepatus leuconotus					Conepatus semistriatus
	Balantiopteryx plicata	Habromys ixtlani	Didelphis marsupialis			Carollia perspicillata	Handleyomys chapmani	Dasypus novemcinctus			Carollia sowelli	Peromyscus aztecus	Conepatus semistriatus					Cuniculus paca
	Carollia perspicillata	Habromys lepturus	Didelphis virginiana			Carollia subrufa	Heteromys desmarestianus	Dicotyles angulatus			Centurio senex	Peromyscus mexicanus	Cuniculus paca					Dasyprocta mexicana
	Carollia sowelli	Handleyomys alfaroi	Eira barbara			Centurio senex	Heteromys irroratus	Didelphis marsupialis			Dermanura tolteca	Sigmodon hispidus	Dasyprocta mexicana					Dasypus novemcinctus
	Carollia subrufa	Handleyomys chapmani	Mazama temama			Choeroniscus godmani	Marmosa mexicana	Didelphis virginiana			Desmodus rotundus	Tylomys nudicaudus	Dasypus novemcinctus					Dicotyles angulatus
	Centurio senex	Handleyomys melanotis	Mustela frenata			Dermanura phaeotis	Megadontomys cryophilus	Eira barbara			Enchisthenes hartii		Dicotyles angulatus					Eira barbara
	Chiroderma villosum	Handleyomys rostratus	ND			Desmodus rotundus	Microtus mexicanus	Leopardus pardalis			Glossophaga soricina		Didelphis marsupialis					Galictis vittata
	Chrotopterus auritus	Heteromys desmarestianus	Orthogeomys grandis			Diclidurus albus	Microtus oaxacensis	Leopardus wiedii			Mimon cozumelae		Didelphis virginiana					Leopardus pardalis
	Dermanura phaeotis	Marmosa mexicana	Panthera onca			Eptesicus furinalis	ND	Mazama temama			Phyllostomus discolor		Eira barbara					Leopardus wiedii
	Dermanura tolteca	Megadontomys cryophilus	Philander opossum			Glossophaga commissarisi	Oligoryzomys fulvescens	Mephitis macroura			Sturnira hondurensis		Leopardus pardalis					Mazama temama
	Desmodus rotundus	Microtus mexicanus	Potos flavus			Glossophaga leachii	Peromyscus aztecus	Mustela frenata			Sturnira parvidens		Leopardus wiedii					Mephitis macroura
	Eptesicus furinalis	Microtus oaxacensis	Procyon lotor			Glossophaga morenoi	Peromyscus beatae	Nasua narica			Vampyressa thyone		Lontra longicaudis					Mustela frenata
	Glossophaga commissarisi	ND	Puma yagouaroundi			Glossophaga soricina	Peromyscus gratus	Odocoileus virginianus			Vampyrodes major		Lynx rufus					Nasua narica
	Glossophaga leachii	Nyctomys sumichrasti	Sciurus aureogaster			Lasiurus cinereus	Peromyscus levipes	Panthera onca			Vampyrum spectrum		Mazama temama					ND
	Glossophaga soricina	Oligoryzomys fulvescens	Sciurus deppei			Leptonycteris yerbabuenae	Peromyscus melanocarpus	Procyon lotor					Nasua narica					Panthera onca
	Hylonycteris underwoodi	Oryzomys couesi	Sphiggurus mexicanus			Myotis nigricans	Peromyscus mexicanus	Puma concolor					Orthogeomys hispidus					Philander opossum
	Lasiurus intermedius	Peromyscus aztecus	Sylvilagus brasiliensis			Pteronotus parnellii	Reithrodontomys mexicanus	Sciurus aureogaster					Panthera onca					Potos flavus
	Lasiurus xanthinus	Peromyscus beatae	Tamandua mexicana			Saccopteryx bilineata	Reithrodontomys microdon	Sciurus deppei					Potos flavus					Procyon lotor
	Leptonycteris yerbabuenae	Peromyscus furvus				Sturnira hondurensis	Reithrodontomys sumichrasti	Sphiggurus mexicanus					Procyon lotor					Puma concolor
	Micronycteris microtis	Peromyscus levipes				Sturnira parvidens	Sorex veraecrucis	Spilogale angustifron					Puma concolor					Puma yagouaroundi
	Molossus aztecus	Peromyscus maniculatus				Uroderma bilobatum	Sorex veraepacis	Sylvilagus floridanus					Puma yagouaroundi					Sciurus aureogaster
	Molossus rufus	Peromyscus melanocarpus						Urocyon cinereoargenteus					Sciurus aureogaster					Sciurus deppei
	Mormoops megalophylla	Peromyscus mexicanus											Sphiggurus mexicanus					Sylvilagus
	Myotis keaysi	Reithrodontomys fulvescens											Sylvilagus floridanus					Tamandua mexicana
	Myotis nigricans	Reithrodontomys mexicanus											Tamandua mexicana
	Myotis volans	Reithrodontomys microdon											Tapirella bairdii
	ND	Reithrodontomys sumichrasti											Urocyon cinereoargenteus
	Perimyotis subflavus	Sigmodon hispidus
	Peropteryx macrotis	Sigmodon mascotensis
	Phyllostomus discolor	Sigmodon toltecus
	Platyrrhinus helleri	Sorex macrodon
	Pteronotus davyi	Sorex saussurei
	Pteronotus parnellii	Sorex ventralis
	Pteronotus personatus	Sorex veraecrucis
	Rhynchonycteris naso	Sorex veraepacis
	Saccopteryx bilineata	Tylomys nudicaudus
	Sturnira hondurensis
	Sturnira parvidens
	Tadarida brasiliensis
	Trachops cirrhosus
	Uroderma bilobatum
	Vampyrodes major
	Vampyrum spectrum

## Sheet: Hoja2
Orden	Family	Genus	Species	Name	Size	Record	Record_type	Year	Municipality	Zone	Vegetation
Primates	Atelidae	Ateles	geoffroyi	Ateles geoffroyi	M-L	Revista Mexicana de Biodiversidad	D	2006	Santiago Comaltepec	3	MCF
Carnivora	Procyonidae	Bassariscus	sumichrasti	Bassariscus sumichrasti	M-L	American Museum of Natural History	D	1969	Santiago Comaltepec	3	MCF
Didelphimorphia	Didelphidae	Didelphis	virginiana	Didelphis virginiana	M-L	Biodiversity Institute and Natural History Museum, University of Kansas	D	1901	Santiago Comaltepec	3	MCF
Carnivora	Felidae	Panthera	onca	Panthera onca	M-L	Cat News	D	2007	San Felipe Usila	3	MCF
Carnivora	Felidae	Panthera	onca	Panthera onca	M-L	Cat News	D	2008	San Felipe Usila	3	MCF
Carnivora	Felidae	Panthera	onca	Panthera onca	M-L	Revista Mexicana de Biodiversidad	D	2012	Santiago Comaltepec	2	MCF
Carnivora	Felidae	Panthera	onca	Panthera onca	M-L	Revista Mexicana de Biodiversidad	D	2012	Santiago Comaltepec	2	MCF
Didelphimorphia	Didelphidae	Philander	opossum	Philander opossum	M-L	University of Kansas, Museum of Natural History	D	1981	Santiago Comaltepec	3	MCF
Rodentia	Sciuridae	Sciurus	aureogaster	Sciurus aureogaster	M-L	Registro Bibliografico R Hall	D	1981	San Juan Bautista Valle Nacional	3	MCF
Rodentia	Sciuridae	Sciurus	deppei	Sciurus deppei	M-L	University of Kansas, Museum of Natural History	D	1964	Santiago Comaltepec	2	MCF
Rodentia	Sciuridae	Sciurus	deppei	Sciurus deppei	M-L	University of Kansas, Museum of Natural History	D	1964	Santiago Comaltepec	3	MCF
Carnivora	Procyonidae	Bassariscus	sumichrasti	Bassariscus sumichrasti	M-L	American Museum of Natural History	D		Santiago Comaltepec	3	P-OF
Didelphimorphia	Didelphidae	Didelphis	virginiana	Didelphis virginiana	M-L	University of Kansas, Museum of Natural History	D	1964	Santiago Comaltepec	3	P-OF
Artiodactyla	Cervidae	Mazama	temama	Mazama temama	M-L	Coleccion Nacional de Mamiferos, Instituto de Biologia, UNAM	D	9999	Santiago Comaltepec	4	P-OF
Rodentia	Sciuridae	Sciurus	ND	ND	M-L	American Museum of Natural History	D	1961	San Pedro Yolox	4	P-OF
Lagomorpha	Leporidae	Sylvilagus	ND	ND	M-L	American Museum of Natural History	D	1968	Santiago Comaltepec	4	P-OF
Rodentia	Geomyidae	Orthogeomys	grandis	Orthogeomys grandis	M-L	Bulletin of The American Museum of Natural History	D	1969	Santiago Comaltepec	4	P-OF
Rodentia	Geomyidae	Orthogeomys	grandis	Orthogeomys grandis	M-L	Registro Bibliografico R Hall	D	1981	Santiago Comaltepec	4	P-OF
Carnivora	Procyonidae	Potos	flavus	Potos flavus	M-L	University of Kansas, Museum of Natural History	D	1964	Santiago Comaltepec	3	P-OF
Rodentia	Sciuridae	Sciurus	aureogaster	Sciurus aureogaster	M-L	University of Kansas, Museum of Natural History	D	1970	Santiago Comaltepec	3	P-OF
Rodentia	Sciuridae	Sciurus	deppei	Sciurus deppei	M-L	Coleccion Nacional de Mamiferos, Instituto de Biologia, UNAM	D	1964	Santiago Comaltepec	3	P-OF
Rodentia	Sciuridae	Sciurus	deppei	Sciurus deppei	M-L	Museo de Zoologia Alfonso L. Herrera, Facultad de Ciencias, UNAM	D	1987	Santiago Comaltepec	4	P-OF
Rodentia	Sciuridae	Sciurus	deppei	Sciurus deppei	M-L	Museo de Zoologia Alfonso L. Herrera, Facultad de Ciencias, UNAM	D	1988	Santiago Comaltepec	4	P-OF
Rodentia	Sciuridae	Sciurus	deppei	Sciurus deppei	M-L	University of Kansas, Museum of Natural History	D	1964	Santiago Comaltepec	3	P-OF
Rodentia	Sciuridae	Sciurus	deppei	Sciurus deppei	M-L	Bulletin of The American Museum of Natural History	D	1969	Santiago Comaltepec	4	P-OF
Rodentia	Sciuridae	Sciurus	deppei	Sciurus deppei	M-L	Bulletin of The American Museum of Natural History	D	1969	Santiago Comaltepec	4	P-OF
Rodentia	Cuniculidae	Cuniculus	paca	Cuniculus paca	M-L	University of Kansas, Museum of Natural History	D	1964	San Juan Bautista Valle Nacional	2	TRF
Rodentia	Dasyproctidae	Dasyprocta	mexicana	Dasyprocta mexicana	M-L	Coleccion Nacional de Mamiferos, Instituto de Biologia, UNAM	D	1947	San Jose Chiltepec	1	TRF
Didelphimorphia	Didelphidae	Didelphis	marsupialis	Didelphis marsupialis	M-L	University of Kansas, Museum of Natural History	D	1964	San Juan Bautista Valle Nacional	2	TRF
Didelphimorphia	Didelphidae	Didelphis	marsupialis	Didelphis marsupialis	M-L	Bulletin of The American Museum of Natural History	D	1969	San Juan Bautista Valle Nacional	1	TRF
Didelphimorphia	Didelphidae	Didelphis	marsupialis	Didelphis marsupialis	M-L	Registro Bibliografico R Hall	D	1981	San Juan Bautista Valle Nacional	2	TRF
Didelphimorphia	Didelphidae	Didelphis	virginiana	Didelphis virginiana	M-L	Museo de Zoologia Alfonso L. Herrera, Facultad de Ciencias, UNAM	D	1987	Santiago Comaltepec	3	TRF
Carnivora	Mustelidae	Eira	barbara	Eira barbara	M-L	American Museum of Natural History	D	1965	Santiago Comaltepec	3	TRF
Artiodactyla	Cervidae	Mazama	temama	Mazama temama	M-L	Registro Bibliografico R Hall	D	1981	San Lucas Ojitlan	1	TRF
Carnivora	Mustelidae	Mustela	frenata	Mustela frenata	M-L	Louisiana State University, Museum of Natural Science	D	1961	San Juan Bautista Valle Nacional	1	TRF
Carnivora	Procyonidae	Bassariscus	ND	ND	M-L	American Museum of Natural History	D	1968	Santiago Comaltepec	3	TRF
Carnivora	Felidae	Panthera	onca	Panthera onca	M-L	Revista Mexicana de Biodiversidad	D	2012	San Felipe Usila	1	TRF
Carnivora	Felidae	Panthera	onca	Panthera onca	M-L	Revista Mexicana de Biodiversidad	D	2012	San Felipe Usila	2	TRF
Carnivora	Felidae	Panthera	onca	Panthera onca	M-L	Revista Mexicana de Biodiversidad	D	2012	San Felipe Usila	2	TRF
Carnivora	Felidae	Panthera	onca	Panthera onca	M-L	Revista Mexicana de Biodiversidad	D	2012	Santiago Jocotepec	1	TRF
Didelphimorphia	Didelphidae	Philander	opossum	Philander opossum	M-L	Bulletin of The American Museum of Natural History	D	1969	San Jose Chiltepec	1	TRF
Didelphimorphia	Didelphidae	Philander	opossum	Philander opossum	M-L	Registro Bibliografico R Hall	D	1981	San Lucas Ojitlan	1	TRF
Carnivora	Procyonidae	Procyon	lotor	Procyon lotor	M-L	Coleccion Nacional de Mamiferos, Instituto de Biologia, UNAM	D	9999	San Juan Bautista Valle Nacional	1	TRF
Carnivora	Procyonidae	Procyon	lotor	Procyon lotor	M-L	University of Kansas, Museum of Natural History	D	1964	San Juan Bautista Valle Nacional	2	TRF
Carnivora	Felidae	Puma	yagouaroundi	Puma yagouaroundi	M-L	Bulletin of The American Museum of Natural History	D	1969	San Jose Chiltepec	1	TRF
Rodentia	Sciuridae	Sciurus	aureogaster	Sciurus aureogaster	M-L	Bulletin of The American Museum of Natural History	D	1969	San Jose Chiltepec	1	TRF
Rodentia	Sciuridae	Sciurus	aureogaster	Sciurus aureogaster	M-L	Registro Bibliografico R Hall	D	1981	San Pedro Yolox	2	TRF
Rodentia	Sciuridae	Sciurus	deppei	Sciurus deppei	M-L	University of Michigan, Museum of Zoology	D	1968	San Juan Bautista Valle Nacional	2	TRF
Rodentia	Erethizontidae	Sphiggurus	mexicanus	Sphiggurus mexicanus	M-L	Coleccion Nacional de Mamiferos, Instituto de Biologia, UNAM	D	1992	San Juan Lana	1	TRF
Lagomorpha	Leporidae	Sylvilagus	brasiliensis	Sylvilagus brasiliensis	M-L	University of Kansas, Museum of Natural History	D	1964	San Juan Bautista Valle Nacional	1	TRF
Pilosa	Myrmecophagidae	Tamandua	mexicana	Tamandua mexicana	M-L	Coleccion Nacional de Mamiferos, Instituto de Biologia, UNAM	D	1990	Santiago Comaltepec	2	TRF
Artiodactyla	Cervidae	Mazama	temama	Mazama temama	M-L	Bulletin of The American Museum of Natural History	D	1969	San Lucas Ojitlan	1	SDTF
Didelphimorphia	Didelphidae	Philander	opossum	Philander opossum	M-L	American Museum of Natural History	D	1962	San Jose Chiltepec	1	SDTF
Didelphimorphia	Didelphidae	Philander	opossum	Philander opossum	M-L	Bulletin of The American Museum of Natural History	D	1969	San Jose Chiltepec	1	SDTF
Carnivora	Felidae	Puma	yagouaroundi	Puma yagouaroundi	M-L	American Museum of Natural History	D	1962	San Jose Chiltepec	1	SDTF
Carnivora	Felidae	Puma	yagouaroundi	Puma yagouaroundi	M-L	Bulletin of The American Museum of Natural History	D	1969	San Jose Chiltepec	1	SDTF
Rodentia	Sciuridae	Sciurus	aureogaster	Sciurus aureogaster	M-L	American Museum of Natural History	D	1962	San Jose Chiltepec	1	SDTF
Rodentia	Sciuridae	Sciurus	aureogaster	Sciurus aureogaster	M-L	Bulletin of The American Museum of Natural History	D	1969	San Jose Chiltepec	1	SDTF
Soricomorpha	Soricidae	Cryptotis	magna	Cryptotis magna	S	American Museum of Natural History	D	1959	Santiago Comaltepec	3	MCF
Soricomorpha	Soricidae	Cryptotis	magna	Cryptotis magna	S	Coleccion Nacional de Mamiferos, Instituto de Biologia, UNAM	D	1986	Santiago Comaltepec	3	MCF
Soricomorpha	Soricidae	Cryptotis	magna	Cryptotis magna	S	Coleccion Nacional de Mamiferos, Instituto de Biologia, UNAM	D	1989	Santiago Comaltepec	3	MCF
Soricomorpha	Soricidae	Cryptotis	magna	Cryptotis magna	S	Coleccion Nacional de Mamiferos, Instituto de Biologia, UNAM	D	1989	Santiago Comaltepec	3	MCF
Soricomorpha	Soricidae	Cryptotis	magna	Cryptotis magna	S	Coleccion Nacional de Mamiferos, Instituto de Biologia, UNAM	D	1989	Santiago Comaltepec	3	MCF
Soricomorpha	Soricidae	Cryptotis	magna	Cryptotis magna	S	Coleccion Nacional de Mamiferos, Instituto de Biologia, UNAM	D	1989	Santiago Comaltepec	3	MCF
Soricomorpha	Soricidae	Cryptotis	magna	Cryptotis magna	S	Coleccion Nacional de Mamiferos, Instituto de Biologia, UNAM	D	1990	Santiago Comaltepec	3	MCF
Soricomorpha	Soricidae	Cryptotis	magna	Cryptotis magna	S	Coleccion Nacional de Mamiferos, Instituto de Biologia, UNAM	D	1991	Santiago Comaltepec	3	MCF
Soricomorpha	Soricidae	Cryptotis	magna	Cryptotis magna	S	The Field Museum	D	1989	Santiago Comaltepec	3	MCF
Soricomorpha	Soricidae	Cryptotis	magna	Cryptotis magna	S	Registro Bibliografico R Hall	D	1981	San Pedro Yolox	3	MCF
Soricomorpha	Soricidae	Cryptotis	mexicana	Cryptotis mexicana	S	American Museum of Natural History	D	1968	Santiago Comaltepec	3	MCF
Soricomorpha	Soricidae	Cryptotis	mexicana	Cryptotis mexicana	S	American Museum of Natural History	D	1972	Santiago Comaltepec	3	MCF
Soricomorpha	Soricidae	Cryptotis	mexicana	Cryptotis mexicana	S	Coleccion Nacional de Mamiferos, Instituto de Biologia, UNAM	D	1986	Santiago Comaltepec	3	MCF
Soricomorpha	Soricidae	Cryptotis	mexicana	Cryptotis mexicana	S	Coleccion Nacional de Mamiferos, Instituto de Biologia, UNAM	D	1989	Santiago Comaltepec	3	MCF
Soricomorpha	Soricidae	Cryptotis	mexicana	Cryptotis mexicana	S	Coleccion Nacional de Mamiferos, Instituto de Biologia, UNAM	D	1990	Santiago Comaltepec	3	MCF
Soricomorpha	Soricidae	Cryptotis	mexicana	Cryptotis mexicana	S	Coleccion Nacional de Mamiferos, Instituto de Biologia, UNAM	D	1990	Santiago Comaltepec	3	MCF
Soricomorpha	Soricidae	Cryptotis	mexicana	Cryptotis mexicana	S	University of Kansas, Museum of Natural History	D	1981	Santiago Comaltepec	3	MCF
Rodentia	Cricetidae	Habromys	ixtlani	Habromys ixtlani	S	Coleccion Nacional de Mamiferos, Instituto de Biologia, UNAM	D	1986	Santiago Comaltepec	3	MCF
Rodentia	Cricetidae	Habromys	ixtlani	Habromys ixtlani	S	Natural History Museum of Los Angeles County	D	1986	Santiago Comaltepec	3	MCF
Rodentia	Cricetidae	Habromys	ixtlani	Habromys ixtlani	S	Registro Bibliografico R Hall	D	1981	Santiago Comaltepec	3	MCF
Rodentia	Cricetidae	Habromys	lepturus	Habromys lepturus	S	Museo de Zoologia Alfonso L. Herrera, Facultad de Ciencias, UNAM	D	1987	Santiago Comaltepec	3	MCF
Rodentia	Cricetidae	Habromys	lepturus	Habromys lepturus	S	The Field Museum	D	1989	Santiago Comaltepec	3	MCF
Rodentia	Cricetidae	Habromys	lepturus	Habromys lepturus	S	The Field Museum	D		Santiago Comaltepec	3	MCF
Rodentia	Cricetidae	Handleyomys	alfaroi	Handleyomys alfaroi	S	Museo de Zoologia Alfonso L. Herrera, Facultad de Ciencias, UNAM	D	1987	Santiago Comaltepec	3	MCF
Rodentia	Cricetidae	Handleyomys	alfaroi	Handleyomys alfaroi	S	Museo de Zoologia Alfonso L. Herrera, Facultad de Ciencias, UNAM	D	1987	Santiago Comaltepec	3	MCF
Rodentia	Cricetidae	Handleyomys	alfaroi	Handleyomys alfaroi	S	Museo de Zoologia Alfonso L. Herrera, Facultad de Ciencias, UNAM	D	1987	Santiago Comaltepec	3	MCF
Rodentia	Cricetidae	Handleyomys	alfaroi	Handleyomys alfaroi	S	Texas Tech University, Museum of Texas Tech University	D	1974	Santiago Comaltepec	3	MCF
Rodentia	Cricetidae	Handleyomys	alfaroi	Handleyomys alfaroi	S	Texas Tech University, Museum of Texas Tech University	D	1974	Santiago Comaltepec	3	MCF
Rodentia	Cricetidae	Handleyomys	alfaroi	Handleyomys alfaroi	S	University of Kansas, Museum of Natural History	D	1964	Santiago Comaltepec	3	MCF
Rodentia	Cricetidae	Handleyomys	alfaroi	Handleyomys alfaroi	S	University of Kansas, Museum of Natural History	D	1964	Santiago Comaltepec	3	MCF
Rodentia	Cricetidae	Handleyomys	alfaroi	Handleyomys alfaroi	S	University of Kansas, Museum of Natural History	D	1964	Santiago Comaltepec	3	MCF
Rodentia	Cricetidae	Handleyomys	alfaroi	Handleyomys alfaroi	S	University of Kansas, Museum of Natural History	D	1975	Santiago Comaltepec	2	MCF
Rodentia	Cricetidae	Handleyomys	chapmani	Handleyomys chapmani	S	Coleccion Nacional de Mamiferos, Instituto de Biologia, UNAM	D	1989	Santiago Comaltepec	2	MCF
Rodentia	Cricetidae	Handleyomys	chapmani	Handleyomys chapmani	S	Coleccion Nacional de Mamiferos, Instituto de Biologia, UNAM	D	1989	Santiago Comaltepec	3	MCF
Rodentia	Cricetidae	Handleyomys	chapmani	Handleyomys chapmani	S	Coleccion Nacional de Mamiferos, Instituto de Biologia, UNAM	D	1989	Santiago Comaltepec	3	MCF
Rodentia	Cricetidae	Handleyomys	chapmani	Handleyomys chapmani	S	Coleccion Nacional de Mamiferos, Instituto de Biologia, UNAM	D	1989	Santiago Comaltepec	3	MCF
Rodentia	Cricetidae	Handleyomys	chapmani	Handleyomys chapmani	S	Coleccion Nacional de Mamiferos, Instituto de Biologia, UNAM	D	1989	Santiago Comaltepec	3	MCF
Rodentia	Cricetidae	Handleyomys	chapmani	Handleyomys chapmani	S	Coleccion Nacional de Mamiferos, Instituto de Biologia, UNAM	D	1990	Santiago Comaltepec	2	MCF
Rodentia	Cricetidae	Handleyomys	chapmani	Handleyomys chapmani	S	Coleccion Nacional de Mamiferos, Instituto de Biologia, UNAM	D	1990	Santiago Comaltepec	3	MCF
Rodentia	Cricetidae	Handleyomys	chapmani	Handleyomys chapmani	S	Coleccion Nacional de Mamiferos, Instituto de Biologia, UNAM	D	1990	Santiago Comaltepec	3	MCF
Rodentia	Cricetidae	Handleyomys	chapmani	Handleyomys chapmani	S	Coleccion Nacional de Mamiferos, Instituto de Biologia, UNAM	D	1991	Santiago Comaltepec	3	MCF
Rodentia	Cricetidae	Handleyomys	melanotis	Handleyomys melanotis	S	Diversidad y distribución mastofaunística en las regiones prioritarias para la conservación del estado de Oaxaca	D	1962	SANTIAGO COMALTEPEC	3	MCF
Rodentia	Cricetidae	Handleyomys	melanotis	Handleyomys melanotis	S	Diversidad y distribución mastofaunística en las regiones prioritarias para la conservación del estado de Oaxaca	D	1972	SANTIAGO COMALTEPEC	3	MCF
Rodentia	Heteromyidae	Heteromys	desmarestianus	Heteromys desmarestianus	S	American Museum of Natural History	D	1968	Santiago Comaltepec	3	MCF
Rodentia	Heteromyidae	Heteromys	desmarestianus	Heteromys desmarestianus	S	American Museum of Natural History	D		Santiago Comaltepec	3	MCF
Rodentia	Heteromyidae	Heteromys	desmarestianus	Heteromys desmarestianus	S	Coleccion Nacional de Mamiferos, Instituto de Biologia, UNAM	D	1989	Santiago Comaltepec	3	MCF
Rodentia	Heteromyidae	Heteromys	desmarestianus	Heteromys desmarestianus	S	Coleccion Nacional de Mamiferos, Instituto de Biologia, UNAM	D	1989	Santiago Comaltepec	3	MCF
Rodentia	Heteromyidae	Heteromys	desmarestianus	Heteromys desmarestianus	S	Coleccion Nacional de Mamiferos, Instituto de Biologia, UNAM	D	1989	Santiago Comaltepec	3	MCF
Rodentia	Heteromyidae	Heteromys	desmarestianus	Heteromys desmarestianus	S	Coleccion Nacional de Mamiferos, Instituto de Biologia, UNAM	D	1989	Santiago Comaltepec	3	MCF
Rodentia	Heteromyidae	Heteromys	desmarestianus	Heteromys desmarestianus	S	Coleccion Nacional de Mamiferos, Instituto de Biologia, UNAM	D	1989	Santiago Comaltepec	3	MCF
Rodentia	Heteromyidae	Heteromys	desmarestianus	Heteromys desmarestianus	S	Coleccion Nacional de Mamiferos, Instituto de Biologia, UNAM	D	1990	Santiago Comaltepec	3	MCF
Rodentia	Heteromyidae	Heteromys	desmarestianus	Heteromys desmarestianus	S	Museo de Zoologia Alfonso L. Herrera, Facultad de Ciencias, UNAM	D	1987	Santiago Comaltepec	3	MCF
Rodentia	Heteromyidae	Heteromys	desmarestianus	Heteromys desmarestianus	S	Museo de Zoologia Alfonso L. Herrera, Facultad de Ciencias, UNAM	D	1988	Santiago Comaltepec	2	MCF
Rodentia	Heteromyidae	Heteromys	desmarestianus	Heteromys desmarestianus	S	Museo de Zoologia Alfonso L. Herrera, Facultad de Ciencias, UNAM	D	1988	Santiago Comaltepec	3	MCF
Rodentia	Heteromyidae	Heteromys	desmarestianus	Heteromys desmarestianus	S	Museo de Zoologia Alfonso L. Herrera, Facultad de Ciencias, UNAM	D	1989	Santiago Comaltepec	2	MCF
Rodentia	Heteromyidae	Heteromys	desmarestianus	Heteromys desmarestianus	S	Museo de Zoologia Alfonso L. Herrera, Facultad de Ciencias, UNAM	D	1989	Santiago Comaltepec	3	MCF
Rodentia	Heteromyidae	Heteromys	desmarestianus	Heteromys desmarestianus	S	University of Kansas, Museum of Natural History	D	1964	Santiago Comaltepec	2	MCF
Rodentia	Heteromyidae	Heteromys	desmarestianus	Heteromys desmarestianus	S	University of Kansas, Museum of Natural History	D	1964	Santiago Comaltepec	3	MCF
Didelphimorphia	Didelphidae	Marmosa	mexicana	Marmosa mexicana	S	American Museum of Natural History	D	1967	Santiago Comaltepec	3	MCF
Didelphimorphia	Didelphidae	Marmosa	mexicana	Marmosa mexicana	S	American Museum of Natural History	D	1968	Santiago Comaltepec	3	MCF
Didelphimorphia	Didelphidae	Marmosa	mexicana	Marmosa mexicana	S	American Museum of Natural History	D	1969	Santiago Comaltepec	3	MCF
Didelphimorphia	Didelphidae	Marmosa	mexicana	Marmosa mexicana	S	Coleccion Nacional de Mamiferos, Instituto de Biologia, UNAM	D	1989	Santiago Comaltepec	3	MCF
Didelphimorphia	Didelphidae	Marmosa	mexicana	Marmosa mexicana	S	Coleccion Nacional de Mamiferos, Instituto de Biologia, UNAM	D	1990	Santiago Comaltepec	3	MCF
Didelphimorphia	Didelphidae	Marmosa	mexicana	Marmosa mexicana	S	University of Kansas, Museum of Natural History	D	1962	Santiago Comaltepec	3	MCF
Didelphimorphia	Didelphidae	Marmosa	mexicana	Marmosa mexicana	S	University of Kansas, Museum of Natural History	D	1964	Santiago Comaltepec	2	MCF
Didelphimorphia	Didelphidae	Marmosa	mexicana	Marmosa mexicana	S	University of Kansas, Museum of Natural History	D	1964	Santiago Comaltepec	3	MCF
Didelphimorphia	Didelphidae	Marmosa	mexicana	Marmosa mexicana	S	University of Kansas, Museum of Natural History	D	1964	Santiago Comaltepec	3	MCF
Didelphimorphia	Didelphidae	Marmosa	mexicana	Marmosa mexicana	S	University of Kansas, Museum of Natural History	D	1969	Santiago Comaltepec	2	MCF
Didelphimorphia	Didelphidae	Marmosa	mexicana	Marmosa mexicana	S	University of Kansas, Museum of Natural History	D	1970	Santiago Comaltepec	3	MCF
Rodentia	Cricetidae	Megadontomys	cryophilus	Megadontomys cryophilus	S	Coleccion Nacional de Mamiferos, Instituto de Biologia, UNAM	D	1989	Santiago Comaltepec	3	MCF
Rodentia	Cricetidae	Megadontomys	cryophilus	Megadontomys cryophilus	S	Coleccion Nacional de Mamiferos, Instituto de Biologia, UNAM	D	1989	Santiago Comaltepec	3	MCF
Rodentia	Cricetidae	Megadontomys	cryophilus	Megadontomys cryophilus	S	Coleccion Nacional de Mamiferos, Instituto de Biologia, UNAM	D	1989	Santiago Comaltepec	3	MCF
Rodentia	Cricetidae	Megadontomys	cryophilus	Megadontomys cryophilus	S	Coleccion Nacional de Mamiferos, Instituto de Biologia, UNAM	D	1990	Santiago Comaltepec	3	MCF
Rodentia	Cricetidae	Megadontomys	cryophilus	Megadontomys cryophilus	S	Coleccion Nacional de Mamiferos, Instituto de Biologia, UNAM	D	1990	Santiago Comaltepec	3	MCF
Rodentia	Cricetidae	Megadontomys	cryophilus	Megadontomys cryophilus	S	Coleccion Nacional de Mamiferos, Instituto de Biologia, UNAM	D	1991	Santiago Comaltepec	3	MCF
Rodentia	Cricetidae	Megadontomys	cryophilus	Megadontomys cryophilus	S	Museo de Zoologia Alfonso L. Herrera, Facultad de Ciencias, UNAM	D	1987	Santiago Comaltepec	3	MCF
Rodentia	Cricetidae	Megadontomys	cryophilus	Megadontomys cryophilus	S	The Field Museum	D	1990	Santiago Comaltepec	3	MCF
Rodentia	Cricetidae	Megadontomys	cryophilus	Megadontomys cryophilus	S	Registro Bibliografico R Hall	D	1981	Santiago Comaltepec	3	MCF
Rodentia	Cricetidae	Microtus	oaxacensis	Microtus oaxacensis	S	Coleccion Nacional de Mamiferos, Instituto de Biologia, UNAM	D	1989	Santiago Comaltepec	3	MCF
Rodentia	Cricetidae	Microtus	oaxacensis	Microtus oaxacensis	S	Coleccion Nacional de Mamiferos, Instituto de Biologia, UNAM	D	1990	Santiago Comaltepec	3	MCF
Rodentia	Cricetidae	Microtus	oaxacensis	Microtus oaxacensis	S	Coleccion Nacional de Mamiferos, Instituto de Biologia, UNAM	D	1991	Santiago Comaltepec	3	MCF
Rodentia	Cricetidae	Microtus	oaxacensis	Microtus oaxacensis	S	Museo de Zoologia Alfonso L. Herrera, Facultad de Ciencias, UNAM	D	1987	Santiago Comaltepec	3	MCF
Rodentia	Cricetidae	Microtus	oaxacensis	Microtus oaxacensis	S	Museo de Zoologia Alfonso L. Herrera, Facultad de Ciencias, UNAM	D	1987	Santiago Comaltepec	3	MCF
Rodentia	Cricetidae	Microtus	oaxacensis	Microtus oaxacensis	S	The Field Museum	D	1990	Santiago Comaltepec	3	MCF
Rodentia	Cricetidae	Peromyscus	ND	ND	S	Museo de Zoologia Alfonso L. Herrera, Facultad de Ciencias, UNAM	D	1987	San Pedro Yolox	3	MCF
Rodentia	Cricetidae	Peromyscus	ND	ND	S	Museo de Zoologia Alfonso L. Herrera, Facultad de Ciencias, UNAM	D	1988	San Pedro Yolox	3	MCF
Rodentia	Cricetidae	Peromyscus	ND	ND	S	Texas Tech University, Museum of Texas Tech University	D	1974	Santiago Comaltepec	3	MCF
Rodentia	Cricetidae	Nyctomys	sumichrasti	Nyctomys sumichrasti	S	Coleccion Nacional de Mamiferos, Instituto de Biologia, UNAM	D	1989	Santiago Comaltepec	3	MCF
Rodentia	Cricetidae	Nyctomys	sumichrasti	Nyctomys sumichrasti	S	Coleccion Nacional de Mamiferos, Instituto de Biologia, UNAM	D	1990	Santiago Comaltepec	3	MCF
Rodentia	Cricetidae	Nyctomys	sumichrasti	Nyctomys sumichrasti	S	Coleccion Nacional de Mamiferos, Instituto de Biologia, UNAM	D	1991	Santiago Comaltepec	3	MCF
Rodentia	Cricetidae	Oligoryzomys	fulvescens	Oligoryzomys fulvescens	S	Coleccion Nacional de Mamiferos, Instituto de Biologia, UNAM	D	1989	Santiago Comaltepec	3	MCF
Rodentia	Cricetidae	Oligoryzomys	fulvescens	Oligoryzomys fulvescens	S	Coleccion Nacional de Mamiferos, Instituto de Biologia, UNAM	D	1990	Santiago Comaltepec	3	MCF
Rodentia	Cricetidae	Oligoryzomys	fulvescens	Oligoryzomys fulvescens	S	University of Kansas, Museum of Natural History	D	1975	Santiago Comaltepec	2	MCF
Rodentia	Cricetidae	Oryzomys	couesi	Oryzomys couesi	S	Coleccion Nacional de Mamiferos, Instituto de Biologia, UNAM	D	1989	Santiago Comaltepec	2	MCF
Rodentia	Cricetidae	Oryzomys	couesi	Oryzomys couesi	S	Coleccion Nacional de Mamiferos, Instituto de Biologia, UNAM	D	1989	Santiago Comaltepec	3	MCF
Rodentia	Cricetidae	Peromyscus	aztecus	Peromyscus aztecus	S	American Museum of Natural History	D	1959	Santiago Comaltepec	3	MCF
Rodentia	Cricetidae	Peromyscus	aztecus	Peromyscus aztecus	S	Natural History Museum of Los Angeles County	D	1986	Santiago Comaltepec	3	MCF
Rodentia	Cricetidae	Peromyscus	aztecus	Peromyscus aztecus	S	Registro Bibliografico R Hall	D	1981	San Pedro Yolox	3	MCF
Rodentia	Cricetidae	Peromyscus	furvus	Peromyscus furvus	S	Texas Tech University, Museum of Texas Tech University	D	1974	Santiago Comaltepec	3	MCF
Rodentia	Cricetidae	Peromyscus	furvus	Peromyscus furvus	S	Texas Tech University, Museum of Texas Tech University	D	1974	Santiago Comaltepec	3	MCF
Rodentia	Cricetidae	Peromyscus	levipes	Peromyscus levipes	S	Coleccion Nacional de Mamiferos, Instituto de Biologia, UNAM	D	1990	Santiago Comaltepec	3	MCF
Rodentia	Cricetidae	Peromyscus	levipes	Peromyscus levipes	S	Coleccion Nacional de Mamiferos, Instituto de Biologia, UNAM	D	1990	Santiago Comaltepec	3	MCF
Rodentia	Cricetidae	Peromyscus	melanocarpus	Peromyscus melanocarpus	S	American Museum of Natural History	D	1959	Santiago Comaltepec	3	MCF
Rodentia	Cricetidae	Peromyscus	melanocarpus	Peromyscus melanocarpus	S	Coleccion Nacional de Mamiferos, Instituto de Biologia, UNAM	D	1989	Santiago Comaltepec	2	MCF
Rodentia	Cricetidae	Peromyscus	melanocarpus	Peromyscus melanocarpus	S	Coleccion Nacional de Mamiferos, Instituto de Biologia, UNAM	D	1989	Santiago Comaltepec	3	MCF
Rodentia	Cricetidae	Peromyscus	melanocarpus	Peromyscus melanocarpus	S	Coleccion Nacional de Mamiferos, Instituto de Biologia, UNAM	D	1989	Santiago Comaltepec	3	MCF
Rodentia	Cricetidae	Peromyscus	melanocarpus	Peromyscus melanocarpus	S	Coleccion Nacional de Mamiferos, Instituto de Biologia, UNAM	D	1989	Santiago Comaltepec	3	MCF
Rodentia	Cricetidae	Peromyscus	melanocarpus	Peromyscus melanocarpus	S	Coleccion Nacional de Mamiferos, Instituto de Biologia, UNAM	D	1989	Santiago Comaltepec	3	MCF
Rodentia	Cricetidae	Peromyscus	melanocarpus	Peromyscus melanocarpus	S	Coleccion Nacional de Mamiferos, Instituto de Biologia, UNAM	D	1990	Santiago Comaltepec	3	MCF
Rodentia	Cricetidae	Peromyscus	melanocarpus	Peromyscus melanocarpus	S	Coleccion Nacional de Mamiferos, Instituto de Biologia, UNAM	D	1990	Santiago Comaltepec	3	MCF
Rodentia	Cricetidae	Peromyscus	melanocarpus	Peromyscus melanocarpus	S	Coleccion Nacional de Mamiferos, Instituto de Biologia, UNAM	D	1990	Santiago Comaltepec	3	MCF
Rodentia	Cricetidae	Peromyscus	melanocarpus	Peromyscus melanocarpus	S	Coleccion Nacional de Mamiferos, Instituto de Biologia, UNAM	D	1991	Santiago Comaltepec	3	MCF
Rodentia	Cricetidae	Peromyscus	melanocarpus	Peromyscus melanocarpus	S	Museo de Zoologia Alfonso L. Herrera, Facultad de Ciencias, UNAM	D	1987	San Pedro Yolox	3	MCF
Rodentia	Cricetidae	Peromyscus	melanocarpus	Peromyscus melanocarpus	S	Museo de Zoologia Alfonso L. Herrera, Facultad de Ciencias, UNAM	D	1987	San Pedro Yolox	3	MCF
Rodentia	Cricetidae	Peromyscus	melanocarpus	Peromyscus melanocarpus	S	Museo de Zoologia Alfonso L. Herrera, Facultad de Ciencias, UNAM	D	1988	San Pedro Yolox	3	MCF
Rodentia	Cricetidae	Peromyscus	melanocarpus	Peromyscus melanocarpus	S	Museo de Zoologia Alfonso L. Herrera, Facultad de Ciencias, UNAM	D	1987	Santiago Comaltepec	3	MCF
Rodentia	Cricetidae	Peromyscus	melanocarpus	Peromyscus melanocarpus	S	Museo de Zoologia Alfonso L. Herrera, Facultad de Ciencias, UNAM	D	1987	Santiago Comaltepec	3	MCF
Rodentia	Cricetidae	Peromyscus	melanocarpus	Peromyscus melanocarpus	S	Museo de Zoologia Alfonso L. Herrera, Facultad de Ciencias, UNAM	D	1989	Santiago Comaltepec	3	MCF
Rodentia	Cricetidae	Peromyscus	melanocarpus	Peromyscus melanocarpus	S	Texas A & M University, Texas Cooperative Wildlife Collection	D	9999	Santiago Comaltepec	3	MCF
Rodentia	Cricetidae	Peromyscus	melanocarpus	Peromyscus melanocarpus	S	University of Kansas, Museum of Natural History	D	1964	Santiago Comaltepec	3	MCF
Rodentia	Cricetidae	Peromyscus	melanocarpus	Peromyscus melanocarpus	S	University of Kansas, Museum of Natural History	D	1964	Santiago Comaltepec	3	MCF
Rodentia	Cricetidae	Peromyscus	mexicanus	Peromyscus mexicanus	S	Coleccion Nacional de Mamiferos, Instituto de Biologia, UNAM	D	1964	Santiago Comaltepec	3	MCF
Rodentia	Cricetidae	Peromyscus	mexicanus	Peromyscus mexicanus	S	Coleccion Nacional de Mamiferos, Instituto de Biologia, UNAM	D	1989	Santiago Comaltepec	3	MCF
Rodentia	Cricetidae	Peromyscus	mexicanus	Peromyscus mexicanus	S	Coleccion Nacional de Mamiferos, Instituto de Biologia, UNAM	D	1989	Santiago Comaltepec	3	MCF
Rodentia	Cricetidae	Peromyscus	mexicanus	Peromyscus mexicanus	S	Museo de Zoologia Alfonso L. Herrera, Facultad de Ciencias, UNAM	D	1987	San Pedro Yolox	3	MCF
Rodentia	Cricetidae	Peromyscus	mexicanus	Peromyscus mexicanus	S	Museo de Zoologia Alfonso L. Herrera, Facultad de Ciencias, UNAM	D	1987	Santiago Comaltepec	3	MCF
Rodentia	Cricetidae	Peromyscus	mexicanus	Peromyscus mexicanus	S	Museo de Zoologia Alfonso L. Herrera, Facultad de Ciencias, UNAM	D	1987	Santiago Comaltepec	3	MCF
Rodentia	Cricetidae	Peromyscus	mexicanus	Peromyscus mexicanus	S	Museo de Zoologia Alfonso L. Herrera, Facultad de Ciencias, UNAM	D	1987	Santiago Comaltepec	3	MCF
Rodentia	Cricetidae	Peromyscus	mexicanus	Peromyscus mexicanus	S	Museo de Zoologia Alfonso L. Herrera, Facultad de Ciencias, UNAM	D	1988	Santiago Comaltepec	3	MCF
Rodentia	Cricetidae	Peromyscus	mexicanus	Peromyscus mexicanus	S	Museo de Zoologia Alfonso L. Herrera, Facultad de Ciencias, UNAM	D	1989	Santiago Comaltepec	3	MCF
Rodentia	Cricetidae	Peromyscus	mexicanus	Peromyscus mexicanus	S	Texas Tech University, Museum of Texas Tech University	D	1974	Santiago Comaltepec	3	MCF
Rodentia	Cricetidae	Peromyscus	mexicanus	Peromyscus mexicanus	S	University of Kansas, Museum of Natural History	D	1964	Santiago Comaltepec	3	MCF
Rodentia	Cricetidae	Peromyscus	mexicanus	Peromyscus mexicanus	S	University of Kansas, Museum of Natural History	D	1964	Santiago Comaltepec	3	MCF
Rodentia	Cricetidae	Peromyscus	mexicanus	Peromyscus mexicanus	S	University of Kansas, Museum of Natural History	D	1970	Santiago Comaltepec	2	MCF
Rodentia	Cricetidae	Peromyscus	mexicanus	Peromyscus mexicanus	S	University of Kansas, Museum of Natural History	D	1975	Santiago Comaltepec	2	MCF
Rodentia	Cricetidae	Peromyscus	mexicanus	Peromyscus mexicanus	S	Anales del Instituto de Biologia	D	2001	San Juan Bautista Valle Nacional	3	MCF
Rodentia	Cricetidae	Reithrodontomys	mexicanus	Reithrodontomys mexicanus	S	Coleccion Nacional de Mamiferos, Instituto de Biologia, UNAM	D	1989	Santiago Comaltepec	2	MCF
Rodentia	Cricetidae	Reithrodontomys	mexicanus	Reithrodontomys mexicanus	S	Coleccion Nacional de Mamiferos, Instituto de Biologia, UNAM	D	1989	Santiago Comaltepec	3	MCF
Rodentia	Cricetidae	Reithrodontomys	mexicanus	Reithrodontomys mexicanus	S	Coleccion Nacional de Mamiferos, Instituto de Biologia, UNAM	D	1989	Santiago Comaltepec	3	MCF
Rodentia	Cricetidae	Reithrodontomys	mexicanus	Reithrodontomys mexicanus	S	Coleccion Nacional de Mamiferos, Instituto de Biologia, UNAM	D	1989	Santiago Comaltepec	3	MCF
Rodentia	Cricetidae	Reithrodontomys	mexicanus	Reithrodontomys mexicanus	S	Coleccion Nacional de Mamiferos, Instituto de Biologia, UNAM	D	1990	Santiago Comaltepec	3	MCF
Rodentia	Cricetidae	Reithrodontomys	mexicanus	Reithrodontomys mexicanus	S	Coleccion Nacional de Mamiferos, Instituto de Biologia, UNAM	D	1991	Santiago Comaltepec	3	MCF
Rodentia	Cricetidae	Reithrodontomys	mexicanus	Reithrodontomys mexicanus	S	Museo de Zoologia Alfonso L. Herrera, Facultad de Ciencias, UNAM	D	1987	Santiago Comaltepec	3	MCF
Rodentia	Cricetidae	Reithrodontomys	mexicanus	Reithrodontomys mexicanus	S	University of Kansas, Museum of Natural History	D	1964	Santiago Comaltepec	3	MCF
Rodentia	Cricetidae	Reithrodontomys	microdon	Reithrodontomys microdon	S	Museo de Zoologia Alfonso L. Herrera, Facultad de Ciencias, UNAM	D	1987	Santiago Comaltepec	3	MCF
Rodentia	Cricetidae	Reithrodontomys	microdon	Reithrodontomys microdon	S	Natural History Museum of Los Angeles County	D	1986	Santiago Comaltepec	3	MCF
Rodentia	Cricetidae	Reithrodontomys	sumichrasti	Reithrodontomys sumichrasti	S	Coleccion Nacional de Mamiferos, Instituto de Biologia, UNAM	D	1990	Santiago Comaltepec	3	MCF
Rodentia	Cricetidae	Sigmodon	hispidus	Sigmodon hispidus	S	Coleccion Nacional de Mamiferos, Instituto de Biologia, UNAM	D	1989	Santiago Comaltepec	2	MCF
Rodentia	Cricetidae	Sigmodon	hispidus	Sigmodon hispidus	S	Museo de Zoologia Alfonso L. Herrera, Facultad de Ciencias, UNAM	D	1987	Santiago Comaltepec	3	MCF
Soricomorpha	Soricidae	Sorex	macrodon	Sorex macrodon	S	University of Kansas Biodiversity Institute Mammalogy Collection	D	1969	Santiago Comaltepec	3	MCF
Soricomorpha	Soricidae	Sorex	macrodon	Sorex macrodon	S	University of Kansas Biodiversity Institute Mammalogy Collection	D	1975	Santiago Comaltepec	3	MCF
Soricomorpha	Soricidae	Sorex	macrodon	Sorex macrodon	S	University of Kansas Biodiversity Institute Mammalogy Collection	D	1975	Santiago Comaltepec	3	MCF
Soricomorpha	Soricidae	Sorex	macrodon	Sorex macrodon	S	University of Kansas Biodiversity Institute Mammalogy Collection	D	1975	Santiago Comaltepec	3	MCF
Soricomorpha	Soricidae	Sorex	saussurei	Sorex saussurei	S	Incorporación de nuevos registros de mamíferos de la región Sierra Norte de Oaxaca	D	1964		3	MCF
Soricomorpha	Soricidae	Sorex	saussurei	Sorex saussurei	S	Incorporación de nuevos registros de mamíferos de la región Sierra Norte de Oaxaca	D	1969		3	MCF
Soricomorpha	Soricidae	Sorex	saussurei	Sorex saussurei	S	Incorporación de nuevos registros de mamíferos de la región Sierra Norte de Oaxaca	D	1970		3	MCF
Soricomorpha	Soricidae	Sorex	saussurei	Sorex saussurei	S	Incorporación de nuevos registros de mamíferos de la región Sierra Norte de Oaxaca	D	1970		3	MCF
Soricomorpha	Soricidae	Sorex	saussurei	Sorex saussurei	S	Incorporación de nuevos registros de mamíferos de la región Sierra Norte de Oaxaca	D	1970		3	MCF
Soricomorpha	Soricidae	Sorex	saussurei	Sorex saussurei	S	Incorporación de nuevos registros de mamíferos de la región Sierra Norte de Oaxaca	D	1970		3	MCF
Soricomorpha	Soricidae	Sorex	saussurei	Sorex saussurei	S	LACM Vertebrates	D	1986	Santiago Comaltepec	4	MCF
Soricomorpha	Soricidae	Sorex	saussurei	Sorex saussurei	S	LACM Vertebrates	D	1986	Santiago Comaltepec	4	MCF
Soricomorpha	Soricidae	Sorex	saussurei	Sorex saussurei	S	LACM Vertebrates	D	1986	Santiago Comaltepec	4	MCF
Soricomorpha	Soricidae	Sorex	saussurei	Sorex saussurei	S	LACM Vertebrates	D	1986	Santiago Comaltepec	4	MCF
Soricomorpha	Soricidae	Sorex	saussurei	Sorex saussurei	S	LACM Vertebrates	D	1986	Santiago Comaltepec	4	MCF
Soricomorpha	Soricidae	Sorex	saussurei	Sorex saussurei	S	LACM Vertebrates	D	1986	Santiago Comaltepec	4	MCF
Soricomorpha	Soricidae	Sorex	saussurei	Sorex saussurei	S	LACM Vertebrates	D	1986	Santiago Comaltepec	4	MCF
Soricomorpha	Soricidae	Sorex	saussurei	Sorex saussurei	S	LACM Vertebrates	D	1986	Santiago Comaltepec	4	MCF
Soricomorpha	Soricidae	Sorex	saussurei	Sorex saussurei	S	LACM Vertebrates	D	1986	Santiago Comaltepec	4	MCF
Soricomorpha	Soricidae	Sorex	saussurei	Sorex saussurei	S	LACM Vertebrates	D	1986	Santiago Comaltepec	4	MCF
Soricomorpha	Soricidae	Sorex	saussurei	Sorex saussurei	S	LACM Vertebrates	D	1986	Santiago Comaltepec	4	MCF
Soricomorpha	Soricidae	Sorex	saussurei	Sorex saussurei	S	LACM Vertebrates	D	1986	Santiago Comaltepec	4	MCF
Soricomorpha	Soricidae	Sorex	saussurei	Sorex saussurei	S	LACM Vertebrates	D	1986	Santiago Comaltepec	4	MCF
Soricomorpha	Soricidae	Sorex	saussurei	Sorex saussurei	S	LACM Vertebrates	D	1986	Santiago Comaltepec	4	MCF
Soricomorpha	Soricidae	Sorex	saussurei	Sorex saussurei	S	University of Kansas Biodiversity Institute Mammalogy Collection	D	1969		3	MCF
Soricomorpha	Soricidae	Sorex	saussurei	Sorex saussurei	S	University of Kansas Biodiversity Institute Mammalogy Collection	D	1970		3	MCF
Soricomorpha	Soricidae	Sorex	ventralis	Sorex ventralis	S	UAMI_Análisis morfofenético de las poblaciones alopátricas de Thomomys umbrinus (Rodentia: Geomyidae) en la provincia volcánico-transversa	D	1995	SANTIAGO CAMOTLAN	3	MCF
Soricomorpha	Soricidae	Sorex	ventralis	Sorex ventralis	S	UAMI_Análisis morfofenético de las poblaciones alopátricas de Thomomys umbrinus (Rodentia: Geomyidae) en la provincia volcánico-transversa	D	1995	SANTIAGO CAMOTLAN	3	MCF
Soricomorpha	Soricidae	Sorex	veraecrucis	Sorex veraecrucis	S	Coleccion Nacional de Mamiferos, Instituto de Biologia, UNAM	D	1986	Santiago Comaltepec	3	MCF
Soricomorpha	Soricidae	Sorex	veraecrucis	Sorex veraecrucis	S	Coleccion Nacional de Mamiferos, Instituto de Biologia, UNAM	D	1989	Santiago Comaltepec	3	MCF
Soricomorpha	Soricidae	Sorex	veraecrucis	Sorex veraecrucis	S	Coleccion Nacional de Mamiferos, Instituto de Biologia, UNAM	D	1990	Santiago Comaltepec	3	MCF
Soricomorpha	Soricidae	Sorex	veraecrucis	Sorex veraecrucis	S	Coleccion Nacional de Mamiferos, Instituto de Biologia, UNAM	D	1991	Santiago Comaltepec	3	MCF
Rodentia	Cricetidae	Tylomys	nudicaudus	Tylomys nudicaudus	S	Coleccion Nacional de Mamiferos, Instituto de Biologia, UNAM	D	1964	Santiago Comaltepec	3	MCF
Soricomorpha	Soricidae	Cryptotis	goldmani	Cryptotis goldmani	S	University of Kansas Biodiversity Institute Mammalogy Collection	D	1972	Ixtlan	4	P-OF
Soricomorpha	Soricidae	Cryptotis	magna	Cryptotis magna	S	University of Kansas, Museum of Natural History	D	1964	Santiago Comaltepec	3	P-OF
Soricomorpha	Soricidae	Cryptotis	magna	Cryptotis magna	S	University of Kansas, Museum of Natural History	D	1964	Santiago Comaltepec	3	P-OF
Soricomorpha	Soricidae	Cryptotis	magna	Cryptotis magna	S	University of Kansas, Museum of Natural History	D	1964	Santiago Comaltepec	3	P-OF
Soricomorpha	Soricidae	Cryptotis	magna	Cryptotis magna	S	University of Kansas, Museum of Natural History	D	1964	Santiago Comaltepec	4	P-OF
Soricomorpha	Soricidae	Cryptotis	magna	Cryptotis magna	S	University of Kansas, Museum of Natural History	D	1970	Santiago Comaltepec	3	P-OF
Soricomorpha	Soricidae	Cryptotis	magna	Cryptotis magna	S	University of Kansas, Museum of Natural History	D	1970	Santiago Comaltepec	3	P-OF
Soricomorpha	Soricidae	Cryptotis	magna	Cryptotis magna	S	University of Kansas, Museum of Natural History	D	1970	Santiago Comaltepec	3	P-OF
Soricomorpha	Soricidae	Cryptotis	magna	Cryptotis magna	S	University of Kansas, Museum of Natural History	D	1970	Santiago Comaltepec	3	P-OF
Soricomorpha	Soricidae	Cryptotis	magna	Cryptotis magna	S	University of Kansas, Museum of Natural History	D	1975	Santiago Comaltepec	3	P-OF
Soricomorpha	Soricidae	Cryptotis	magna	Cryptotis magna	S	University of Kansas, Museum of Natural History	D	1975	Santiago Comaltepec	4	P-OF
Soricomorpha	Soricidae	Cryptotis	magna	Cryptotis magna	S	Bulletin of The American Museum of Natural History	D	1969	Santiago Comaltepec	4	P-OF
Soricomorpha	Soricidae	Cryptotis	magna	Cryptotis magna	S	Registro Bibliografico R Hall	D	1981	Santiago Comaltepec	4	P-OF
Soricomorpha	Soricidae	Cryptotis	mexicana	Cryptotis mexicana	S	University of Kansas, Museum of Natural History	D	1962	Santiago Comaltepec	3	P-OF
Soricomorpha	Soricidae	Cryptotis	mexicana	Cryptotis mexicana	S	University of Kansas, Museum of Natural History	D	1964	Santiago Comaltepec	3	P-OF
Soricomorpha	Soricidae	Cryptotis	mexicana	Cryptotis mexicana	S	University of Kansas, Museum of Natural History	D	1969	Santiago Comaltepec	4	P-OF
Soricomorpha	Soricidae	Cryptotis	mexicana	Cryptotis mexicana	S	University of Kansas, Museum of Natural History	D	1970	Santiago Comaltepec	3	P-OF
Soricomorpha	Soricidae	Cryptotis	mexicana	Cryptotis mexicana	S	University of Kansas, Museum of Natural History	D	1970	Santiago Comaltepec	4	P-OF
Rodentia	Cricetidae	Habromys	chinanteco	Habromys chinanteco	S	American Museum of Natural History	D	1979	Santiago Comaltepec	4	P-OF
Rodentia	Cricetidae	Habromys	chinanteco	Habromys chinanteco	S	University of Kansas, Museum of Natural History	D	1970	Santiago Comaltepec	4	P-OF
Rodentia	Cricetidae	Habromys	chinanteco	Habromys chinanteco	S	University of Kansas, Museum of Natural History	D	1975	Santiago Comaltepec	4	P-OF
Rodentia	Cricetidae	Habromys	chinanteco	Habromys chinanteco	S	University of Kansas, Museum of Natural History	D		Santiago Comaltepec	4	P-OF
Rodentia	Cricetidae	Habromys	chinanteco	Habromys chinanteco	S	Registro Bibliografico R Hall	D	1981	Santiago Comaltepec	4	P-OF
Rodentia	Cricetidae	Habromys	ixtlani	Habromys ixtlani	S	Texas A & M University, Texas Cooperative Wildlife Collection	D	1983	Santiago Comaltepec	4	P-OF
Rodentia	Cricetidae	Habromys	ixtlani	Habromys ixtlani	S	University of California, Berkeley, Museum of Vertebrate Zoology	D	1981	Santiago Comaltepec	4	P-OF
Rodentia	Cricetidae	Habromys	ixtlani	Habromys ixtlani	S	University of Kansas, Museum of Natural History	D	1964	Santiago Comaltepec	4	P-OF
Rodentia	Cricetidae	Habromys	ixtlani	Habromys ixtlani	S	University of Kansas, Museum of Natural History	D	1969	Santiago Comaltepec	4	P-OF
Rodentia	Cricetidae	Habromys	ixtlani	Habromys ixtlani	S	University of Kansas, Museum of Natural History	D	1970	Santiago Comaltepec	3	P-OF
Rodentia	Cricetidae	Habromys	ixtlani	Habromys ixtlani	S	University of Kansas, Museum of Natural History	D	1970	Santiago Comaltepec	4	P-OF
Rodentia	Cricetidae	Habromys	ixtlani	Habromys ixtlani	S	University of Kansas, Museum of Natural History	D	1970	Santiago Comaltepec	4	P-OF
Rodentia	Cricetidae	Habromys	ixtlani	Habromys ixtlani	S	University of Kansas, Museum of Natural History	D	1975	Santiago Comaltepec	3	P-OF
Rodentia	Cricetidae	Habromys	ixtlani	Habromys ixtlani	S	Bulletin of The American Museum of Natural History	D	1969	Santiago Comaltepec	4	P-OF
Rodentia	Cricetidae	Habromys	ixtlani	Habromys ixtlani	S	Registro Bibliografico R Hall	D	1981	Santiago Comaltepec	4	P-OF
Rodentia	Cricetidae	Habromys	ixtlani	Habromys ixtlani	S	Registro Bibliografico R Hall	D	1981	Santiago Comaltepec	4	P-OF
Rodentia	Cricetidae	Habromys	lepturus	Habromys lepturus	S	American Museum of Natural History	D	1964	Santiago Comaltepec	4	P-OF
Rodentia	Cricetidae	Handleyomys	alfaroi	Handleyomys alfaroi	S	Coleccion Nacional de Mamiferos, Instituto de Biologia, UNAM	D	1962	Santiago Comaltepec	3	P-OF
Rodentia	Cricetidae	Handleyomys	alfaroi	Handleyomys alfaroi	S	Museo de Zoologia Alfonso L. Herrera, Facultad de Ciencias, UNAM	D	1987	Santiago Comaltepec	4	P-OF
Rodentia	Cricetidae	Handleyomys	alfaroi	Handleyomys alfaroi	S	Museo de Zoologia Alfonso L. Herrera, Facultad de Ciencias, UNAM	D	1987	Santiago Comaltepec	4	P-OF
Rodentia	Cricetidae	Handleyomys	alfaroi	Handleyomys alfaroi	S	Museo de Zoologia Alfonso L. Herrera, Facultad de Ciencias, UNAM	D	1987	Santiago Comaltepec	4	P-OF
Rodentia	Cricetidae	Handleyomys	alfaroi	Handleyomys alfaroi	S	Museo de Zoologia Alfonso L. Herrera, Facultad de Ciencias, UNAM	D	1987	Santiago Comaltepec	4	P-OF
Rodentia	Cricetidae	Handleyomys	alfaroi	Handleyomys alfaroi	S	Museo de Zoologia Alfonso L. Herrera, Facultad de Ciencias, UNAM	D	1987	Santiago Comaltepec	4	P-OF
Rodentia	Cricetidae	Handleyomys	alfaroi	Handleyomys alfaroi	S	Museo de Zoologia Alfonso L. Herrera, Facultad de Ciencias, UNAM	D	1987	Santiago Comaltepec	4	P-OF
Rodentia	Cricetidae	Handleyomys	alfaroi	Handleyomys alfaroi	S	Museo de Zoologia Alfonso L. Herrera, Facultad de Ciencias, UNAM	D	1987	Santiago Comaltepec	4	P-OF
Rodentia	Cricetidae	Handleyomys	alfaroi	Handleyomys alfaroi	S	Museo de Zoologia Alfonso L. Herrera, Facultad de Ciencias, UNAM	D	1988	Santiago Comaltepec	4	P-OF
Rodentia	Cricetidae	Handleyomys	alfaroi	Handleyomys alfaroi	S	Museo de Zoologia Alfonso L. Herrera, Facultad de Ciencias, UNAM	D	1988	Santiago Comaltepec	4	P-OF
Rodentia	Cricetidae	Handleyomys	alfaroi	Handleyomys alfaroi	S	Museo de Zoologia Alfonso L. Herrera, Facultad de Ciencias, UNAM	D	1988	Santiago Comaltepec	4	P-OF
Rodentia	Cricetidae	Handleyomys	alfaroi	Handleyomys alfaroi	S	Museo de Zoologia Alfonso L. Herrera, Facultad de Ciencias, UNAM	D	9999	Santiago Comaltepec	4	P-OF
Rodentia	Cricetidae	Handleyomys	alfaroi	Handleyomys alfaroi	S	University of Kansas, Museum of Natural History	D	1962	Santiago Comaltepec	3	P-OF
Rodentia	Cricetidae	Handleyomys	alfaroi	Handleyomys alfaroi	S	University of Kansas, Museum of Natural History	D	1964	Santiago Comaltepec	2	P-OF
Rodentia	Cricetidae	Handleyomys	alfaroi	Handleyomys alfaroi	S	University of Kansas, Museum of Natural History	D	1964	Santiago Comaltepec	3	P-OF
Rodentia	Cricetidae	Handleyomys	alfaroi	Handleyomys alfaroi	S	University of Kansas, Museum of Natural History	D	1964	Santiago Comaltepec	3	P-OF
Rodentia	Cricetidae	Handleyomys	alfaroi	Handleyomys alfaroi	S	University of Kansas, Museum of Natural History	D	1964	Santiago Comaltepec	3	P-OF
Rodentia	Cricetidae	Handleyomys	alfaroi	Handleyomys alfaroi	S	University of Kansas, Museum of Natural History	D	1964	Santiago Comaltepec	4	P-OF
Rodentia	Cricetidae	Handleyomys	alfaroi	Handleyomys alfaroi	S	University of Kansas, Museum of Natural History	D	1969	Santiago Comaltepec	3	P-OF
Rodentia	Cricetidae	Handleyomys	alfaroi	Handleyomys alfaroi	S	University of Kansas, Museum of Natural History	D	1969	Santiago Comaltepec	3	P-OF
Rodentia	Cricetidae	Handleyomys	alfaroi	Handleyomys alfaroi	S	University of Kansas, Museum of Natural History	D	1969	Santiago Comaltepec	3	P-OF
Rodentia	Cricetidae	Handleyomys	alfaroi	Handleyomys alfaroi	S	University of Kansas, Museum of Natural History	D	1969	Santiago Comaltepec	4	P-OF
Rodentia	Cricetidae	Handleyomys	alfaroi	Handleyomys alfaroi	S	University of Kansas, Museum of Natural History	D	1970	Santiago Comaltepec	3	P-OF
Rodentia	Cricetidae	Handleyomys	alfaroi	Handleyomys alfaroi	S	University of Kansas, Museum of Natural History	D	1970	Santiago Comaltepec	3	P-OF
Rodentia	Cricetidae	Handleyomys	alfaroi	Handleyomys alfaroi	S	University of Kansas, Museum of Natural History	D	1970	Santiago Comaltepec	3	P-OF
Rodentia	Cricetidae	Handleyomys	alfaroi	Handleyomys alfaroi	S	University of Kansas, Museum of Natural History	D	1970	Santiago Comaltepec	4	P-OF
Rodentia	Cricetidae	Handleyomys	alfaroi	Handleyomys alfaroi	S	University of Kansas, Museum of Natural History	D	1970	Santiago Comaltepec	4	P-OF
Rodentia	Cricetidae	Handleyomys	alfaroi	Handleyomys alfaroi	S	University of Kansas, Museum of Natural History	D	1975	Santiago Comaltepec	3	P-OF
Rodentia	Cricetidae	Handleyomys	chapmani	Handleyomys chapmani	S	American Museum of Natural History	D	1966	Santiago Comaltepec	3	P-OF
Rodentia	Cricetidae	Handleyomys	chapmani	Handleyomys chapmani	S	American Museum of Natural History	D	1968	Santiago Comaltepec	3	P-OF
Rodentia	Cricetidae	Handleyomys	chapmani	Handleyomys chapmani	S	American Museum of Natural History	D	1972	Santiago Comaltepec	3	P-OF
Rodentia	Cricetidae	Handleyomys	chapmani	Handleyomys chapmani	S	American Museum of Natural History	D	1979	Santiago Comaltepec	4	P-OF
Rodentia	Cricetidae	Handleyomys	chapmani	Handleyomys chapmani	S	Carnegie Museum of Natural History	D	1979	Santiago Comaltepec	3	P-OF
Rodentia	Cricetidae	Handleyomys	chapmani	Handleyomys chapmani	S	Coleccion Nacional de Mamiferos, Instituto de Biologia, UNAM	D	1964	Santiago Comaltepec	3	P-OF
Rodentia	Cricetidae	Handleyomys	chapmani	Handleyomys chapmani	S	Coleccion Nacional de Mamiferos, Instituto de Biologia, UNAM	D	1964	Santiago Comaltepec	4	P-OF
Rodentia	Cricetidae	Handleyomys	chapmani	Handleyomys chapmani	S	Coleccion Nacional de Mamiferos, Instituto de Biologia, UNAM	D	1990	Santiago Comaltepec	4	P-OF
Rodentia	Cricetidae	Handleyomys	chapmani	Handleyomys chapmani	S	Museo de Zoologia Alfonso L. Herrera, Facultad de Ciencias, UNAM	D	1987	Santiago Comaltepec	4	P-OF
Rodentia	Cricetidae	Handleyomys	chapmani	Handleyomys chapmani	S	Museo de Zoologia Alfonso L. Herrera, Facultad de Ciencias, UNAM	D	1987	Santiago Comaltepec	4	P-OF
Rodentia	Cricetidae	Handleyomys	chapmani	Handleyomys chapmani	S	Texas A & M University, Texas Cooperative Wildlife Collection	D	9999	Santiago Comaltepec	3	P-OF
Rodentia	Cricetidae	Handleyomys	chapmani	Handleyomys chapmani	S	University of California, Berkeley, Museum of Vertebrate Zoology	D	1981	Santiago Comaltepec	3	P-OF
Rodentia	Cricetidae	Handleyomys	chapmani	Handleyomys chapmani	S	University of Kansas, Museum of Natural History	D	1962	Santiago Comaltepec	3	P-OF
Rodentia	Cricetidae	Handleyomys	chapmani	Handleyomys chapmani	S	University of Kansas, Museum of Natural History	D	1964	Santiago Comaltepec	3	P-OF
Rodentia	Cricetidae	Handleyomys	chapmani	Handleyomys chapmani	S	Registro Bibliografico R Hall	D	1981	Santiago Comaltepec	4	P-OF
Rodentia	Cricetidae	Handleyomys	chapmani	Handleyomys chapmani	S	Registro Bibliografico R Hall	D	1981	Santiago Comaltepec	4	P-OF
Rodentia	Cricetidae	Handleyomys	rostratus	Handleyomys rostratus	S	Coleccion Nacional de Mamiferos, Instituto de Biologia, UNAM	D	1962	Santiago Comaltepec	3	P-OF
Rodentia	Heteromyidae	Heteromys	desmarestianus	Heteromys desmarestianus	S	Carnegie Museum of Natural History	D	1979	Santiago Comaltepec	3	P-OF
Rodentia	Heteromyidae	Heteromys	desmarestianus	Heteromys desmarestianus	S	Museo de Zoologia Alfonso L. Herrera, Facultad de Ciencias, UNAM	D	1987	Santiago Comaltepec	4	P-OF
Rodentia	Heteromyidae	Heteromys	desmarestianus	Heteromys desmarestianus	S	Museo de Zoologia Alfonso L. Herrera, Facultad de Ciencias, UNAM	D	1987	Santiago Comaltepec	4	P-OF
Rodentia	Heteromyidae	Heteromys	desmarestianus	Heteromys desmarestianus	S	Museo de Zoologia Alfonso L. Herrera, Facultad de Ciencias, UNAM	D	1987	Santiago Comaltepec	4	P-OF
Rodentia	Heteromyidae	Heteromys	desmarestianus	Heteromys desmarestianus	S	Museo de Zoologia Alfonso L. Herrera, Facultad de Ciencias, UNAM	D	1988	Santiago Comaltepec	3	P-OF
Rodentia	Heteromyidae	Heteromys	desmarestianus	Heteromys desmarestianus	S	Museo de Zoologia Alfonso L. Herrera, Facultad de Ciencias, UNAM	D	1988	Santiago Comaltepec	4	P-OF
Rodentia	Heteromyidae	Heteromys	desmarestianus	Heteromys desmarestianus	S	Museo de Zoologia Alfonso L. Herrera, Facultad de Ciencias, UNAM	D	1988	Santiago Comaltepec	4	P-OF
Rodentia	Heteromyidae	Heteromys	desmarestianus	Heteromys desmarestianus	S	Museo de Zoologia Alfonso L. Herrera, Facultad de Ciencias, UNAM	D	1988	Santiago Comaltepec	4	P-OF
Rodentia	Heteromyidae	Heteromys	desmarestianus	Heteromys desmarestianus	S	Texas A & M University, Texas Cooperative Wildlife Collection	D	9999	Santiago Comaltepec	3	P-OF
Rodentia	Heteromyidae	Heteromys	desmarestianus	Heteromys desmarestianus	S	University of California, Berkeley, Museum of Vertebrate Zoology	D	1981	Santiago Comaltepec	3	P-OF
Rodentia	Heteromyidae	Heteromys	desmarestianus	Heteromys desmarestianus	S	University of Kansas, Museum of Natural History	D	1962	Santiago Comaltepec	3	P-OF
Rodentia	Heteromyidae	Heteromys	desmarestianus	Heteromys desmarestianus	S	University of Kansas, Museum of Natural History	D	1964	Santiago Comaltepec	3	P-OF
Rodentia	Heteromyidae	Heteromys	desmarestianus	Heteromys desmarestianus	S	University of Kansas, Museum of Natural History	D	1964	Santiago Comaltepec	3	P-OF
Rodentia	Heteromyidae	Heteromys	desmarestianus	Heteromys desmarestianus	S	University of Kansas, Museum of Natural History	D	1969	Santiago Comaltepec	3	P-OF
Rodentia	Heteromyidae	Heteromys	desmarestianus	Heteromys desmarestianus	S	University of Kansas, Museum of Natural History	D	1969	Santiago Comaltepec	3	P-OF
Rodentia	Heteromyidae	Heteromys	desmarestianus	Heteromys desmarestianus	S	University of Kansas, Museum of Natural History	D	1969	Santiago Comaltepec	3	P-OF
Rodentia	Heteromyidae	Heteromys	desmarestianus	Heteromys desmarestianus	S	University of Kansas, Museum of Natural History	D	1970	Santiago Comaltepec	3	P-OF
Rodentia	Heteromyidae	Heteromys	desmarestianus	Heteromys desmarestianus	S	University of Kansas, Museum of Natural History	D	1970	Santiago Comaltepec	3	P-OF
Rodentia	Heteromyidae	Heteromys	desmarestianus	Heteromys desmarestianus	S	University of Kansas, Museum of Natural History	D	1975	Santiago Comaltepec	3	P-OF
Rodentia	Cricetidae	Megadontomys	cryophilus	Megadontomys cryophilus	S	American Museum of Natural History	D	1979	Santiago Comaltepec	4	P-OF
Rodentia	Cricetidae	Megadontomys	cryophilus	Megadontomys cryophilus	S	Carnegie Museum of Natural History	D	1979	Santiago Comaltepec	2	P-OF
Rodentia	Cricetidae	Megadontomys	cryophilus	Megadontomys cryophilus	S	Museo de Zoologia Alfonso L. Herrera, Facultad de Ciencias, UNAM	D	1987	Santiago Comaltepec	4	P-OF
Rodentia	Cricetidae	Megadontomys	cryophilus	Megadontomys cryophilus	S	Universidad de Michigan, Museo de Zoologia, Ann Arbor	D	9999	Santiago Comaltepec	4	P-OF
Rodentia	Cricetidae	Megadontomys	cryophilus	Megadontomys cryophilus	S	University of California, Berkeley, Museum of Vertebrate Zoology	D	1981	Santiago Comaltepec	4	P-OF
Rodentia	Cricetidae	Megadontomys	cryophilus	Megadontomys cryophilus	S	University of Kansas, Museum of Natural History	D	1964	Santiago Comaltepec	3	P-OF
Rodentia	Cricetidae	Megadontomys	cryophilus	Megadontomys cryophilus	S	University of Kansas, Museum of Natural History	D	1969	Santiago Comaltepec	3	P-OF
Rodentia	Cricetidae	Megadontomys	cryophilus	Megadontomys cryophilus	S	University of Kansas, Museum of Natural History	D	1969	Santiago Comaltepec	4	P-OF
Rodentia	Cricetidae	Megadontomys	cryophilus	Megadontomys cryophilus	S	University of Kansas, Museum of Natural History	D	1970	Santiago Comaltepec	3	P-OF
Rodentia	Cricetidae	Megadontomys	cryophilus	Megadontomys cryophilus	S	University of Kansas, Museum of Natural History	D	1970	Santiago Comaltepec	3	P-OF
Rodentia	Cricetidae	Megadontomys	cryophilus	Megadontomys cryophilus	S	University of Kansas, Museum of Natural History	D	1970	Santiago Comaltepec	3	P-OF
Rodentia	Cricetidae	Megadontomys	cryophilus	Megadontomys cryophilus	S	University of Kansas, Museum of Natural History	D	1970	Santiago Comaltepec	3	P-OF
Rodentia	Cricetidae	Megadontomys	cryophilus	Megadontomys cryophilus	S	University of Kansas, Museum of Natural History	D	1970	Santiago Comaltepec	4	P-OF
Rodentia	Cricetidae	Megadontomys	cryophilus	Megadontomys cryophilus	S	University of Kansas, Museum of Natural History	D	1970	Santiago Comaltepec	4	P-OF
Rodentia	Cricetidae	Megadontomys	cryophilus	Megadontomys cryophilus	S	University of Kansas, Museum of Natural History	D	1975	Santiago Comaltepec	3	P-OF
Rodentia	Cricetidae	Megadontomys	cryophilus	Megadontomys cryophilus	S	University of Kansas, Museum of Natural History	D	1975	Santiago Comaltepec	3	P-OF
Rodentia	Cricetidae	Megadontomys	cryophilus	Megadontomys cryophilus	S	University of Kansas, Museum of Natural History	D	1975	Santiago Comaltepec	4	P-OF
Rodentia	Cricetidae	Megadontomys	cryophilus	Megadontomys cryophilus	S	Bulletin of The American Museum of Natural History	D	1969	Santiago Comaltepec	4	P-OF
Rodentia	Cricetidae	Megadontomys	cryophilus	Megadontomys cryophilus	S	Registro Bibliografico R Hall	D	1981	Santiago Comaltepec	3	P-OF
Rodentia	Cricetidae	Microtus	mexicanus	Microtus mexicanus	S	American Museum of Natural History	D	1968	Santiago Comaltepec	4	P-OF
Rodentia	Cricetidae	Microtus	mexicanus	Microtus mexicanus	S	American Museum of Natural History	D	1969	Santiago Comaltepec	4	P-OF
Rodentia	Cricetidae	Microtus	mexicanus	Microtus mexicanus	S	University of Kansas, Museum of Natural History	D	1962	Santiago Comaltepec	3	P-OF
Rodentia	Cricetidae	Microtus	mexicanus	Microtus mexicanus	S	University of Kansas, Museum of Natural History	D	1969	Santiago Comaltepec	4	P-OF
Rodentia	Cricetidae	Microtus	mexicanus	Microtus mexicanus	S	University of Kansas, Museum of Natural History	D	1970	Santiago Comaltepec	3	P-OF
Rodentia	Cricetidae	Microtus	mexicanus	Microtus mexicanus	S	University of Kansas, Museum of Natural History	D	1970	Santiago Comaltepec	4	P-OF
Rodentia	Cricetidae	Microtus	mexicanus	Microtus mexicanus	S	Bulletin of The American Museum of Natural History	D	1969	Santiago Comaltepec	4	P-OF
Rodentia	Cricetidae	Microtus	mexicanus	Microtus mexicanus	S	Registro Bibliografico R Hall	D	1981	Santiago Comaltepec	4	P-OF
Rodentia	Cricetidae	Microtus	oaxacensis	Microtus oaxacensis	S	Museo de Zoologia Alfonso L. Herrera, Facultad de Ciencias, UNAM	D	1987	Santiago Comaltepec	4	P-OF
Rodentia	Cricetidae	Microtus	oaxacensis	Microtus oaxacensis	S	University of Kansas, Museum of Natural History	D	1964	Santiago Comaltepec	3	P-OF
Rodentia	Cricetidae	Microtus	oaxacensis	Microtus oaxacensis	S	University of Kansas, Museum of Natural History	D	1969	Santiago Comaltepec	3	P-OF
Rodentia	Cricetidae	Microtus	oaxacensis	Microtus oaxacensis	S	University of Kansas, Museum of Natural History	D	1969	Santiago Comaltepec	3	P-OF
Rodentia	Cricetidae	Microtus	oaxacensis	Microtus oaxacensis	S	University of Kansas, Museum of Natural History	D	1969	Santiago Comaltepec	3	P-OF
Rodentia	Cricetidae	Microtus	oaxacensis	Microtus oaxacensis	S	University of Kansas, Museum of Natural History	D	1969	Santiago Comaltepec	3	P-OF
Rodentia	Cricetidae	Microtus	oaxacensis	Microtus oaxacensis	S	University of Kansas, Museum of Natural History	D	1970	Santiago Comaltepec	3	P-OF
Rodentia	Cricetidae	Microtus	oaxacensis	Microtus oaxacensis	S	University of Kansas, Museum of Natural History	D	1970	Santiago Comaltepec	3	P-OF
Rodentia	Cricetidae	Microtus	oaxacensis	Microtus oaxacensis	S	University of Kansas, Museum of Natural History	D	1970	Santiago Comaltepec	3	P-OF
Rodentia	Cricetidae	Microtus	oaxacensis	Microtus oaxacensis	S	University of Kansas, Museum of Natural History	D	1970	Santiago Comaltepec	4	P-OF
Rodentia	Cricetidae	Microtus	oaxacensis	Microtus oaxacensis	S	University of Kansas, Museum of Natural History	D	1975	Santiago Comaltepec	3	P-OF
Rodentia	Cricetidae	Sigmodon	ND	ND	S	American Museum of Natural History	D	1968	Santiago Comaltepec	3	P-OF
Rodentia	Cricetidae	Reithrodontomys	ND	ND	S	American Museum of Natural History	D	1969	Santiago Comaltepec	3	P-OF
Rodentia	Cricetidae	Microtus	ND	ND	S	Museo de Zoologia Alfonso L. Herrera, Facultad de Ciencias, UNAM	D	1986	Santiago Comaltepec	3	P-OF
Rodentia	Cricetidae	Reithrodontomys	ND	ND	S	University of Kansas, Museum of Natural History	D	1962	Santiago Comaltepec	3	P-OF
Soricomorpha	Soricidae	Sorex	ND	ND	S	University of Kansas, Museum of Natural History	D	1975	Santiago Comaltepec	3	P-OF
Rodentia	Cricetidae	Nyctomys	sumichrasti	Nyctomys sumichrasti	S	Texas A & M University, Texas Cooperative Wildlife Collection	D	9999	Santiago Comaltepec	3	P-OF
Rodentia	Cricetidae	Nyctomys	sumichrasti	Nyctomys sumichrasti	S	University of Kansas, Museum of Natural History	D	1962	Santiago Comaltepec	3	P-OF
Rodentia	Cricetidae	Nyctomys	sumichrasti	Nyctomys sumichrasti	S	University of Kansas, Museum of Natural History	D	1964	Santiago Comaltepec	3	P-OF
Rodentia	Cricetidae	Nyctomys	sumichrasti	Nyctomys sumichrasti	S	University of Kansas, Museum of Natural History	D	1969	Santiago Comaltepec	3	P-OF
Rodentia	Cricetidae	Nyctomys	sumichrasti	Nyctomys sumichrasti	S	University of Kansas, Museum of Natural History	D	1970	Santiago Comaltepec	4	P-OF
Rodentia	Cricetidae	Nyctomys	sumichrasti	Nyctomys sumichrasti	S	University of Kansas, Museum of Natural History	D	1981	Santiago Comaltepec	3	P-OF
Rodentia	Cricetidae	Oligoryzomys	fulvescens	Oligoryzomys fulvescens	S	American Museum of Natural History	D	1968	Santiago Comaltepec	3	P-OF
Rodentia	Cricetidae	Oligoryzomys	fulvescens	Oligoryzomys fulvescens	S	University of Kansas, Museum of Natural History	D	1962	Santiago Comaltepec	3	P-OF
Rodentia	Cricetidae	Oligoryzomys	fulvescens	Oligoryzomys fulvescens	S	University of Kansas, Museum of Natural History	D	1970	Santiago Comaltepec	3	P-OF
Rodentia	Cricetidae	Oryzomys	couesi	Oryzomys couesi	S	University of Kansas, Museum of Natural History	D	1962	Santiago Comaltepec	3	P-OF
Rodentia	Cricetidae	Oryzomys	couesi	Oryzomys couesi	S	University of Kansas, Museum of Natural History	D	1975	Santiago Comaltepec	3	P-OF
Rodentia	Cricetidae	Oryzomys	couesi	Oryzomys couesi	S	Bulletin of The American Museum of Natural History	D	1969	Santiago Comaltepec	4	P-OF
Rodentia	Cricetidae	Oryzomys	couesi	Oryzomys couesi	S	Registro Bibliografico R Hall	D	1981	Santiago Comaltepec	4	P-OF
Rodentia	Cricetidae	Peromyscus	aztecus	Peromyscus aztecus	S	Carnegie Museum of Natural History	D	1979	Santiago Comaltepec	2	P-OF
Rodentia	Cricetidae	Peromyscus	aztecus	Peromyscus aztecus	S	Texas A & M University, Texas Cooperative Wildlife Collection	D	9999	Santiago Comaltepec	4	P-OF
Rodentia	Cricetidae	Peromyscus	aztecus	Peromyscus aztecus	S	University of Kansas, Museum of Natural History	D	1970	Santiago Comaltepec	3	P-OF
Rodentia	Cricetidae	Peromyscus	aztecus	Peromyscus aztecus	S	University of Kansas, Museum of Natural History	D	1970	Santiago Comaltepec	4	P-OF
Rodentia	Cricetidae	Peromyscus	aztecus	Peromyscus aztecus	S	Registro Bibliografico R Hall	D	1981	Santiago Comaltepec	4	P-OF
Rodentia	Cricetidae	Peromyscus	beatae	Peromyscus beatae	S	Texas A & M University, Texas Cooperative Wildlife Collection	D	9999	Santiago Comaltepec	4	P-OF
Rodentia	Cricetidae	Peromyscus	beatae	Peromyscus beatae	S	Texas A & M University, Texas Cooperative Wildlife Collection	D	9999	Santiago Comaltepec	4	P-OF
Rodentia	Cricetidae	Peromyscus	furvus	Peromyscus furvus	S	Texas Tech University, Museum of Texas Tech University	D	1974	San Pedro Yolox	3	P-OF
Rodentia	Cricetidae	Peromyscus	levipes	Peromyscus levipes	S	American Museum of Natural History	D	1963	Santiago Comaltepec	4	P-OF
Rodentia	Cricetidae	Peromyscus	levipes	Peromyscus levipes	S	American Museum of Natural History	D	1969	Santiago Comaltepec	3	P-OF
Rodentia	Cricetidae	Peromyscus	levipes	Peromyscus levipes	S	Coleccion Nacional de Mamiferos, Instituto de Biologia, UNAM	D	1987	Santiago Comaltepec	4	P-OF
Rodentia	Cricetidae	Peromyscus	levipes	Peromyscus levipes	S	Texas A & M University, Texas Cooperative Wildlife Collection	D	9999	Santiago Comaltepec	4	P-OF
Rodentia	Cricetidae	Peromyscus	levipes	Peromyscus levipes	S	University of Kansas, Museum of Natural History	D	1970	Santiago Comaltepec	4	P-OF
Rodentia	Cricetidae	Peromyscus	levipes	Peromyscus levipes	S	University of Kansas, Museum of Natural History	D	1970	Santiago Comaltepec	4	P-OF
Rodentia	Cricetidae	Peromyscus	maniculatus	Peromyscus maniculatus	S	University of Kansas, Museum of Natural History	D	1964	Santiago Comaltepec	3	P-OF
Rodentia	Cricetidae	Peromyscus	melanocarpus	Peromyscus melanocarpus	S	American Museum of Natural History	D	1979	Santiago Comaltepec	4	P-OF
Rodentia	Cricetidae	Peromyscus	melanocarpus	Peromyscus melanocarpus	S	Carnegie Museum of Natural History	D	1979	Santiago Comaltepec	2	P-OF
Rodentia	Cricetidae	Peromyscus	melanocarpus	Peromyscus melanocarpus	S	Coleccion Nacional de Mamiferos, Instituto de Biologia, UNAM	D	1989	Santiago Comaltepec	4	P-OF
Rodentia	Cricetidae	Peromyscus	melanocarpus	Peromyscus melanocarpus	S	Coleccion Nacional de Mamiferos, Instituto de Biologia, UNAM	D	1990	Santiago Comaltepec	4	P-OF
Rodentia	Cricetidae	Peromyscus	melanocarpus	Peromyscus melanocarpus	S	Escuela Nacional de Ciencias Biologicas	D	1964	Santiago Comaltepec	3	P-OF
Rodentia	Cricetidae	Peromyscus	melanocarpus	Peromyscus melanocarpus	S	Museo de Zoologia Alfonso L. Herrera, Facultad de Ciencias, UNAM	D	1987	Santiago Comaltepec	4	P-OF
Rodentia	Cricetidae	Peromyscus	melanocarpus	Peromyscus melanocarpus	S	Museo de Zoologia Alfonso L. Herrera, Facultad de Ciencias, UNAM	D	1987	Santiago Comaltepec	4	P-OF
Rodentia	Cricetidae	Peromyscus	melanocarpus	Peromyscus melanocarpus	S	Museo de Zoologia Alfonso L. Herrera, Facultad de Ciencias, UNAM	D	1987	Santiago Comaltepec	4	P-OF
Rodentia	Cricetidae	Peromyscus	melanocarpus	Peromyscus melanocarpus	S	Museo de Zoologia Alfonso L. Herrera, Facultad de Ciencias, UNAM	D	1987	Santiago Comaltepec	4	P-OF
Rodentia	Cricetidae	Peromyscus	melanocarpus	Peromyscus melanocarpus	S	Museo de Zoologia Alfonso L. Herrera, Facultad de Ciencias, UNAM	D	1987	Santiago Comaltepec	4	P-OF
Rodentia	Cricetidae	Peromyscus	melanocarpus	Peromyscus melanocarpus	S	Museo de Zoologia Alfonso L. Herrera, Facultad de Ciencias, UNAM	D	1987	Santiago Comaltepec	4	P-OF
Rodentia	Cricetidae	Peromyscus	melanocarpus	Peromyscus melanocarpus	S	Museo de Zoologia Alfonso L. Herrera, Facultad de Ciencias, UNAM	D	1988	Santiago Comaltepec	4	P-OF
Rodentia	Cricetidae	Peromyscus	melanocarpus	Peromyscus melanocarpus	S	Texas A & M University, Texas Cooperative Wildlife Collection	D	9999	Santiago Comaltepec	4	P-OF
Rodentia	Cricetidae	Peromyscus	melanocarpus	Peromyscus melanocarpus	S	Texas Tech University, Museum of Texas Tech University	D	1974	San Pedro Yolox	3	P-OF
Rodentia	Cricetidae	Peromyscus	melanocarpus	Peromyscus melanocarpus	S	University of Kansas, Museum of Natural History	D	1964	Santiago Comaltepec	3	P-OF
Rodentia	Cricetidae	Peromyscus	melanocarpus	Peromyscus melanocarpus	S	University of Kansas, Museum of Natural History	D	1964	Santiago Comaltepec	3	P-OF
Rodentia	Cricetidae	Peromyscus	melanocarpus	Peromyscus melanocarpus	S	University of Kansas, Museum of Natural History	D	1964	Santiago Comaltepec	3	P-OF
Rodentia	Cricetidae	Peromyscus	melanocarpus	Peromyscus melanocarpus	S	University of Kansas, Museum of Natural History	D	1969	Santiago Comaltepec	3	P-OF
Rodentia	Cricetidae	Peromyscus	melanocarpus	Peromyscus melanocarpus	S	University of Kansas, Museum of Natural History	D	1969	Santiago Comaltepec	3	P-OF
Rodentia	Cricetidae	Peromyscus	melanocarpus	Peromyscus melanocarpus	S	University of Kansas, Museum of Natural History	D	1969	Santiago Comaltepec	3	P-OF
Rodentia	Cricetidae	Peromyscus	melanocarpus	Peromyscus melanocarpus	S	University of Kansas, Museum of Natural History	D	1969	Santiago Comaltepec	3	P-OF
Rodentia	Cricetidae	Peromyscus	melanocarpus	Peromyscus melanocarpus	S	University of Kansas, Museum of Natural History	D	1970	Santiago Comaltepec	3	P-OF
Rodentia	Cricetidae	Peromyscus	melanocarpus	Peromyscus melanocarpus	S	University of Kansas, Museum of Natural History	D	1970	Santiago Comaltepec	3	P-OF
Rodentia	Cricetidae	Peromyscus	melanocarpus	Peromyscus melanocarpus	S	University of Kansas, Museum of Natural History	D	1970	Santiago Comaltepec	3	P-OF
Rodentia	Cricetidae	Peromyscus	melanocarpus	Peromyscus melanocarpus	S	University of Kansas, Museum of Natural History	D	1970	Santiago Comaltepec	3	P-OF
Rodentia	Cricetidae	Peromyscus	melanocarpus	Peromyscus melanocarpus	S	University of Kansas, Museum of Natural History	D	1970	Santiago Comaltepec	3	P-OF
Rodentia	Cricetidae	Peromyscus	melanocarpus	Peromyscus melanocarpus	S	University of Kansas, Museum of Natural History	D	1970	Santiago Comaltepec	3	P-OF
Rodentia	Cricetidae	Peromyscus	melanocarpus	Peromyscus melanocarpus	S	University of Kansas, Museum of Natural History	D	1970	Santiago Comaltepec	4	P-OF
Rodentia	Cricetidae	Peromyscus	melanocarpus	Peromyscus melanocarpus	S	University of Kansas, Museum of Natural History	D	1970	Santiago Comaltepec	4	P-OF
Rodentia	Cricetidae	Peromyscus	melanocarpus	Peromyscus melanocarpus	S	University of Kansas, Museum of Natural History	D	1970	Santiago Comaltepec	4	P-OF
Rodentia	Cricetidae	Peromyscus	melanocarpus	Peromyscus melanocarpus	S	University of Kansas, Museum of Natural History	D	1975	Santiago Comaltepec	3	P-OF
Rodentia	Cricetidae	Peromyscus	melanocarpus	Peromyscus melanocarpus	S	University of Kansas, Museum of Natural History	D	1975	Santiago Comaltepec	3	P-OF
Rodentia	Cricetidae	Peromyscus	melanocarpus	Peromyscus melanocarpus	S	University of Kansas, Museum of Natural History	D	1975	Santiago Comaltepec	3	P-OF
Rodentia	Cricetidae	Peromyscus	melanocarpus	Peromyscus melanocarpus	S	University of Kansas, Museum of Natural History	D	1975	Santiago Comaltepec	4	P-OF
Rodentia	Cricetidae	Peromyscus	melanocarpus	Peromyscus melanocarpus	S	University of Kansas, Museum of Natural History	D	1975	Santiago Comaltepec	4	P-OF
Rodentia	Cricetidae	Peromyscus	melanocarpus	Peromyscus melanocarpus	S	University of Kansas, Museum of Natural History	D	1975	Santiago Comaltepec	4	P-OF
Rodentia	Cricetidae	Peromyscus	melanocarpus	Peromyscus melanocarpus	S	University of Kansas, Museum of Natural History	D	1976	Santiago Comaltepec	4	P-OF
Rodentia	Cricetidae	Peromyscus	melanocarpus	Peromyscus melanocarpus	S	University of Kansas, Museum of Natural History	D	9999	Santiago Comaltepec	3	P-OF
Rodentia	Cricetidae	Peromyscus	melanocarpus	Peromyscus melanocarpus	S	University of Kansas, Museum of Natural History	D	9999	Santiago Comaltepec	3	P-OF
Rodentia	Cricetidae	Peromyscus	melanocarpus	Peromyscus melanocarpus	S	Registro Bibliografico R Hall	D	1981	Santiago Comaltepec	4	P-OF
Rodentia	Cricetidae	Peromyscus	mexicanus	Peromyscus mexicanus	S	American Museum of Natural History	D	1966	Santiago Comaltepec	3	P-OF
Rodentia	Cricetidae	Peromyscus	mexicanus	Peromyscus mexicanus	S	American Museum of Natural History	D	1967	Santiago Comaltepec	3	P-OF
Rodentia	Cricetidae	Peromyscus	mexicanus	Peromyscus mexicanus	S	Carnegie Museum of Natural History	D	1979	Santiago Comaltepec	3	P-OF
Rodentia	Cricetidae	Peromyscus	mexicanus	Peromyscus mexicanus	S	Coleccion Nacional de Mamiferos, Instituto de Biologia, UNAM	D	1962	Santiago Comaltepec	3	P-OF
Rodentia	Cricetidae	Peromyscus	mexicanus	Peromyscus mexicanus	S	Museo de Zoologia Alfonso L. Herrera, Facultad de Ciencias, UNAM	D	1987	Santiago Comaltepec	4	P-OF
Rodentia	Cricetidae	Peromyscus	mexicanus	Peromyscus mexicanus	S	Museo de Zoologia Alfonso L. Herrera, Facultad de Ciencias, UNAM	D	1987	Santiago Comaltepec	4	P-OF
Rodentia	Cricetidae	Peromyscus	mexicanus	Peromyscus mexicanus	S	Museo de Zoologia Alfonso L. Herrera, Facultad de Ciencias, UNAM	D	1987	Santiago Comaltepec	4	P-OF
Rodentia	Cricetidae	Peromyscus	mexicanus	Peromyscus mexicanus	S	Museo de Zoologia Alfonso L. Herrera, Facultad de Ciencias, UNAM	D	1987	Santiago Comaltepec	4	P-OF
Rodentia	Cricetidae	Peromyscus	mexicanus	Peromyscus mexicanus	S	Museo de Zoologia Alfonso L. Herrera, Facultad de Ciencias, UNAM	D	1987	Santiago Comaltepec	4	P-OF
Rodentia	Cricetidae	Peromyscus	mexicanus	Peromyscus mexicanus	S	Museo de Zoologia Alfonso L. Herrera, Facultad de Ciencias, UNAM	D	1987	Santiago Comaltepec	4	P-OF
Rodentia	Cricetidae	Peromyscus	mexicanus	Peromyscus mexicanus	S	Museo de Zoologia Alfonso L. Herrera, Facultad de Ciencias, UNAM	D	1988	Santiago Comaltepec	3	P-OF
Rodentia	Cricetidae	Peromyscus	mexicanus	Peromyscus mexicanus	S	Museo de Zoologia Alfonso L. Herrera, Facultad de Ciencias, UNAM	D	1988	Santiago Comaltepec	4	P-OF
Rodentia	Cricetidae	Peromyscus	mexicanus	Peromyscus mexicanus	S	Museo de Zoologia Alfonso L. Herrera, Facultad de Ciencias, UNAM	D	1988	Santiago Comaltepec	4	P-OF
Rodentia	Cricetidae	Peromyscus	mexicanus	Peromyscus mexicanus	S	Texas A & M University, Texas Cooperative Wildlife Collection	D	9999	Santiago Comaltepec	3	P-OF
Rodentia	Cricetidae	Peromyscus	mexicanus	Peromyscus mexicanus	S	University of California, Berkeley, Museum of Vertebrate Zoology	D	1981	Santiago Comaltepec	3	P-OF
Rodentia	Cricetidae	Peromyscus	mexicanus	Peromyscus mexicanus	S	University of Kansas, Museum of Natural History	D	1962	Santiago Comaltepec	3	P-OF
Rodentia	Cricetidae	Peromyscus	mexicanus	Peromyscus mexicanus	S	University of Kansas, Museum of Natural History	D	1964	Santiago Comaltepec	2	P-OF
Rodentia	Cricetidae	Peromyscus	mexicanus	Peromyscus mexicanus	S	University of Kansas, Museum of Natural History	D	1964	Santiago Comaltepec	3	P-OF
Rodentia	Cricetidae	Peromyscus	mexicanus	Peromyscus mexicanus	S	University of Kansas, Museum of Natural History	D	1964	Santiago Comaltepec	3	P-OF
Rodentia	Cricetidae	Peromyscus	mexicanus	Peromyscus mexicanus	S	University of Kansas, Museum of Natural History	D	1970	Santiago Comaltepec	3	P-OF
Rodentia	Cricetidae	Peromyscus	mexicanus	Peromyscus mexicanus	S	University of Kansas, Museum of Natural History	D	1970	Santiago Comaltepec	4	P-OF
Rodentia	Cricetidae	Peromyscus	mexicanus	Peromyscus mexicanus	S	University of Kansas, Museum of Natural History	D	1970	Santiago Comaltepec	4	P-OF
Rodentia	Cricetidae	Peromyscus	mexicanus	Peromyscus mexicanus	S	University of Kansas, Museum of Natural History	D	1975	Santiago Comaltepec	3	P-OF
Rodentia	Cricetidae	Peromyscus	mexicanus	Peromyscus mexicanus	S	University of Kansas, Museum of Natural History	D	1975	Santiago Comaltepec	3	P-OF
Rodentia	Cricetidae	Peromyscus	mexicanus	Peromyscus mexicanus	S	University of Kansas, Museum of Natural History	D	1975	Santiago Comaltepec	3	P-OF
Rodentia	Cricetidae	Peromyscus	mexicanus	Peromyscus mexicanus	S	University of Kansas, Museum of Natural History	D	1975	Santiago Comaltepec	3	P-OF
Rodentia	Cricetidae	Reithrodontomys	fulvescens	Reithrodontomys fulvescens	S	American Museum of Natural History	D	1969	Santiago Comaltepec	4	P-OF
Rodentia	Cricetidae	Reithrodontomys	mexicanus	Reithrodontomys mexicanus	S	American Museum of Natural History	D	1967	Santiago Comaltepec	3	P-OF
Rodentia	Cricetidae	Reithrodontomys	mexicanus	Reithrodontomys mexicanus	S	American Museum of Natural History	D	1968	Santiago Comaltepec	3	P-OF
Rodentia	Cricetidae	Reithrodontomys	mexicanus	Reithrodontomys mexicanus	S	American Museum of Natural History	D	1972	Santiago Comaltepec	3	P-OF
Rodentia	Cricetidae	Reithrodontomys	mexicanus	Reithrodontomys mexicanus	S	Museo de Zoologia Alfonso L. Herrera, Facultad de Ciencias, UNAM	D	1987	Santiago Comaltepec	3	P-OF
Rodentia	Cricetidae	Reithrodontomys	mexicanus	Reithrodontomys mexicanus	S	Museo de Zoologia Alfonso L. Herrera, Facultad de Ciencias, UNAM	D	1987	Santiago Comaltepec	4	P-OF
Rodentia	Cricetidae	Reithrodontomys	mexicanus	Reithrodontomys mexicanus	S	Universidad de Michigan, Museo de Zoologia, Ann Arbor	D	9999	Santiago Comaltepec	4	P-OF
Rodentia	Cricetidae	Reithrodontomys	mexicanus	Reithrodontomys mexicanus	S	University of Kansas, Museum of Natural History	D	1962	Santiago Comaltepec	3	P-OF
Rodentia	Cricetidae	Reithrodontomys	mexicanus	Reithrodontomys mexicanus	S	University of Kansas, Museum of Natural History	D	1964	Santiago Comaltepec	3	P-OF
Rodentia	Cricetidae	Reithrodontomys	mexicanus	Reithrodontomys mexicanus	S	University of Kansas, Museum of Natural History	D	1964	Santiago Comaltepec	3	P-OF
Rodentia	Cricetidae	Reithrodontomys	mexicanus	Reithrodontomys mexicanus	S	University of Kansas, Museum of Natural History	D	1970	Santiago Comaltepec	3	P-OF
Rodentia	Cricetidae	Reithrodontomys	mexicanus	Reithrodontomys mexicanus	S	University of Kansas, Museum of Natural History	D	1970	Santiago Comaltepec	3	P-OF
Rodentia	Cricetidae	Reithrodontomys	mexicanus	Reithrodontomys mexicanus	S	University of Kansas, Museum of Natural History	D	1970	Santiago Comaltepec	3	P-OF
Rodentia	Cricetidae	Reithrodontomys	mexicanus	Reithrodontomys mexicanus	S	University of Kansas, Museum of Natural History	D	1970	Santiago Comaltepec	4	P-OF
Rodentia	Cricetidae	Reithrodontomys	mexicanus	Reithrodontomys mexicanus	S	University of Kansas, Museum of Natural History	D	1970	Santiago Comaltepec	4	P-OF
Rodentia	Cricetidae	Reithrodontomys	mexicanus	Reithrodontomys mexicanus	S	University of Kansas, Museum of Natural History	D	1975	Santiago Comaltepec	3	P-OF
Rodentia	Cricetidae	Reithrodontomys	mexicanus	Reithrodontomys mexicanus	S	Registro Bibliografico R Hall	D	1981	Santiago Comaltepec	4	P-OF
Rodentia	Cricetidae	Reithrodontomys	microdon	Reithrodontomys microdon	S	University of Kansas, Museum of Natural History	D	1962	Santiago Comaltepec	3	P-OF
Rodentia	Cricetidae	Reithrodontomys	microdon	Reithrodontomys microdon	S	University of Kansas, Museum of Natural History	D	1964	Santiago Comaltepec	3	P-OF
Rodentia	Cricetidae	Reithrodontomys	microdon	Reithrodontomys microdon	S	University of Kansas, Museum of Natural History	D	1969	Santiago Comaltepec	3	P-OF
Rodentia	Cricetidae	Reithrodontomys	microdon	Reithrodontomys microdon	S	University of Kansas, Museum of Natural History	D	1969	Santiago Comaltepec	4	P-OF
Rodentia	Cricetidae	Reithrodontomys	microdon	Reithrodontomys microdon	S	University of Kansas, Museum of Natural History	D	1970	Santiago Comaltepec	3	P-OF
Rodentia	Cricetidae	Reithrodontomys	microdon	Reithrodontomys microdon	S	University of Kansas, Museum of Natural History	D	1970	Santiago Comaltepec	4	P-OF
Rodentia	Cricetidae	Reithrodontomys	microdon	Reithrodontomys microdon	S	University of Kansas, Museum of Natural History	D	1970	Santiago Comaltepec	4	P-OF
Rodentia	Cricetidae	Reithrodontomys	microdon	Reithrodontomys microdon	S	Registro Bibliografico R Hall	D	1981	Santiago Comaltepec	3	P-OF
Rodentia	Cricetidae	Reithrodontomys	microdon	Reithrodontomys microdon	S	Registro Bibliografico R Hall	D	1981	Santiago Comaltepec	4	P-OF
Rodentia	Cricetidae	Reithrodontomys	sumichrasti	Reithrodontomys sumichrasti	S	American Museum of Natural History	D	1968	Santiago Comaltepec	3	P-OF
Rodentia	Cricetidae	Sigmodon	hispidus	Sigmodon hispidus	S	University of Kansas, Museum of Natural History	D	1964	Santiago Comaltepec	2	P-OF
Rodentia	Cricetidae	Sigmodon	hispidus	Sigmodon hispidus	S	Bulletin of The American Museum of Natural History	D	1969	San Juan Bautista Valle Nacional	3	P-OF
Rodentia	Cricetidae	Sigmodon	toltecus	Sigmodon toltecus	S	Texas A & M University, Texas Cooperative Wildlife Collection	D	9999	Santiago Comaltepec	3	P-OF
Soricomorpha	Soricidae	Sorex	veraepacis	Sorex veraepacis	S	American Museum of Natural History	D	1979	Santiago Comaltepec	4	P-OF
Soricomorpha	Soricidae	Sorex	veraepacis	Sorex veraepacis	S	University of Kansas, Museum of Natural History	D	1964	Santiago Comaltepec	3	P-OF
Soricomorpha	Soricidae	Sorex	veraepacis	Sorex veraepacis	S	University of Kansas, Museum of Natural History	D	1969	Santiago Comaltepec	3	P-OF
Soricomorpha	Soricidae	Sorex	veraepacis	Sorex veraepacis	S	University of Kansas, Museum of Natural History	D	1969	Santiago Comaltepec	4	P-OF
Soricomorpha	Soricidae	Sorex	veraepacis	Sorex veraepacis	S	University of Kansas, Museum of Natural History	D	1970	Santiago Comaltepec	3	P-OF
Soricomorpha	Soricidae	Sorex	veraepacis	Sorex veraepacis	S	University of Kansas, Museum of Natural History	D	1970	Santiago Comaltepec	4	P-OF
Soricomorpha	Soricidae	Sorex	veraepacis	Sorex veraepacis	S	University of Kansas, Museum of Natural History	D	1970	Santiago Comaltepec	4	P-OF
Soricomorpha	Soricidae	Sorex	veraepacis	Sorex veraepacis	S	University of Kansas, Museum of Natural History	D	1970	Santiago Comaltepec	4	P-OF
Soricomorpha	Soricidae	Sorex	veraepacis	Sorex veraepacis	S	University of Kansas, Museum of Natural History	D	1975	Santiago Comaltepec	4	P-OF
Soricomorpha	Soricidae	Sorex	veraepacis	Sorex veraepacis	S	University of Michigan Museum of Zoology	D	1964	Santiago Comaltepec	4	P-OF
Rodentia	Cricetidae	Tylomys	nudicaudus	Tylomys nudicaudus	S	American Museum of Natural History	D	1967	Santiago Comaltepec	3	P-OF
Rodentia	Cricetidae	Tylomys	nudicaudus	Tylomys nudicaudus	S	University of Kansas, Museum of Natural History	D	1964	Santiago Comaltepec	2	P-OF
Rodentia	Cricetidae	Tylomys	nudicaudus	Tylomys nudicaudus	S	University of Kansas, Museum of Natural History	D	1964	Santiago Comaltepec	3	P-OF
Rodentia	Cricetidae	Tylomys	nudicaudus	Tylomys nudicaudus	S	University of Kansas, Museum of Natural History	D	1970	Santiago Comaltepec	3	P-OF
Soricomorpha	Soricidae	Cryptotis	magna	Cryptotis magna	S	Natural History Museum of Los Angeles County	D	1986	San Lucas Ojitlan	1	TRF
Soricomorpha	Soricidae	Cryptotis	magna	Cryptotis magna	S	University of Kansas, Museum of Natural History	D	1970	Santiago Comaltepec	2	TRF
Rodentia	Cricetidae	Handleyomys	alfaroi	Handleyomys alfaroi	S	Museo de Zoologia Alfonso L. Herrera, Facultad de Ciencias, UNAM	D	1987	Santiago Comaltepec	2	TRF
Rodentia	Cricetidae	Handleyomys	alfaroi	Handleyomys alfaroi	S	University of Kansas, Museum of Natural History	D	1970	Santiago Comaltepec	2	TRF
Rodentia	Cricetidae	Handleyomys	chapmani	Handleyomys chapmani	S	American Museum of Natural History	D	1965	Santiago Comaltepec	3	TRF
Rodentia	Cricetidae	Handleyomys	chapmani	Handleyomys chapmani	S	Coleccion Nacional de Mamiferos, Instituto de Biologia, UNAM	D	1989	Santiago Comaltepec	3	TRF
Rodentia	Cricetidae	Handleyomys	chapmani	Handleyomys chapmani	S	University of Michigan, Museum of Zoology	D	1968	San Juan Bautista Valle Nacional	2	TRF
Rodentia	Cricetidae	Handleyomys	chapmani	Handleyomys chapmani	S	Bulletin of The American Museum of Natural History	D	1969	Santiago Comaltepec	2	TRF
Rodentia	Cricetidae	Handleyomys	chapmani	Handleyomys chapmani	S	Registro Bibliografico R Hall	D	1981	San Juan Bautista Valle Nacional	2	TRF
Rodentia	Cricetidae	Handleyomys	rostratus	Handleyomys rostratus	S	Texas A & M University, Texas Cooperative Wildlife Collection	D	9999	San Lucas Ojitlan	1	TRF
Rodentia	Heteromyidae	Heteromys	desmarestianus	Heteromys desmarestianus	S	Coleccion Nacional de Mamiferos, Instituto de Biologia, UNAM	D	1989	Santiago Comaltepec	3	TRF
Rodentia	Heteromyidae	Heteromys	desmarestianus	Heteromys desmarestianus	S	Museo de Zoologia Alfonso L. Herrera, Facultad de Ciencias, UNAM	D	1987	San Juan Bautista Valle Nacional	1	TRF
Rodentia	Heteromyidae	Heteromys	desmarestianus	Heteromys desmarestianus	S	Museo de Zoologia Alfonso L. Herrera, Facultad de Ciencias, UNAM	D	1987	San Juan Bautista Valle Nacional	1	TRF
Rodentia	Heteromyidae	Heteromys	desmarestianus	Heteromys desmarestianus	S	Museo de Zoologia Alfonso L. Herrera, Facultad de Ciencias, UNAM	D	1987	San Juan Bautista Valle Nacional	2	TRF
Rodentia	Heteromyidae	Heteromys	desmarestianus	Heteromys desmarestianus	S	Museo de Zoologia Alfonso L. Herrera, Facultad de Ciencias, UNAM	D	1987	Santiago Comaltepec	2	TRF
Rodentia	Heteromyidae	Heteromys	desmarestianus	Heteromys desmarestianus	S	Museo de Zoologia Alfonso L. Herrera, Facultad de Ciencias, UNAM	D	1987	Santiago Comaltepec	3	TRF
Rodentia	Heteromyidae	Heteromys	desmarestianus	Heteromys desmarestianus	S	Museo de Zoologia Alfonso L. Herrera, Facultad de Ciencias, UNAM	D	1988	Santiago Comaltepec	3	TRF
Rodentia	Heteromyidae	Heteromys	desmarestianus	Heteromys desmarestianus	S	Museo de Zoologia Alfonso L. Herrera, Facultad de Ciencias, UNAM	D	1989	Santiago Comaltepec	3	TRF
Rodentia	Heteromyidae	Heteromys	desmarestianus	Heteromys desmarestianus	S	Texas A & M University, Texas Cooperative Wildlife Collection	D	9999	San Lucas Ojitlan	1	TRF
Rodentia	Heteromyidae	Heteromys	desmarestianus	Heteromys desmarestianus	S	University of Kansas, Museum of Natural History	D	1964	San Juan Bautista Valle Nacional	1	TRF
Rodentia	Heteromyidae	Heteromys	desmarestianus	Heteromys desmarestianus	S	University of Kansas, Museum of Natural History	D	1970	Santiago Comaltepec	2	TRF
Rodentia	Heteromyidae	Heteromys	desmarestianus	Heteromys desmarestianus	S	University of Michigan, Museum of Zoology	D	1968	San Juan Bautista Valle Nacional	2	TRF
Rodentia	Heteromyidae	Heteromys	desmarestianus	Heteromys desmarestianus	S	Anales del Instituto de Biologia	D	2001	San Juan Lana	1	TRF
Didelphimorphia	Didelphidae	Marmosa	mexicana	Marmosa mexicana	S	University of Kansas, Museum of Natural History	D	1964	San Juan Bautista Valle Nacional	2	TRF
Didelphimorphia	Didelphidae	Marmosa	mexicana	Marmosa mexicana	S	University of Kansas, Museum of Natural History	D	1970	Santiago Comaltepec	2	TRF
Didelphimorphia	Didelphidae	Marmosa	mexicana	Marmosa mexicana	S	Bulletin of The American Museum of Natural History	D	1969	Santiago Comaltepec	2	TRF
Didelphimorphia	Didelphidae	Marmosa	mexicana	Marmosa mexicana	S	Registro Bibliografico R Hall	D	1981	San Juan Bautista Valle Nacional	2	TRF
Rodentia	Cricetidae	Microtus	ND	ND	S	American Museum of Natural History	D	1965	Santiago Comaltepec	3	TRF
Rodentia	Cricetidae	Peromyscus	ND	ND	S	Museo de Zoologia Alfonso L. Herrera, Facultad de Ciencias, UNAM	D	1987	Santiago Comaltepec	3	TRF
Rodentia	Cricetidae	Nyctomys	sumichrasti	Nyctomys sumichrasti	S	Bulletin of The American Museum of Natural History	D	1969	San Jose Chiltepec	1	TRF
Rodentia	Cricetidae	Oryzomys	couesi	Oryzomys couesi	S	American Museum of Natural History	D	1961	Santiago Comaltepec	2	TRF
Rodentia	Cricetidae	Oryzomys	couesi	Oryzomys couesi	S	Texas A & M University, Texas Cooperative Wildlife Collection	D	9999	San Lucas Ojitlan	1	TRF
Rodentia	Cricetidae	Oryzomys	couesi	Oryzomys couesi	S	University of Michigan, Museum of Zoology	D	1964	San Juan Bautista Valle Nacional	2	TRF
Rodentia	Cricetidae	Oryzomys	couesi	Oryzomys couesi	S	University of Michigan, Museum of Zoology	D	1968	San Juan Bautista Valle Nacional	2	TRF
Rodentia	Cricetidae	Oryzomys	couesi	Oryzomys couesi	S	Bulletin of The American Museum of Natural History	D	1969	San Jose Chiltepec	1	TRF
Rodentia	Cricetidae	Peromyscus	melanocarpus	Peromyscus melanocarpus	S	Museo de Zoologia Alfonso L. Herrera, Facultad de Ciencias, UNAM	D	1987	San Pedro Yolox	4	TRF
Rodentia	Cricetidae	Peromyscus	melanocarpus	Peromyscus melanocarpus	S	Museo de Zoologia Alfonso L. Herrera, Facultad de Ciencias, UNAM	D	1988	Santiago Comaltepec	3	TRF
Rodentia	Cricetidae	Peromyscus	melanocarpus	Peromyscus melanocarpus	S	Bulletin of The American Museum of Natural History	D	1969	Santiago Comaltepec	2	TRF
Rodentia	Cricetidae	Peromyscus	mexicanus	Peromyscus mexicanus	S	American Museum of Natural History	D	1965	Santiago Comaltepec	3	TRF
Rodentia	Cricetidae	Peromyscus	mexicanus	Peromyscus mexicanus	S	American Museum of Natural History	D	1966	Santiago Comaltepec	3	TRF
Rodentia	Cricetidae	Peromyscus	mexicanus	Peromyscus mexicanus	S	Coleccion Nacional de Mamiferos, Instituto de Biologia, UNAM	D	1964	San Juan Bautista Valle Nacional	2	TRF
Rodentia	Cricetidae	Peromyscus	mexicanus	Peromyscus mexicanus	S	Coleccion Nacional de Mamiferos, Instituto de Biologia, UNAM	D	1989	Santiago Comaltepec	3	TRF
Rodentia	Cricetidae	Peromyscus	mexicanus	Peromyscus mexicanus	S	Museo de Zoologia Alfonso L. Herrera, Facultad de Ciencias, UNAM	D	1987	San Juan Bautista Valle Nacional	1	TRF
Rodentia	Cricetidae	Peromyscus	mexicanus	Peromyscus mexicanus	S	Museo de Zoologia Alfonso L. Herrera, Facultad de Ciencias, UNAM	D	1987	San Juan Bautista Valle Nacional	2	TRF
Rodentia	Cricetidae	Peromyscus	mexicanus	Peromyscus mexicanus	S	Museo de Zoologia Alfonso L. Herrera, Facultad de Ciencias, UNAM	D	1987	Santiago Comaltepec	1	TRF
Rodentia	Cricetidae	Peromyscus	mexicanus	Peromyscus mexicanus	S	Museo de Zoologia Alfonso L. Herrera, Facultad de Ciencias, UNAM	D	1987	Santiago Comaltepec	2	TRF
Rodentia	Cricetidae	Peromyscus	mexicanus	Peromyscus mexicanus	S	Museo de Zoologia Alfonso L. Herrera, Facultad de Ciencias, UNAM	D	1987	Santiago Comaltepec	3	TRF
Rodentia	Cricetidae	Peromyscus	mexicanus	Peromyscus mexicanus	S	Museo de Zoologia Alfonso L. Herrera, Facultad de Ciencias, UNAM	D	1988	Santiago Comaltepec	3	TRF
Rodentia	Cricetidae	Peromyscus	mexicanus	Peromyscus mexicanus	S	Museo de Zoologia Alfonso L. Herrera, Facultad de Ciencias, UNAM	D	1989	Santiago Comaltepec	3	TRF
Rodentia	Cricetidae	Peromyscus	mexicanus	Peromyscus mexicanus	S	Museo de Zoologia Alfonso L. Herrera, Facultad de Ciencias, UNAM	D	1989	Santiago Comaltepec	3	TRF
Rodentia	Cricetidae	Peromyscus	mexicanus	Peromyscus mexicanus	S	Texas A & M University, Texas Cooperative Wildlife Collection	D	9999	San Juan Bautista Valle Nacional	2	TRF
Rodentia	Cricetidae	Peromyscus	mexicanus	Peromyscus mexicanus	S	Texas A & M University, Texas Cooperative Wildlife Collection	D	9999	San Lucas Ojitlan	1	TRF
Rodentia	Cricetidae	Peromyscus	mexicanus	Peromyscus mexicanus	S	University of Kansas, Museum of Natural History	D	1964	San Juan Bautista Valle Nacional	1	TRF
Rodentia	Cricetidae	Peromyscus	mexicanus	Peromyscus mexicanus	S	University of Kansas, Museum of Natural History	D	1964	San Juan Bautista Valle Nacional	2	TRF
Rodentia	Cricetidae	Peromyscus	mexicanus	Peromyscus mexicanus	S	University of Kansas, Museum of Natural History	D	1975	San Juan Bautista Valle Nacional	1	TRF
Rodentia	Cricetidae	Peromyscus	mexicanus	Peromyscus mexicanus	S	University of Kansas, Museum of Natural History	D	1970	Santiago Comaltepec	2	TRF
Rodentia	Cricetidae	Peromyscus	mexicanus	Peromyscus mexicanus	S	University of Michigan, Museum of Zoology	D	1964	San Juan Bautista Valle Nacional	2	TRF
Rodentia	Cricetidae	Peromyscus	mexicanus	Peromyscus mexicanus	S	University of Michigan, Museum of Zoology	D	1968	San Juan Bautista Valle Nacional	2	TRF
Rodentia	Cricetidae	Peromyscus	mexicanus	Peromyscus mexicanus	S	Anales del Instituto de Biologia	D	2001	San Juan Bautista Valle Nacional	1	TRF
Rodentia	Cricetidae	Peromyscus	mexicanus	Peromyscus mexicanus	S	Bulletin of The American Museum of Natural History	D	1969	Santiago Comaltepec	2	TRF
Rodentia	Cricetidae	Reithrodontomys	fulvescens	Reithrodontomys fulvescens	S	University of Michigan, Museum of Zoology	D	1964	San Juan Bautista Valle Nacional	2	TRF
Rodentia	Cricetidae	Reithrodontomys	mexicanus	Reithrodontomys mexicanus	S	American Museum of Natural History	D	1965	Santiago Comaltepec	3	TRF
Rodentia	Cricetidae	Reithrodontomys	mexicanus	Reithrodontomys mexicanus	S	American Museum of Natural History	D	1966	Santiago Comaltepec	3	TRF
Rodentia	Cricetidae	Reithrodontomys	mexicanus	Reithrodontomys mexicanus	S	Coleccion Nacional de Mamiferos, Instituto de Biologia, UNAM	D	1989	Santiago Comaltepec	3	TRF
Rodentia	Cricetidae	Reithrodontomys	mexicanus	Reithrodontomys mexicanus	S	University of Kansas, Museum of Natural History	D	1964	San Juan Bautista Valle Nacional	2	TRF
Rodentia	Cricetidae	Reithrodontomys	sumichrasti	Reithrodontomys sumichrasti	S	American Museum of Natural History	D	1969	Santiago Comaltepec	3	TRF
Rodentia	Cricetidae	Sigmodon	hispidus	Sigmodon hispidus	S	American Museum of Natural History	D	1961	San Juan Bautista Valle Nacional	1	TRF
Rodentia	Cricetidae	Sigmodon	hispidus	Sigmodon hispidus	S	Coleccion Nacional de Mamiferos, Instituto de Biologia, UNAM	D	1979	San Lucas Ojitlan	1	TRF
Rodentia	Cricetidae	Sigmodon	hispidus	Sigmodon hispidus	S	Museo de Zoologia Alfonso L. Herrera, Facultad de Ciencias, UNAM	D	1987	Santiago Comaltepec	2	TRF
Rodentia	Cricetidae	Sigmodon	hispidus	Sigmodon hispidus	S	Texas A & M University, Texas Cooperative Wildlife Collection	D	9999	San Lucas Ojitlan	1	TRF
Rodentia	Cricetidae	Sigmodon	hispidus	Sigmodon hispidus	S	University of Kansas, Museum of Natural History	D	1964	San Juan Bautista Valle Nacional	2	TRF
Rodentia	Cricetidae	Sigmodon	hispidus	Sigmodon hispidus	S	University of Michigan, Museum of Zoology	D	1964	San Juan Bautista Valle Nacional	2	TRF
Rodentia	Cricetidae	Sigmodon	hispidus	Sigmodon hispidus	S	Bulletin of The American Museum of Natural History	D	1969	San Juan Bautista Valle Nacional	1	TRF
Rodentia	Cricetidae	Sigmodon	mascotensis	Sigmodon mascotensis	S	MZFC_Actualización de la base de datos de la Colección de mamíferos del Museo de Zoología 'Alfonso L. Herrera'	D	1988	SAN JOSE CHILTEPEC	1	TRF
Rodentia	Cricetidae	Sigmodon	mascotensis	Sigmodon mascotensis	S	MZFC_Actualización de la base de datos de la Colección de mamíferos del Museo de Zoología 'Alfonso L. Herrera'	D	1987	SANTIAGO COMALTEPEC	1	TRF
Rodentia	Cricetidae	Sigmodon	mascotensis	Sigmodon mascotensis	S	MZFC_Actualización de la base de datos de la Colección de mamíferos del Museo de Zoología 'Alfonso L. Herrera'	D	1987	SANTIAGO COMALTEPEC	1	TRF
Rodentia	Cricetidae	Sigmodon	toltecus	Sigmodon toltecus	S	Texas A & M University, Texas Cooperative Wildlife Collection	D	9999	San Lucas Ojitlan	1	TRF
Soricomorpha	Soricidae	Sorex	veraecrucis	Sorex veraecrucis	S	University of Kansas, Museum of Natural History	D	1964	Santiago Comaltepec	3	TRF
Soricomorpha	Soricidae	Sorex	veraecrucis	Sorex veraecrucis	S	University of Kansas, Museum of Natural History	D	1969	Santiago Comaltepec	3	TRF
Soricomorpha	Soricidae	Sorex	veraecrucis	Sorex veraecrucis	S	University of Kansas, Museum of Natural History	D	1969	Santiago Comaltepec	3	TRF
Soricomorpha	Soricidae	Sorex	veraepacis	Sorex veraepacis	S	University of Kansas, Museum of Natural History	D	1969	Santiago Comaltepec	3	TRF
Rodentia	Cricetidae	Tylomys	nudicaudus	Tylomys nudicaudus	S	American Museum of Natural History	D	1968	Santiago Comaltepec	3	TRF
Rodentia	Cricetidae	Tylomys	nudicaudus	Tylomys nudicaudus	S	University of Kansas, Museum of Natural History	D	1964	San Juan Bautista Valle Nacional	1	TRF
Rodentia	Cricetidae	Tylomys	nudicaudus	Tylomys nudicaudus	S	University of Michigan, Museum of Zoology	D	1968	San Juan Bautista Valle Nacional	2	TRF
Rodentia	Cricetidae	Tylomys	nudicaudus	Tylomys nudicaudus	S	Registro Bibliografico R Hall	D	1981	San Juan Bautista Valle Nacional	2	TRF
Rodentia	Cricetidae	Nyctomys	sumichrasti	Nyctomys sumichrasti	S	American Museum of Natural History	D	1962	San Jose Chiltepec	1	SDTF
Rodentia	Cricetidae	Nyctomys	sumichrasti	Nyctomys sumichrasti	S	Bulletin of The American Museum of Natural History	D	1969	San Jose Chiltepec	1	SDTF
Rodentia	Cricetidae	Oryzomys	couesi	Oryzomys couesi	S	American Museum of Natural History	D	1962	San Jose Chiltepec	1	SDTF
Rodentia	Cricetidae	Oryzomys	couesi	Oryzomys couesi	S	Bulletin of The American Museum of Natural History	D	1969	San Jose Chiltepec	1	SDTF
Rodentia	Cricetidae	Peromyscus	mexicanus	Peromyscus mexicanus	S	American Museum of Natural History	D	1962	San Jose Chiltepec	1	SDTF
Rodentia	Cricetidae	Sigmodon	hispidus	Sigmodon hispidus	S	American Museum of Natural History	D	1962	San Jose Chiltepec	1	SDTF
Rodentia	Cricetidae	Sigmodon	hispidus	Sigmodon hispidus	S	Museo de Zoologia Alfonso L. Herrera, Facultad de Ciencias, UNAM	D	1987	San Jose Chiltepec	1	SDTF
Rodentia	Cricetidae	Sigmodon	hispidus	Sigmodon hispidus	S	Texas Tech University, Museum of Texas Tech University	D	1974	San Juan Bautista Valle Nacional	1	SDTF
Rodentia	Cricetidae	Sigmodon	hispidus	Sigmodon hispidus	S	Bulletin of The American Museum of Natural History	D	1969	San Jose Chiltepec	1	SDTF
Rodentia	Cricetidae	Sigmodon	hispidus	Sigmodon hispidus	S	Bulletin of The American Museum of Natural History	D	1969	San Jose Chiltepec	1	SDTF
Rodentia	Cricetidae	Handleyomys	chapmani	Handleyomys chapmani	S	Carnegie Museum of Natural History	D	1979	Santiago Comaltepec	3	ND
Rodentia	Cricetidae	Handleyomys	melanotis	Handleyomys melanotis	S	Actualización de la base de datos del Atlas Mastozoológico de México	D	9999		1	ND
Rodentia	Cricetidae	Oryzomys	couesi	Oryzomys couesi	S	University of Kansas, Museum of Natural History	D	1975	Santiago Comaltepec	3	ND
Rodentia	Cricetidae	Peromyscus	beatae	Peromyscus beatae	S	Texas A & M University, Texas Cooperative Wildlife Collection	D	9999	Santiago Comaltepec	4	ND
Rodentia	Cricetidae	Peromyscus	furvus	Peromyscus furvus	S	Texas Tech University, Museum of Texas Tech University	D	1974	San Pedro Yolox	3	ND
Rodentia	Cricetidae	Peromyscus	melanocarpus	Peromyscus melanocarpus	S	Coleccion Nacional de Mamiferos, Instituto de Biologia, UNAM	D	1989	Santiago Comaltepec	3	ND
Rodentia	Cricetidae	Peromyscus	melanocarpus	Peromyscus melanocarpus	S	Museo de Zoologia Alfonso L. Herrera, Facultad de Ciencias, UNAM	D	1987	Santiago Comaltepec	3	ND
Rodentia	Cricetidae	Peromyscus	mexicanus	Peromyscus mexicanus	S	Carnegie Museum of Natural History	D		Santiago Comaltepec	3	ND
Rodentia	Cricetidae	Peromyscus	mexicanus	Peromyscus mexicanus	S	University of Kansas, Museum of Natural History	D	1962	Santiago Comaltepec	3	ND
Rodentia	Cricetidae	Sigmodon	hispidus	Sigmodon hispidus	S	University of Kansas, Museum of Natural History	D	1964	Santiago Comaltepec	2	ND
Rodentia	Cricetidae	Handleyomys	chapmani	Handleyomys chapmani	S	Bulletin of The American Museum of Natural History	D	1969	San Jose Chiltepec	2	PAS
Chiroptera	Phyllostomidae	Anoura	geoffroyi	Anoura geoffroyi	B	Museo de Zoologia Alfonso L. Herrera, Facultad de Ciencias, UNAM	D	1988	Santiago Comaltepec	3	MCF
Chiroptera	Phyllostomidae	Carollia	perspicillata	Carollia perspicillata	B	Museo de Zoologia Alfonso L. Herrera, Facultad de Ciencias, UNAM	D	1987	Santiago Comaltepec	3	MCF
Chiroptera	Phyllostomidae	Carollia	sowelli	Carollia sowelli	B	Museo de Zoologia Alfonso L. Herrera, Facultad de Ciencias, UNAM	D	1987	Santiago Comaltepec	3	MCF
Chiroptera	Phyllostomidae	Carollia	sowelli	Carollia sowelli	B	Museo de Zoologia Alfonso L. Herrera, Facultad de Ciencias, UNAM	D	1988	Santiago Comaltepec	3	MCF
Chiroptera	Phyllostomidae	Dermanura	toltecus	Dermanura tolteca	B	Museo de Zoologia Alfonso L. Herrera, Facultad de Ciencias, UNAM	D	1987	Santiago Comaltepec	3	MCF
Chiroptera	Phyllostomidae	Dermanura	toltecus	Dermanura tolteca	B	Museo de Zoologia Alfonso L. Herrera, Facultad de Ciencias, UNAM	D	1987	Santiago Comaltepec	3	MCF
Chiroptera	Phyllostomidae	Dermanura	toltecus	Dermanura tolteca	B	Registro Bibliografico R Hall	D	1981	Santiago Comaltepec	3	MCF
Chiroptera	Phyllostomidae	Glossophaga	soricina	Glossophaga soricina	B	Museo de Zoologia Alfonso L. Herrera, Facultad de Ciencias, UNAM	D	1987	Santiago Comaltepec	3	MCF
Chiroptera	Phyllostomidae	Glossophaga	soricina	Glossophaga soricina	B	Museo de Zoologia Alfonso L. Herrera, Facultad de Ciencias, UNAM	D	1988	Santiago Comaltepec	3	MCF
Chiroptera	Phyllostomidae	Glossophaga	soricina	Glossophaga soricina	B	Texas Tech University, Museum of Texas Tech University	D	1974	Santiago Comaltepec	3	MCF
Chiroptera	Phyllostomidae	Glossophaga	soricina	Glossophaga soricina	B	Texas Tech University, Museum of Texas Tech University	D	1974	Santiago Comaltepec	3	MCF
Chiroptera	Phyllostomidae	Hylonycteris	underwoodi	Hylonycteris underwoodi	B	University of Kansas, Museum of Natural History	D	1964	Santiago Comaltepec	3	MCF
Chiroptera	Phyllostomidae	Hylonycteris	underwoodi	Hylonycteris underwoodi	B	Registro Bibliografico R Hall	D	1981	Santiago Comaltepec	3	MCF
Chiroptera	Phyllostomidae	Hylonycteris	underwoodi	Hylonycteris underwoodi	B	Registro Bibliografico R Hall	D	1981	Santiago Comaltepec	3	MCF
Chiroptera	Vespertilionidae	Myotis	keaysi	Myotis keaysi	B	Registro Bibliografico R Hall	D	1981	Santiago Comaltepec	3	MCF
Chiroptera	Vespertilionidae	Myotis	nigricans	Myotis nigricans	B	Museo de Zoologia Alfonso L. Herrera, Facultad de Ciencias, UNAM	D	1987	San Pedro Yolox	3	MCF
Chiroptera	Vespertilionidae	Myotis	nigricans	Myotis nigricans	B	Museo de Zoologia Alfonso L. Herrera, Facultad de Ciencias, UNAM	D	1987	Santiago Comaltepec	3	MCF
Chiroptera	Phyllostomidae	Glossophaga	ND	ND	B	Museo de Zoologia Alfonso L. Herrera, Facultad de Ciencias, UNAM	D	1987	Santiago Comaltepec	3	MCF
Chiroptera	Phyllostomidae	Sturnira	hondurensis	Sturnira hondurensis	B	Coleccion Nacional de Mamiferos, Instituto de Biologia, UNAM	D	1964	Santiago Comaltepec	3	MCF
Chiroptera	Phyllostomidae	Sturnira	hondurensis	Sturnira hondurensis	B	Coleccion Nacional de Mamiferos, Instituto de Biologia, UNAM	D	1991	Santiago Comaltepec	3	MCF
Chiroptera	Phyllostomidae	Sturnira	hondurensis	Sturnira hondurensis	B	Museo de Zoologia Alfonso L. Herrera, Facultad de Ciencias, UNAM	D	1987	San Pedro Yolox	3	MCF
Chiroptera	Phyllostomidae	Sturnira	hondurensis	Sturnira hondurensis	B	Museo de Zoologia Alfonso L. Herrera, Facultad de Ciencias, UNAM	D	1988	San Pedro Yolox	3	MCF
Chiroptera	Phyllostomidae	Sturnira	hondurensis	Sturnira hondurensis	B	Museo de Zoologia Alfonso L. Herrera, Facultad de Ciencias, UNAM	D	1982	Santiago Comaltepec	3	MCF
Chiroptera	Phyllostomidae	Sturnira	hondurensis	Sturnira hondurensis	B	Museo de Zoologia Alfonso L. Herrera, Facultad de Ciencias, UNAM	D	1987	Santiago Comaltepec	3	MCF
Chiroptera	Phyllostomidae	Sturnira	hondurensis	Sturnira hondurensis	B	Museo de Zoologia Alfonso L. Herrera, Facultad de Ciencias, UNAM	D	1987	Santiago Comaltepec	3	MCF
Chiroptera	Phyllostomidae	Sturnira	hondurensis	Sturnira hondurensis	B	Museo de Zoologia Alfonso L. Herrera, Facultad de Ciencias, UNAM	D	1988	Santiago Comaltepec	2	MCF
Chiroptera	Phyllostomidae	Sturnira	hondurensis	Sturnira hondurensis	B	Texas Tech University, Museum of Texas Tech University	D	1974	Santiago Comaltepec	2	MCF
Chiroptera	Phyllostomidae	Sturnira	hondurensis	Sturnira hondurensis	B	Texas Tech University, Museum of Texas Tech University	D	1974	Santiago Comaltepec	3	MCF
Chiroptera	Phyllostomidae	Sturnira	hondurensis	Sturnira hondurensis	B	Texas Tech University, Museum of Texas Tech University	D	1974	Santiago Comaltepec	3	MCF
Chiroptera	Phyllostomidae	Sturnira	hondurensis	Sturnira hondurensis	B	University of Kansas, Museum of Natural History	D	1964	Santiago Comaltepec	3	MCF
Chiroptera	Phyllostomidae	Artibeus	jamaicensis	Artibeus jamaicensis	B	University of Kansas, Museum of Natural History	D	1964	Santiago Comaltepec	3	P-OF
Chiroptera	Phyllostomidae	Artibeus	lituratus	Artibeus lituratus	B	Museo de Zoologia Alfonso L. Herrera, Facultad de Ciencias, UNAM	D	1987	Santiago Comaltepec	4	P-OF
Chiroptera	Phyllostomidae	Artibeus	lituratus	Artibeus lituratus	B	Texas A & M University, Texas Cooperative Wildlife Collection	D	1964	Santiago Comaltepec	3	P-OF
Chiroptera	Phyllostomidae	Artibeus	lituratus	Artibeus lituratus	B	University of Kansas, Museum of Natural History	D	1964	Santiago Comaltepec	3	P-OF
Chiroptera	Phyllostomidae	Carollia	sowelli	Carollia sowelli	B	Museo de Zoologia Alfonso L. Herrera, Facultad de Ciencias, UNAM	D	1987	Santiago Comaltepec	4	P-OF
Chiroptera	Phyllostomidae	Carollia	sowelli	Carollia sowelli	B	Museo de Zoologia Alfonso L. Herrera, Facultad de Ciencias, UNAM	D	1987	Santiago Comaltepec	4	P-OF
Chiroptera	Phyllostomidae	Centurio	senex	Centurio senex	B	University of Kansas, Museum of Natural History	D	1964	Santiago Comaltepec	3	P-OF
Chiroptera	Phyllostomidae	Dermanura	toltecus	Dermanura tolteca	B	Coleccion Nacional de Mamiferos, Instituto de Biologia, UNAM	D	1991	Santiago Comaltepec	4	P-OF
Chiroptera	Phyllostomidae	Dermanura	toltecus	Dermanura tolteca	B	Museo de Zoologia Alfonso L. Herrera, Facultad de Ciencias, UNAM	D	1987	Santiago Comaltepec	4	P-OF
Chiroptera	Phyllostomidae	Dermanura	toltecus	Dermanura tolteca	B	University of Kansas, Museum of Natural History	D	1964	Santiago Comaltepec	3	P-OF
Chiroptera	Phyllostomidae	Desmodus	rotundus	Desmodus rotundus	B	Museo de Zoologia Alfonso L. Herrera, Facultad de Ciencias, UNAM	D	1987	Santiago Comaltepec	4	P-OF
Chiroptera	Phyllostomidae	Desmodus	rotundus	Desmodus rotundus	B	Texas A & M University, Texas Cooperative Wildlife Collection	D	1982	Santiago Comaltepec	3	P-OF
Chiroptera	Phyllostomidae	Desmodus	rotundus	Desmodus rotundus	B	Texas A & M University, Texas Cooperative Wildlife Collection	D	9999	Santiago Comaltepec	3	P-OF
Chiroptera	Phyllostomidae	Glossophaga	soricina	Glossophaga soricina	B	University of Kansas, Museum of Natural History	D	1964	Santiago Comaltepec	3	P-OF
Chiroptera	Phyllostomidae	Hylonycteris	underwoodi	Hylonycteris underwoodi	B	University of Kansas, Museum of Natural History	D	1964	Santiago Comaltepec	3	P-OF
Chiroptera	Phyllostomidae	Leptonycteris	yerbabuenae	Leptonycteris yerbabuenae	B	University of Kansas, Museum of Natural History	D	1975	Santiago Comaltepec	4	P-OF
Chiroptera	Mormoopidae	Mormoops	megalophylla	Mormoops megalophylla	B	Museo de Zoologia Alfonso L. Herrera, Facultad de Ciencias, UNAM	D	1988	Santiago Comaltepec	3	P-OF
Chiroptera	Vespertilionidae	Myotis	keaysi	Myotis keaysi	B	University of Kansas, Museum of Natural History	D	1964	Santiago Comaltepec	3	P-OF
Chiroptera	Vespertilionidae	Myotis	keaysi	Myotis keaysi	B	Registro Bibliografico R Hall	D	1981	San Jose Chiltepec	3	P-OF
Chiroptera	Vespertilionidae	Myotis	nigricans	Myotis nigricans	B	Museo de Zoologia Alfonso L. Herrera, Facultad de Ciencias, UNAM	D	1987	Santiago Comaltepec	4	P-OF
Chiroptera	Vespertilionidae	Myotis	nigricans	Myotis nigricans	B	Museo de Zoologia Alfonso L. Herrera, Facultad de Ciencias, UNAM	D	1988	Santiago Comaltepec	4	P-OF
Chiroptera	Vespertilionidae	Myotis	ND	ND	B	University of California, Berkeley, Museum of Vertebrate Zoology	D	1977	Santiago Comaltepec	3	P-OF
Chiroptera	Vespertilionidae	Myotis	ND	ND	B	University of Michigan, Museum of Zoology	D	1977	Santiago Comaltepec	3	P-OF
Chiroptera	Phyllostomidae	Sturnira	hondurensis	Sturnira hondurensis	B	Coleccion Nacional de Mamiferos, Instituto de Biologia, UNAM	D	1964	Santiago Comaltepec	3	P-OF
Chiroptera	Phyllostomidae	Sturnira	hondurensis	Sturnira hondurensis	B	Coleccion Nacional de Mamiferos, Instituto de Biologia, UNAM	D	1991	Santiago Comaltepec	4	P-OF
Chiroptera	Phyllostomidae	Sturnira	hondurensis	Sturnira hondurensis	B	Museo de Zoologia Alfonso L. Herrera, Facultad de Ciencias, UNAM	D	1987	Santiago Comaltepec	4	P-OF
Chiroptera	Phyllostomidae	Sturnira	hondurensis	Sturnira hondurensis	B	Museo de Zoologia Alfonso L. Herrera, Facultad de Ciencias, UNAM	D	1987	Santiago Comaltepec	4	P-OF
Chiroptera	Phyllostomidae	Sturnira	hondurensis	Sturnira hondurensis	B	Museo de Zoologia Alfonso L. Herrera, Facultad de Ciencias, UNAM	D	1987	Santiago Comaltepec	4	P-OF
Chiroptera	Phyllostomidae	Sturnira	hondurensis	Sturnira hondurensis	B	Museo de Zoologia Alfonso L. Herrera, Facultad de Ciencias, UNAM	D	1988	Santiago Comaltepec	3	P-OF
Chiroptera	Phyllostomidae	Sturnira	hondurensis	Sturnira hondurensis	B	Museo de Zoologia Alfonso L. Herrera, Facultad de Ciencias, UNAM	D	1988	Santiago Comaltepec	4	P-OF
Chiroptera	Phyllostomidae	Sturnira	hondurensis	Sturnira hondurensis	B	Museo de Zoologia Alfonso L. Herrera, Facultad de Ciencias, UNAM	D	1988	Santiago Comaltepec	4	P-OF
Chiroptera	Phyllostomidae	Sturnira	hondurensis	Sturnira hondurensis	B	Texas Tech University, Museum of Texas Tech University	D	1974	San Pedro Yolox	3	P-OF
Chiroptera	Phyllostomidae	Sturnira	hondurensis	Sturnira hondurensis	B	University of Kansas, Museum of Natural History	D	1962	Santiago Comaltepec	3	P-OF
Chiroptera	Phyllostomidae	Sturnira	hondurensis	Sturnira hondurensis	B	University of Kansas, Museum of Natural History	D	1964	Santiago Comaltepec	3	P-OF
Chiroptera	Phyllostomidae	Sturnira	hondurensis	Sturnira hondurensis	B	University of Kansas, Museum of Natural History	D	1966	Santiago Comaltepec	3	P-OF
Chiroptera	Phyllostomidae	Sturnira	parvidens	Sturnira parvidens	B	Carnegie Museum of Natural History	D	1979	Santiago Comaltepec	3	P-OF
Chiroptera	Phyllostomidae	Sturnira	parvidens	Sturnira parvidens	B	Texas A & M University, Texas Cooperative Wildlife Collection	D	9999	Santiago Comaltepec	3	P-OF
Chiroptera	Molossidae	Tadarida	brasiliensis	Tadarida brasiliensis	B	Museo de Zoologia Alfonso L. Herrera, Facultad de Ciencias, UNAM	D	1988	San Pedro Yolox	4	P-OF
Chiroptera	Molossidae	Tadarida	brasiliensis	Tadarida brasiliensis	B	Museo de Zoologia Alfonso L. Herrera, Facultad de Ciencias, UNAM	D	1988	Santiago Comaltepec	4	P-OF
Chiroptera	Molossidae	Tadarida	brasiliensis	Tadarida brasiliensis	B	Museo de Zoologia Alfonso L. Herrera, Facultad de Ciencias, UNAM	D	1988	Santiago Comaltepec	4	P-OF
Chiroptera	Phyllostomidae	Anoura	geoffroyi	Anoura geoffroyi	B	University of Kansas, Museum of Natural History	D	1964	Santiago Comaltepec	3	TRF
Chiroptera	Phyllostomidae	Artibeus	jamaicensis	Artibeus jamaicensis	B	Museo de Zoologia Alfonso L. Herrera, Facultad de Ciencias, UNAM	D	1987	Santiago Comaltepec	3	TRF
Chiroptera	Phyllostomidae	Artibeus	jamaicensis	Artibeus jamaicensis	B	Natural History Museum of Los Angeles County	D	1960	Ayozintepec	1	TRF
Chiroptera	Phyllostomidae	Artibeus	lituratus	Artibeus lituratus	B	Museo de Zoologia Alfonso L. Herrera, Facultad de Ciencias, UNAM	D	1989	San Juan Bautista Valle Nacional	1	TRF
Chiroptera	Phyllostomidae	Artibeus	lituratus	Artibeus lituratus	B	Museo de Zoologia Alfonso L. Herrera, Facultad de Ciencias, UNAM	D	1988	Santiago Comaltepec	3	TRF
Chiroptera	Emballonuridae	Balantiopteryx	io	Balantiopteryx io	B	Museo de Zoologia Alfonso L. Herrera, Facultad de Ciencias, UNAM	D	1988	Santa Maria Jacatepec	1	TRF
Chiroptera	Emballonuridae	Balantiopteryx	io	Balantiopteryx io	B	Bulletin of The American Museum of Natural History	D	1969	San Jose Chiltepec	1	TRF
Chiroptera	Emballonuridae	Balantiopteryx	io	Balantiopteryx io	B	Registro Bibliografico R Hall	D	1981	San Lucas Ojitlan	1	TRF
Chiroptera	Phyllostomidae	Carollia	perspicillata	Carollia perspicillata	B	Coleccion Nacional de Mamiferos, Instituto de Biologia, UNAM	D	1979	San Lucas Ojitlan	1	TRF
Chiroptera	Phyllostomidae	Carollia	perspicillata	Carollia perspicillata	B	Escuela Nacional de Ciencias Biologicas	D	1963	San Juan Bautista Valle Nacional	2	TRF
Chiroptera	Phyllostomidae	Carollia	perspicillata	Carollia perspicillata	B	Museo de Zoologia Alfonso L. Herrera, Facultad de Ciencias, UNAM	D	1987	San Juan Bautista Valle Nacional	1	TRF
Chiroptera	Phyllostomidae	Carollia	perspicillata	Carollia perspicillata	B	Museo de Zoologia Alfonso L. Herrera, Facultad de Ciencias, UNAM	D	1987	San Juan Bautista Valle Nacional	1	TRF
Chiroptera	Phyllostomidae	Carollia	perspicillata	Carollia perspicillata	B	Museo de Zoologia Alfonso L. Herrera, Facultad de Ciencias, UNAM	D	1988	San Juan Bautista Valle Nacional	1	TRF
Chiroptera	Phyllostomidae	Carollia	perspicillata	Carollia perspicillata	B	Museo de Zoologia Alfonso L. Herrera, Facultad de Ciencias, UNAM	D	1987	Santiago Comaltepec	3	TRF
Chiroptera	Phyllostomidae	Carollia	perspicillata	Carollia perspicillata	B	Museo de Zoologia Alfonso L. Herrera, Facultad de Ciencias, UNAM	D	1988	Santiago Comaltepec	3	TRF
Chiroptera	Phyllostomidae	Carollia	perspicillata	Carollia perspicillata	B	Natural History Museum of Los Angeles County	D	1960	Ayozintepec	1	TRF
Chiroptera	Phyllostomidae	Carollia	perspicillata	Carollia perspicillata	B	Natural History Museum of Los Angeles County	D	1960	San Lucas Ojitlan	1	TRF
Chiroptera	Phyllostomidae	Carollia	perspicillata	Carollia perspicillata	B	Texas A & M University, Texas Cooperative Wildlife Collection	D	1979	San Juan Bautista Valle Nacional	1	TRF
Chiroptera	Phyllostomidae	Carollia	perspicillata	Carollia perspicillata	B	Bulletin of The American Museum of Natural History	D	1969	San Jose Chiltepec	1	TRF
Chiroptera	Phyllostomidae	Carollia	sowelli	Carollia sowelli	B	Museo de Zoologia Alfonso L. Herrera, Facultad de Ciencias, UNAM	D	1987	San Juan Bautista Valle Nacional	1	TRF
Chiroptera	Phyllostomidae	Carollia	sowelli	Carollia sowelli	B	Museo de Zoologia Alfonso L. Herrera, Facultad de Ciencias, UNAM	D	1987	San Juan Bautista Valle Nacional	1	TRF
Chiroptera	Phyllostomidae	Carollia	sowelli	Carollia sowelli	B	Museo de Zoologia Alfonso L. Herrera, Facultad de Ciencias, UNAM	D	1988	San Juan Bautista Valle Nacional	1	TRF
Chiroptera	Phyllostomidae	Carollia	sowelli	Carollia sowelli	B	Museo de Zoologia Alfonso L. Herrera, Facultad de Ciencias, UNAM	D	1988	San Juan Bautista Valle Nacional	1	TRF
Chiroptera	Phyllostomidae	Carollia	sowelli	Carollia sowelli	B	Museo de Zoologia Alfonso L. Herrera, Facultad de Ciencias, UNAM	D	1988	San Juan Bautista Valle Nacional	1	TRF
Chiroptera	Phyllostomidae	Carollia	sowelli	Carollia sowelli	B	Museo de Zoologia Alfonso L. Herrera, Facultad de Ciencias, UNAM	D	1987	Santiago Comaltepec	2	TRF
Chiroptera	Phyllostomidae	Carollia	sowelli	Carollia sowelli	B	Museo de Zoologia Alfonso L. Herrera, Facultad de Ciencias, UNAM	D	1987	Santiago Comaltepec	3	TRF
Chiroptera	Phyllostomidae	Carollia	sowelli	Carollia sowelli	B	Museo de Zoologia Alfonso L. Herrera, Facultad de Ciencias, UNAM	D	1988	Santiago Comaltepec	3	TRF
Chiroptera	Phyllostomidae	Carollia	sowelli	Carollia sowelli	B	Museo de Zoologia Alfonso L. Herrera, Facultad de Ciencias, UNAM	D	1989	Santiago Comaltepec	3	TRF
Chiroptera	Phyllostomidae	Carollia	sowelli	Carollia sowelli	B	Texas Tech University, Museum of Texas Tech University	D	1974	San Juan Bautista Valle Nacional	3	TRF
Chiroptera	Phyllostomidae	Carollia	sowelli	Carollia sowelli	B	University of Michigan, Museum of Zoology	D	1964	San Juan Bautista Valle Nacional	2	TRF
Chiroptera	Phyllostomidae	Carollia	sowelli	Carollia sowelli	B	Anales del Instituto de Biologia	D	2001	San Juan Lana	1	TRF
Chiroptera	Phyllostomidae	Carollia	subrufa	Carollia subrufa	B	Texas A & M University, Texas Cooperative Wildlife Collection	D	9999	San Lucas Ojitlan	1	TRF
Chiroptera	Phyllostomidae	Carollia	subrufa	Carollia subrufa	B	Bulletin of The American Museum of Natural History	D	1969	San Jose Chiltepec	1	TRF
Chiroptera	Phyllostomidae	Centurio	senex	Centurio senex	B	Natural History Museum of Los Angeles County	D	1960	San Lucas Ojitlan	1	TRF
Chiroptera	Phyllostomidae	Centurio	senex	Centurio senex	B	Bulletin of The American Museum of Natural History	D	1969	San Lucas Ojitlan	1	TRF
Chiroptera	Phyllostomidae	Chiroderma	villosum	Chiroderma villosum	B	Anales del Instituto de Biologia	D	2001	San Juan Lana	1	TRF
Chiroptera	Phyllostomidae	Chrotopterus	auritus	Chrotopterus auritus	B	Registro Bibliografico R Hall	D	1966	Santiago Comaltepec	2	TRF
Chiroptera	Phyllostomidae	Dermanura	phaeotis	Dermanura phaeotis	B	Coleccion Nacional de Mamiferos, Instituto de Biologia, UNAM	D	1980	San Juan Bautista Valle Nacional	1	TRF
Chiroptera	Phyllostomidae	Dermanura	phaeotis	Dermanura phaeotis	B	Museo de Zoologia Alfonso L. Herrera, Facultad de Ciencias, UNAM	D	1987	Santiago Comaltepec	3	TRF
Chiroptera	Phyllostomidae	Dermanura	phaeotis	Dermanura phaeotis	B	Texas A & M University, Texas Cooperative Wildlife Collection	D	9999	San Lucas Ojitlan	1	TRF
Chiroptera	Phyllostomidae	Dermanura	phaeotis	Dermanura phaeotis	B	Bulletin of The American Museum of Natural History	D	1969	San Jose Chiltepec	1	TRF
Chiroptera	Phyllostomidae	Dermanura	toltecus	Dermanura tolteca	B	Museo de Zoologia Alfonso L. Herrera, Facultad de Ciencias, UNAM	D	1987	San Juan Bautista Valle Nacional	1	TRF
Chiroptera	Phyllostomidae	Dermanura	toltecus	Dermanura tolteca	B	Museo de Zoologia Alfonso L. Herrera, Facultad de Ciencias, UNAM	D	1987	Santiago Comaltepec	2	TRF
Chiroptera	Phyllostomidae	Dermanura	toltecus	Dermanura tolteca	B	Museo de Zoologia Alfonso L. Herrera, Facultad de Ciencias, UNAM	D	1987	Santiago Comaltepec	3	TRF
Chiroptera	Phyllostomidae	Dermanura	toltecus	Dermanura tolteca	B	Museo de Zoologia Alfonso L. Herrera, Facultad de Ciencias, UNAM	D	1987	Santiago Comaltepec	3	TRF
Chiroptera	Phyllostomidae	Dermanura	toltecus	Dermanura tolteca	B	Museo de Zoologia Alfonso L. Herrera, Facultad de Ciencias, UNAM	D	1988	Santiago Comaltepec	3	TRF
Chiroptera	Phyllostomidae	Dermanura	toltecus	Dermanura tolteca	B	University of Michigan, Museum of Zoology	D	1964	San Juan Bautista Valle Nacional	2	TRF
Chiroptera	Phyllostomidae	Desmodus	rotundus	Desmodus rotundus	B	Coleccion Nacional de Mamiferos, Instituto de Biologia, UNAM	D	1980	San Juan Bautista Valle Nacional	1	TRF
Chiroptera	Phyllostomidae	Desmodus	rotundus	Desmodus rotundus	B	Coleccion Nacional de Mamiferos, Instituto de Biologia, UNAM	D	1969	Santa Maria Jacatepec	1	TRF
Chiroptera	Phyllostomidae	Desmodus	rotundus	Desmodus rotundus	B	Natural History Museum of Los Angeles County	D	1960	Ayozintepec	1	TRF
Chiroptera	Phyllostomidae	Desmodus	rotundus	Desmodus rotundus	B	Natural History Museum of Los Angeles County	D	1960	San Lucas Ojitlan	1	TRF
Chiroptera	Vespertilionidae	Eptesicus	furinalis	Eptesicus furinalis	B	Bulletin of The American Museum of Natural History	D	1969	San Jose Chiltepec	1	TRF
Chiroptera	Vespertilionidae	Eptesicus	furinalis	Eptesicus furinalis	B	Registro Bibliografico R Hall	D	1981	San Lucas Ojitlan	1	TRF
Chiroptera	Phyllostomidae	Glossophaga	commissarisi	Glossophaga commissarisi	B	Bulletin of The American Museum of Natural History	D	1969	San Jose Chiltepec	1	TRF
Chiroptera	Phyllostomidae	Glossophaga	commissarisi	Glossophaga commissarisi	B	Registro Bibliografico R Hall	D	1981	San Jose Chiltepec	2	TRF
Chiroptera	Phyllostomidae	Glossophaga	leachii	Glossophaga leachii	B	Museo de Zoologia Alfonso L. Herrera, Facultad de Ciencias, UNAM	D	1987	San Juan Bautista Valle Nacional	1	TRF
Chiroptera	Phyllostomidae	Glossophaga	leachii	Glossophaga leachii	B	Registro Bibliografico R Hall	D	1981	San Lucas Ojitlan	1	TRF
Chiroptera	Phyllostomidae	Glossophaga	soricina	Glossophaga soricina	B	Museo de Zoologia Alfonso L. Herrera, Facultad de Ciencias, UNAM	D	1987	San Juan Bautista Valle Nacional	1	TRF
Chiroptera	Phyllostomidae	Glossophaga	soricina	Glossophaga soricina	B	Museo de Zoologia Alfonso L. Herrera, Facultad de Ciencias, UNAM	D	1987	San Juan Bautista Valle Nacional	1	TRF
Chiroptera	Phyllostomidae	Glossophaga	soricina	Glossophaga soricina	B	Museo de Zoologia Alfonso L. Herrera, Facultad de Ciencias, UNAM	D	1987	San Juan Bautista Valle Nacional	1	TRF
Chiroptera	Phyllostomidae	Glossophaga	soricina	Glossophaga soricina	B	Museo de Zoologia Alfonso L. Herrera, Facultad de Ciencias, UNAM	D	1987	San Juan Bautista Valle Nacional	2	TRF
Chiroptera	Phyllostomidae	Glossophaga	soricina	Glossophaga soricina	B	Museo de Zoologia Alfonso L. Herrera, Facultad de Ciencias, UNAM	D	1988	San Juan Bautista Valle Nacional	1	TRF
Chiroptera	Phyllostomidae	Glossophaga	soricina	Glossophaga soricina	B	Museo de Zoologia Alfonso L. Herrera, Facultad de Ciencias, UNAM	D	1988	San Juan Bautista Valle Nacional	1	TRF
Chiroptera	Phyllostomidae	Glossophaga	soricina	Glossophaga soricina	B	Museo de Zoologia Alfonso L. Herrera, Facultad de Ciencias, UNAM	D	1988	San Juan Bautista Valle Nacional	1	TRF
Chiroptera	Phyllostomidae	Glossophaga	soricina	Glossophaga soricina	B	Museo de Zoologia Alfonso L. Herrera, Facultad de Ciencias, UNAM	D	1987	Santiago Comaltepec	3	TRF
Chiroptera	Phyllostomidae	Hylonycteris	underwoodi	Hylonycteris underwoodi	B	Bulletin of The American Museum of Natural History	D	1969	San Jose Chiltepec	1	TRF
Chiroptera	Vespertilionidae	Lasiurus	intermedius	Lasiurus intermedius	B	Bulletin of The American Museum of Natural History	D	1969	San Jose Chiltepec	1	TRF
Chiroptera	Molossidae	Molossus	aztecus	Molossus aztecus	B	Bulletin of The American Museum of Natural History	D	1969	San Jose Chiltepec	2	TRF
Chiroptera	Molossidae	Molossus	rufus	Molossus rufus	B	Natural History Museum of Los Angeles County	D	9999	San Juan Bautista Valle Nacional	2	TRF
Chiroptera	Molossidae	Molossus	rufus	Molossus rufus	B	Bulletin of The American Museum of Natural History	D	1969	San Jose Chiltepec	1	TRF
Chiroptera	Mormoopidae	Mormoops	megalophylla	Mormoops megalophylla	B	Bulletin of The American Museum of Natural History	D	1969	San Jose Chiltepec	1	TRF
Chiroptera	Vespertilionidae	Myotis	keaysi	Myotis keaysi	B	Bulletin of The American Museum of Natural History	D	1969	San Jose Chiltepec	1	TRF
Chiroptera	Vespertilionidae	Myotis	volans	Myotis volans	B	LACM Vertebrates	D	1960	San Juan Bautista Tuxtepec	1	TRF
Chiroptera	Vespertilionidae	Myotis	volans	Myotis volans	B	Síndrome de nariz blanca: Una zoonosis emergente que amenaza los quirópteros de México	D	2018	AYOTZINTEPEC	1	TRF
Chiroptera	Phyllostomidae	Carollia	ND	ND	B	Museo de Zoologia Alfonso L. Herrera, Facultad de Ciencias, UNAM	D	1987	Santiago Comaltepec	3	TRF
Chiroptera	Vespertilionidae	Perimyotis	subflavus	Perimyotis subflavus	B	MZFC_Actualización de la base de datos de la Colección de mamíferos del Museo de Zoología 'Alfonso L. Herrera'	D	1983	SAN JOSE CHILTEPEC	1	TRF
Chiroptera	Emballonuridae	Peropteryx	macrotis	Peropteryx macrotis	B	Museo de Zoologia Alfonso L. Herrera, Facultad de Ciencias, UNAM	D	1988	Santa Maria Jacatepec	1	TRF
Chiroptera	Emballonuridae	Peropteryx	macrotis	Peropteryx macrotis	B	Bulletin of The American Museum of Natural History	D	1969	San Jose Chiltepec	1	TRF
Chiroptera	Emballonuridae	Peropteryx	macrotis	Peropteryx macrotis	B	Registro Bibliografico R Hall	D	1981	San Lucas Ojitlan	1	TRF
Chiroptera	Phyllostomidae	Platyrrhinus	helleri	Platyrrhinus helleri	B	Museo de Zoologia Alfonso L. Herrera, Facultad de Ciencias, UNAM	D	1987	Santiago Comaltepec	3	TRF
Chiroptera	Phyllostomidae	Platyrrhinus	helleri	Platyrrhinus helleri	B	Bulletin of The American Museum of Natural History	D	1969	San Jose Chiltepec	1	TRF
Chiroptera	Mormoopidae	Pteronotus	parnellii	Pteronotus parnellii	B	Museo de Zoologia Alfonso L. Herrera, Facultad de Ciencias, UNAM	D	1987	San Juan Bautista Valle Nacional	1	TRF
Chiroptera	Mormoopidae	Pteronotus	parnellii	Pteronotus parnellii	B	Natural History Museum of Los Angeles County	D	1960	San Lucas Ojitlan	1	TRF
Chiroptera	Mormoopidae	Pteronotus	parnellii	Pteronotus parnellii	B	Natural History Museum of Los Angeles County	D	9999	San Lucas Ojitlan	1	TRF
Chiroptera	Mormoopidae	Pteronotus	parnellii	Pteronotus parnellii	B	Bulletin of The American Museum of Natural History	D	1969	San Jose Chiltepec	1	TRF
Chiroptera	Emballonuridae	Saccopteryx	bilineata	Saccopteryx bilineata	B	Bulletin of The American Museum of Natural History	D	1969	San Jose Chiltepec	1	TRF
Chiroptera	Phyllostomidae	Sturnira	hondurensis	Sturnira hondurensis	B	Coleccion Nacional de Mamiferos, Instituto de Biologia, UNAM	D	1964	San Juan Bautista Valle Nacional	2	TRF
Chiroptera	Phyllostomidae	Sturnira	hondurensis	Sturnira hondurensis	B	University of Michigan, Museum of Zoology	D	1964	San Juan Bautista Valle Nacional	2	TRF
Chiroptera	Phyllostomidae	Sturnira	parvidens	Sturnira parvidens	B	Museo de Zoologia Alfonso L. Herrera, Facultad de Ciencias, UNAM	D	1987	San Juan Bautista Valle Nacional	1	TRF
Chiroptera	Phyllostomidae	Sturnira	parvidens	Sturnira parvidens	B	Museo de Zoologia Alfonso L. Herrera, Facultad de Ciencias, UNAM	D	1987	San Juan Bautista Valle Nacional	1	TRF
Chiroptera	Phyllostomidae	Sturnira	parvidens	Sturnira parvidens	B	Museo de Zoologia Alfonso L. Herrera, Facultad de Ciencias, UNAM	D	1988	San Juan Bautista Valle Nacional	1	TRF
Chiroptera	Phyllostomidae	Sturnira	parvidens	Sturnira parvidens	B	Museo de Zoologia Alfonso L. Herrera, Facultad de Ciencias, UNAM	D	1988	San Juan Bautista Valle Nacional	1	TRF
Chiroptera	Phyllostomidae	Sturnira	parvidens	Sturnira parvidens	B	Museo de Zoologia Alfonso L. Herrera, Facultad de Ciencias, UNAM	D	1987	Santiago Comaltepec	3	TRF
Chiroptera	Phyllostomidae	Sturnira	parvidens	Sturnira parvidens	B	Museo de Zoologia Alfonso L. Herrera, Facultad de Ciencias, UNAM	D	1988	Santiago Comaltepec	2	TRF
Chiroptera	Phyllostomidae	Sturnira	parvidens	Sturnira parvidens	B	Museo de Zoologia Alfonso L. Herrera, Facultad de Ciencias, UNAM	D	1988	Santiago Comaltepec	3	TRF
Chiroptera	Phyllostomidae	Sturnira	parvidens	Sturnira parvidens	B	Natural History Museum of Los Angeles County	D	1960	San Lucas Ojitlan	1	TRF
Chiroptera	Phyllostomidae	Sturnira	parvidens	Sturnira parvidens	B	Natural History Museum of Los Angeles County	D	9999	San Lucas Ojitlan	1	TRF
Chiroptera	Phyllostomidae	Sturnira	parvidens	Sturnira parvidens	B	Texas A & M University, Texas Cooperative Wildlife Collection	D	9999	San Lucas Ojitlan	1	TRF
Chiroptera	Phyllostomidae	Trachops	cirrhosus	Trachops cirrhosus	B	Museo de Zoologia Alfonso L. Herrera, Facultad de Ciencias, UNAM	D	1989	Santiago Comaltepec	2	TRF
Chiroptera	Phyllostomidae	Vampyrodes	major	Vampyrodes major	B	Louisiana State University, Museum of Natural Science	D	1961	San Juan Bautista Valle Nacional	1	TRF
Chiroptera	Phyllostomidae	Vampyrodes	major	Vampyrodes major	B	Registro Bibliografico R Hall	D	1966	San Juan Bautista Valle Nacional	3	TRF
Chiroptera	Phyllostomidae	Vampyrodes	major	Vampyrodes major	B	Registro Bibliografico R Hall	D	1981	San Juan Bautista Valle Nacional	1	TRF
Chiroptera	Phyllostomidae	Vampyrum	spectrum	Vampyrum spectrum	B	Bat Research News	D	2005	Santiago Jocotepec	1	TRF
Chiroptera	Phyllostomidae	Artibeus	jamaicensis	Artibeus jamaicensis	B	American Museum of Natural History	D	1962	San Jose Chiltepec	1	SDTF
Chiroptera	Phyllostomidae	Artibeus	jamaicensis	Artibeus jamaicensis	B	Museo de Zoologia Alfonso L. Herrera, Facultad de Ciencias, UNAM	D	1988	San Jose Chiltepec	1	SDTF
Chiroptera	Phyllostomidae	Artibeus	jamaicensis	Artibeus jamaicensis	B	Bulletin of The American Museum of Natural History	D	1969	San Jose Chiltepec	1	SDTF
Chiroptera	Phyllostomidae	Artibeus	jamaicensis	Artibeus jamaicensis	B	Bulletin of The American Museum of Natural History	D	1969	San Jose Chiltepec	1	SDTF
Chiroptera	Phyllostomidae	Artibeus	lituratus	Artibeus lituratus	B	American Museum of Natural History	D	1962	San Jose Chiltepec	1	SDTF
Chiroptera	Phyllostomidae	Artibeus	lituratus	Artibeus lituratus	B	Coleccion Nacional de Mamiferos, Instituto de Biologia, UNAM	D	1968	San Jose Chiltepec	1	SDTF
Chiroptera	Phyllostomidae	Artibeus	lituratus	Artibeus lituratus	B	Museo de Zoologia Alfonso L. Herrera, Facultad de Ciencias, UNAM	D	1988	San Jose Chiltepec	1	SDTF
Chiroptera	Emballonuridae	Balantiopteryx	io	Balantiopteryx io	B	American Museum of Natural History	D	1962	San Jose Chiltepec	1	SDTF
Chiroptera	Emballonuridae	Balantiopteryx	io	Balantiopteryx io	B	Museo de Zoologia Alfonso L. Herrera, Facultad de Ciencias, UNAM	D	1988	San Jose Chiltepec	1	SDTF
Chiroptera	Emballonuridae	Balantiopteryx	io	Balantiopteryx io	B	Bulletin of The American Museum of Natural History	D	1969	San Jose Chiltepec	1	SDTF
Chiroptera	Emballonuridae	Balantiopteryx	plicata	Balantiopteryx plicata	B	American Museum of Natural History	D	1962	San Jose Chiltepec	1	SDTF
Chiroptera	Emballonuridae	Balantiopteryx	plicata	Balantiopteryx plicata	B	Bulletin of The American Museum of Natural History	D	1969	San Jose Chiltepec	1	SDTF
Chiroptera	Emballonuridae	Balantiopteryx	plicata	Balantiopteryx plicata	B	Bulletin of The American Museum of Natural History	D	1969	San Jose Chiltepec	1	SDTF
Chiroptera	Phyllostomidae	Carollia	perspicillata	Carollia perspicillata	B	American Museum of Natural History	D	1962	San Jose Chiltepec	1	SDTF
Chiroptera	Phyllostomidae	Carollia	perspicillata	Carollia perspicillata	B	Museo de Zoologia Alfonso L. Herrera, Facultad de Ciencias, UNAM	D	1988	San Jose Chiltepec	1	SDTF
Chiroptera	Phyllostomidae	Carollia	perspicillata	Carollia perspicillata	B	Texas Tech University, Museum of Texas Tech University	D	1974	San Juan Bautista Valle Nacional	1	SDTF
Chiroptera	Phyllostomidae	Carollia	perspicillata	Carollia perspicillata	B	Bulletin of The American Museum of Natural History	D	1969	San Jose Chiltepec	1	SDTF
Chiroptera	Phyllostomidae	Carollia	sowelli	Carollia sowelli	B	American Museum of Natural History	D	1962	San Jose Chiltepec	1	SDTF
Chiroptera	Phyllostomidae	Carollia	sowelli	Carollia sowelli	B	Museo de Zoologia Alfonso L. Herrera, Facultad de Ciencias, UNAM	D	1988	San Jose Chiltepec	1	SDTF
Chiroptera	Phyllostomidae	Carollia	sowelli	Carollia sowelli	B	Texas Tech University, Museum of Texas Tech University	D	1974	San Juan Bautista Valle Nacional	1	SDTF
Chiroptera	Phyllostomidae	Carollia	subrufa	Carollia subrufa	B	Bulletin of The American Museum of Natural History	D	1969	San Jose Chiltepec	1	SDTF
Chiroptera	Phyllostomidae	Centurio	senex	Centurio senex	B	Museo de Zoologia Alfonso L. Herrera, Facultad de Ciencias, UNAM	D	1988	San Jose Chiltepec	1	SDTF
Chiroptera	Phyllostomidae	Dermanura	phaeotis	Dermanura phaeotis	B	American Museum of Natural History	D	1962	San Jose Chiltepec	1	SDTF
Chiroptera	Phyllostomidae	Dermanura	phaeotis	Dermanura phaeotis	B	Museo de Zoologia Alfonso L. Herrera, Facultad de Ciencias, UNAM	D	1988	San Jose Chiltepec	1	SDTF
Chiroptera	Phyllostomidae	Dermanura	phaeotis	Dermanura phaeotis	B	Bulletin of The American Museum of Natural History	D	1969	San Jose Chiltepec	1	SDTF
Chiroptera	Phyllostomidae	Dermanura	toltecus	Dermanura tolteca	B	Texas Tech University, Museum of Texas Tech University	D	1974	San Juan Bautista Valle Nacional	1	SDTF
Chiroptera	Phyllostomidae	Desmodus	rotundus	Desmodus rotundus	B	American Museum of Natural History	D	1962	San Jose Chiltepec	1	SDTF
Chiroptera	Phyllostomidae	Desmodus	rotundus	Desmodus rotundus	B	Coleccion Nacional de Mamiferos, Instituto de Biologia, UNAM	D	1968	San Jose Chiltepec	1	SDTF
Chiroptera	Phyllostomidae	Desmodus	rotundus	Desmodus rotundus	B	Museo de Zoologia Alfonso L. Herrera, Facultad de Ciencias, UNAM	D	1988	San Jose Chiltepec	1	SDTF
Chiroptera	Phyllostomidae	Desmodus	rotundus	Desmodus rotundus	B	Museo de Zoologia Alfonso L. Herrera, Facultad de Ciencias, UNAM	D	1988	San Jose Chiltepec	1	SDTF
Chiroptera	Phyllostomidae	Desmodus	rotundus	Desmodus rotundus	B	Bulletin of The American Museum of Natural History	D	1969	San Jose Chiltepec	1	SDTF
Chiroptera	Phyllostomidae	Desmodus	rotundus	Desmodus rotundus	B	Bulletin of The American Museum of Natural History	D	1969	San Jose Chiltepec	1	SDTF
Chiroptera	Vespertilionidae	Eptesicus	furinalis	Eptesicus furinalis	B	American Museum of Natural History	D	1962	San Jose Chiltepec	1	SDTF
Chiroptera	Vespertilionidae	Eptesicus	furinalis	Eptesicus furinalis	B	Bulletin of The American Museum of Natural History	D	1969	San Jose Chiltepec	1	SDTF
Chiroptera	Phyllostomidae	Glossophaga	commissarisi	Glossophaga commissarisi	B	American Museum of Natural History	D	1962	San Jose Chiltepec	2	SDTF
Chiroptera	Phyllostomidae	Glossophaga	commissarisi	Glossophaga commissarisi	B	Bulletin of The American Museum of Natural History	D	1969	San Jose Chiltepec	2	SDTF
Chiroptera	Phyllostomidae	Glossophaga	leachii	Glossophaga leachii	B	Bulletin of The American Museum of Natural History	D	1969	San Jose Chiltepec	1	SDTF
Chiroptera	Phyllostomidae	Glossophaga	soricina	Glossophaga soricina	B	American Museum of Natural History	D	1962	San Jose Chiltepec	1	SDTF
Chiroptera	Phyllostomidae	Glossophaga	soricina	Glossophaga soricina	B	Museo de Zoologia Alfonso L. Herrera, Facultad de Ciencias, UNAM	D	1988	San Jose Chiltepec	1	SDTF
Chiroptera	Phyllostomidae	Glossophaga	soricina	Glossophaga soricina	B	Texas Tech University, Museum of Texas Tech University	D	1974	San Juan Bautista Valle Nacional	1	SDTF
Chiroptera	Phyllostomidae	Glossophaga	soricina	Glossophaga soricina	B	Bulletin of The American Museum of Natural History	D	1969	San Jose Chiltepec	1	SDTF
Chiroptera	Phyllostomidae	Hylonycteris	underwoodi	Hylonycteris underwoodi	B	American Museum of Natural History	D	1962	San Jose Chiltepec	1	SDTF
Chiroptera	Phyllostomidae	Hylonycteris	underwoodi	Hylonycteris underwoodi	B	Bulletin of The American Museum of Natural History	D	1969	San Jose Chiltepec	1	SDTF
Chiroptera	Vespertilionidae	Lasiurus	intermedius	Lasiurus intermedius	B	American Museum of Natural History	D	1962	San Jose Chiltepec	1	SDTF
Chiroptera	Vespertilionidae	Lasiurus	intermedius	Lasiurus intermedius	B	Bulletin of The American Museum of Natural History	D	1969	San Jose Chiltepec	1	SDTF
Chiroptera	Vespertilionidae	Lasiurus	xanthinus	Lasiurus xanthinus	B	American Museum of Natural History	D	1962	San Jose Chiltepec	1	SDTF
Chiroptera	Phyllostomidae	Leptonycteris	yerbabuenae	Leptonycteris yerbabuenae	B	American Museum of Natural History	D	1962	San Jose Chiltepec	1	SDTF
Chiroptera	Phyllostomidae	Micronycteris	microtis	Micronycteris microtis	B	American Museum of Natural History	D	1962	San Jose Chiltepec	1	SDTF
Chiroptera	Phyllostomidae	Micronycteris	microtis	Micronycteris microtis	B	Coleccion Nacional de Mamiferos, Instituto de Biologia, UNAM	D	1968	San Jose Chiltepec	1	SDTF
Chiroptera	Phyllostomidae	Micronycteris	microtis	Micronycteris microtis	B	Bulletin of The American Museum of Natural History	D	1969	San Jose Chiltepec	1	SDTF
Chiroptera	Phyllostomidae	Micronycteris	microtis	Micronycteris microtis	B	Bulletin of The American Museum of Natural History	D	1969	San Jose Chiltepec	1	SDTF
Chiroptera	Molossidae	Molossus	aztecus	Molossus aztecus	B	American Museum of Natural History	D	1962	San Jose Chiltepec	2	SDTF
Chiroptera	Molossidae	Molossus	aztecus	Molossus aztecus	B	Bulletin of The American Museum of Natural History	D	1969	San Jose Chiltepec	2	SDTF
Chiroptera	Molossidae	Molossus	rufus	Molossus rufus	B	American Museum of Natural History	D	1962	San Jose Chiltepec	1	SDTF
Chiroptera	Molossidae	Molossus	rufus	Molossus rufus	B	Bulletin of The American Museum of Natural History	D	1969	San Jose Chiltepec	1	SDTF
Chiroptera	Mormoopidae	Mormoops	megalophylla	Mormoops megalophylla	B	American Museum of Natural History	D	1962	San Jose Chiltepec	1	SDTF
Chiroptera	Mormoopidae	Mormoops	megalophylla	Mormoops megalophylla	B	Texas Tech University, Museum of Texas Tech University	D	1974	San Juan Bautista Valle Nacional	1	SDTF
Chiroptera	Mormoopidae	Mormoops	megalophylla	Mormoops megalophylla	B	Bulletin of The American Museum of Natural History	D	1969	San Jose Chiltepec	1	SDTF
Chiroptera	Vespertilionidae	Myotis	keaysi	Myotis keaysi	B	American Museum of Natural History	D	1962	San Jose Chiltepec	1	SDTF
Chiroptera	Vespertilionidae	Myotis	nigricans	Myotis nigricans	B	Bulletin of The American Museum of Natural History	D	1969	San Jose Chiltepec	1	SDTF
Chiroptera	Emballonuridae	Peropteryx	macrotis	Peropteryx macrotis	B	American Museum of Natural History	D	1962	San Jose Chiltepec	1	SDTF
Chiroptera	Emballonuridae	Peropteryx	macrotis	Peropteryx macrotis	B	Coleccion Nacional de Mamiferos, Instituto de Biologia, UNAM	D	1968	San Jose Chiltepec	1	SDTF
Chiroptera	Emballonuridae	Peropteryx	macrotis	Peropteryx macrotis	B	Bulletin of The American Museum of Natural History	D	1969	San Jose Chiltepec	1	SDTF
Chiroptera	Phyllostomidae	Phyllostomus	discolor	Phyllostomus discolor	B	Texas Tech University, Museum of Texas Tech University	D	1974	San Juan Bautista Valle Nacional	1	SDTF
Chiroptera	Phyllostomidae	Platyrrhinus	helleri	Platyrrhinus helleri	B	American Museum of Natural History	D	1962	San Jose Chiltepec	1	SDTF
Chiroptera	Phyllostomidae	Platyrrhinus	helleri	Platyrrhinus helleri	B	Museo de Zoologia Alfonso L. Herrera, Facultad de Ciencias, UNAM	D	1988	San Jose Chiltepec	1	SDTF
Chiroptera	Phyllostomidae	Platyrrhinus	helleri	Platyrrhinus helleri	B	Bulletin of The American Museum of Natural History	D	1969	San Jose Chiltepec	1	SDTF
Chiroptera	Mormoopidae	Pteronotus	davyi	Pteronotus davyi	B	Museo de Zoologia Alfonso L. Herrera, Facultad de Ciencias, UNAM	D	1988	San Jose Chiltepec	1	SDTF
Chiroptera	Mormoopidae	Pteronotus	parnellii	Pteronotus parnellii	B	American Museum of Natural History	D	1962	San Jose Chiltepec	1	SDTF
Chiroptera	Mormoopidae	Pteronotus	personatus	Pteronotus personatus	B	Bulletin of The American Museum of Natural History	D	1969	San Jose Chiltepec	1	SDTF
Chiroptera	Emballonuridae	Rhynchonycteris	naso	Rhynchonycteris naso	B	MZFC_Actualización de la base de datos de la Colección de mamíferos del Museo de Zoología 'Alfonso L. Herrera'	D	1990	SAN JOSE CHILTEPEC	1	SDTF
Chiroptera	Emballonuridae	Rhynchonycteris	naso	Rhynchonycteris naso	B	MZFC_Actualización de la base de datos de la Colección de mamíferos del Museo de Zoología 'Alfonso L. Herrera'	D	1990	SAN JOSE CHILTEPEC	1	SDTF
Chiroptera	Emballonuridae	Saccopteryx	bilineata	Saccopteryx bilineata	B	American Museum of Natural History	D	1962	San Jose Chiltepec	1	SDTF
Chiroptera	Emballonuridae	Saccopteryx	bilineata	Saccopteryx bilineata	B	Bulletin of The American Museum of Natural History	D	1969	San Jose Chiltepec	1	SDTF
Chiroptera	Phyllostomidae	Sturnira	parvidens	Sturnira parvidens	B	American Museum of Natural History	D	1962	San Jose Chiltepec	1	SDTF
Chiroptera	Phyllostomidae	Sturnira	parvidens	Sturnira parvidens	B	Museo de Zoologia Alfonso L. Herrera, Facultad de Ciencias, UNAM	D	1988	San Jose Chiltepec	1	SDTF
Chiroptera	Phyllostomidae	Sturnira	parvidens	Sturnira parvidens	B	Museo de Zoologia Alfonso L. Herrera, Facultad de Ciencias, UNAM	D	1988	San Jose Chiltepec	1	SDTF
Chiroptera	Phyllostomidae	Sturnira	parvidens	Sturnira parvidens	B	Texas Tech University, Museum of Texas Tech University	D	1974	San Juan Bautista Valle Nacional	1	SDTF
Chiroptera	Phyllostomidae	Sturnira	parvidens	Sturnira parvidens	B	Bulletin of The American Museum of Natural History	D	1969	San Jose Chiltepec	1	SDTF
Chiroptera	Phyllostomidae	Sturnira	parvidens	Sturnira parvidens	B	Bulletin of The American Museum of Natural History	D	1969	San Jose Chiltepec	1	SDTF
Chiroptera	Phyllostomidae	Uroderma	bilobatum	Uroderma bilobatum	B	Museo de Zoologia Alfonso L. Herrera, Facultad de Ciencias, UNAM	D	1988	San Jose Chiltepec	1	SDTF
Chiroptera	Phyllostomidae	Carollia	sowelli	Carollia sowelli	B	Texas Tech University, Museum of Texas Tech University	D	1974	San Juan Bautista Valle Nacional	1	ND
Chiroptera	Molossidae	Molossus	rufus	Molossus rufus	B	Natural History Museum of Los Angeles County	D	1960	San Juan Bautista Valle Nacional	1	ND
Chiroptera	Phyllostomidae	Sturnira	hondurensis	Sturnira hondurensis	B	Museo de Zoologia Alfonso L. Herrera, Facultad de Ciencias, UNAM	D	1987	Santiago Comaltepec	3	ND
Chiroptera	Phyllostomidae	Sturnira	hondurensis	Sturnira hondurensis	B	Museo de Zoologia Alfonso L. Herrera, Facultad de Ciencias, UNAM	D	1987	Santiago Comaltepec	3	ND
Carnivora	Procyonidae	Bassariscus	astutus	Basariscus astutus	M-L	UNSIJ	C	2015	Santiago Comaltepec	4	MCF
Carnivora	Canidae	Canis	latrans	Canis latrans	M-L	UNSIJ	C	2015	Santiago Comaltepec	4	MCF
Carnivora	Canidae	Canis	latrans	Canis latrans	M-L	UNSIJ	C	2015	Santiago Comaltepec	4	MCF
Carnivora	Canidae	Canis	latrans	Canis latrans	M-L	UNSIJ	C	2015	Santiago Comaltepec	4	MCF
Carnivora	Canidae	Canis	latrans	Canis latrans	M-L	UNSIJ	C	2015	Santiago Comaltepec	4	MCF
Carnivora	Canidae	Canis	latrans	Canis latrans	M-L	UNSIJ	C	2015	Santiago Comaltepec	4	MCF
Carnivora	Canidae	Canis	latrans	Canis latrans	M-L	UNSIJ	C	2015	Santiago Comaltepec	4	MCF
Rodentia	Cuniculidae	Cuniculus	paca	Cuniculus paca	M-L	Fotocolecta	C	2015	San Pedro Yolox	2	MCF
Rodentia	Cuniculidae	Cuniculus	paca	Cuniculus paca	M-L	Fotocolecta	C	2015	San Pedro Yolox	2	MCF
Rodentia	Cuniculidae	Cuniculus	paca	Cuniculus paca	M-L	Fotocolecta	C	2015	San Pedro Yolox	2	MCF
Rodentia	Cuniculidae	Cuniculus	paca	Cuniculus paca	M-L	Fotocolecta	C	2015	San Pedro Yolox	2	MCF
Rodentia	Cuniculidae	Cuniculus	paca	Cuniculus paca	M-L	Fotocolecta	C	2015	San Pedro Yolox	2	MCF
Rodentia	Cuniculidae	Cuniculus	paca	Cuniculus paca	M-L	Fotocolecta	C	2015	San Pedro Yolox	2	MCF
Rodentia	Cuniculidae	Cuniculus	paca	Cuniculus paca	M-L	Fotocolecta	C	2015	San Pedro Yolox	2	MCF
Rodentia	Cuniculidae	Cuniculus	paca	Cuniculus paca	M-L	Fotocolecta	C	2015	San Pedro Yolox	2	MCF
Rodentia	Cuniculidae	Cuniculus	paca	Cuniculus paca	M-L	Fotocolecta	C	2015	San Pedro Yolox	2	MCF
Rodentia	Cuniculidae	Cuniculus	paca	Cuniculus paca	M-L	Fotocolecta	C	2015	San Pedro Yolox	2	MCF
Rodentia	Cuniculidae	Cuniculus	paca	Cuniculus paca	M-L	Fotocolecta	C	2015	San Pedro Yolox	2	MCF
Rodentia	Cuniculidae	Cuniculus	paca	Cuniculus paca	M-L	Fotocolecta	C	2015	San Pedro Yolox	2	MCF
Rodentia	Cuniculidae	Cuniculus	paca	Cuniculus paca	M-L	Fotocolecta	C	2015	San Pedro Yolox	2	MCF
Rodentia	Cuniculidae	Cuniculus	paca	Cuniculus paca	M-L	Fotocolecta	C	2015	San Pedro Yolox	2	MCF
Rodentia	Cuniculidae	Cuniculus	paca	Cuniculus paca	M-L	Fotocolecta	C	2015	San Pedro Yolox	2	MCF
Rodentia	Cuniculidae	Cuniculus	paca	Cuniculus paca	M-L	Fotocolecta	C	2015	San Pedro Yolox	2	MCF
Rodentia	Cuniculidae	Cuniculus	paca	Cuniculus paca	M-L	Fotocolecta	C	2015	San Pedro Yolox	2	MCF
Rodentia	Cuniculidae	Cuniculus	paca	Cuniculus paca	M-L	Fotocolecta	C	2015	San Pedro Yolox	2	MCF
Rodentia	Cuniculidae	Cuniculus	paca	Cuniculus paca	M-L	Fotocolecta	C	2015	San Pedro Yolox	2	MCF
Rodentia	Cuniculidae	Cuniculus	paca	Cuniculus paca	M-L	Fotocolecta	C	2015	San Pedro Yolox	2	MCF
Rodentia	Cuniculidae	Cuniculus	paca	Cuniculus paca	M-L	Fotocolecta	C	2015	San Pedro Yolox	2	MCF
Rodentia	Cuniculidae	Cuniculus	paca	Cuniculus paca	M-L	Fotocolecta	C	2015	San Pedro Yolox	2	MCF
Rodentia	Cuniculidae	Cuniculus	paca	Cuniculus paca	M-L	Fotocolecta	C	2015	San Pedro Yolox	2	MCF
Rodentia	Cuniculidae	Cuniculus	paca	Cuniculus paca	M-L	Fotocolecta	C	2015	San Pedro Yolox	2	MCF
Rodentia	Cuniculidae	Cuniculus	paca	Cuniculus paca	M-L	Fotocolecta	C	2015	San Pedro Yolox	2	MCF
Rodentia	Cuniculidae	Cuniculus	paca	Cuniculus paca	M-L	Fotocolecta	C	2015	San Pedro Yolox	2	MCF
Rodentia	Cuniculidae	Cuniculus	paca	Cuniculus paca	M-L	Fotocolecta	C	2015	San Pedro Yolox	2	MCF
Rodentia	Cuniculidae	Cuniculus	paca	Cuniculus paca	M-L	Fotocolecta	C	2015	San Pedro Yolox	2	MCF
Rodentia	Cuniculidae	Cuniculus	paca	Cuniculus paca	M-L	Fotocolecta	C	2015	San Pedro Yolox	2	MCF
Rodentia	Cuniculidae	Cuniculus	paca	Cuniculus paca	M-L	Fotocolecta	C	2015	San Pedro Yolox	2	MCF
Rodentia	Cuniculidae	Cuniculus	paca	Cuniculus paca	M-L	Fotocolecta	C	2015	San Pedro Yolox	2	MCF
Rodentia	Cuniculidae	Cuniculus	paca	Cuniculus paca	M-L	Fotocolecta	C	2015	San Pedro Yolox	2	MCF
Rodentia	Cuniculidae	Cuniculus	paca	Cuniculus paca	M-L	Fotocolecta	C	2015	San Pedro Yolox	2	MCF
Rodentia	Cuniculidae	Cuniculus	paca	Cuniculus paca	M-L	Fotocolecta	C	2015	San Pedro Yolox	2	MCF
Rodentia	Cuniculidae	Cuniculus	paca	Cuniculus paca	M-L	Fotocolecta	C	2015	San Pedro Yolox	3	MCF
Rodentia	Cuniculidae	Cuniculus	paca	Cuniculus paca	M-L	Fotocolecta	C	2015	San Pedro Yolox	3	MCF
Rodentia	Cuniculidae	Cuniculus	paca	Cuniculus paca	M-L	Fotocolecta	C	2015	San Pedro Yolox	3	MCF
Rodentia	Cuniculidae	Cuniculus	paca	Cuniculus paca	M-L	Fotocolecta	C	2015	San Pedro Yolox	3	MCF
Rodentia	Cuniculidae	Cuniculus	paca	Cuniculus paca	M-L	Fotocolecta	C	2015	San Pedro Yólox	2	MCF
Rodentia	Cuniculidae	Cuniculus	paca	Cuniculus paca	M-L	Fotocolecta	C	2015	San Pedro Yólox	2	MCF
Rodentia	Dasyproctidae	Dasyprocta	mexicana	Dasyprocta mexicana	M-L	Fotocolecta	C	2015	San Pedro Yolox	2	MCF
Rodentia	Dasyproctidae	Dasyprocta	mexicana	Dasyprocta mexicana	M-L	Fotocolecta	C	2015	San Pedro Yolox	2	MCF
Rodentia	Dasyproctidae	Dasyprocta	mexicana	Dasyprocta mexicana	M-L	Fotocolecta	C	2015	San Pedro Yolox	2	MCF
Rodentia	Dasyproctidae	Dasyprocta	mexicana	Dasyprocta mexicana	M-L	Fotocolecta	C	2015	San Pedro Yolox	2	MCF
Rodentia	Dasyproctidae	Dasyprocta	mexicana	Dasyprocta mexicana	M-L	Fotocolecta	C	2015	San Pedro Yolox	2	MCF
Rodentia	Dasyproctidae	Dasyprocta	mexicana	Dasyprocta mexicana	M-L	Fotocolecta	C	2015	San Pedro Yolox	2	MCF
Rodentia	Dasyproctidae	Dasyprocta	mexicana	Dasyprocta mexicana	M-L	Fotocolecta	C	2015	San Pedro Yolox	2	MCF
Rodentia	Dasyproctidae	Dasyprocta	mexicana	Dasyprocta mexicana	M-L	Fotocolecta	C	2015	San Pedro Yolox	2	MCF
Rodentia	Dasyproctidae	Dasyprocta	mexicana	Dasyprocta mexicana	M-L	Fotocolecta	C	2015	San Pedro Yolox	2	MCF
Rodentia	Dasyproctidae	Dasyprocta	mexicana	Dasyprocta mexicana	M-L	Fotocolecta	C	2015	San Pedro Yolox	2	MCF
Rodentia	Dasyproctidae	Dasyprocta	mexicana	Dasyprocta mexicana	M-L	Fotocolecta	C	2015	San Pedro Yolox	2	MCF
Rodentia	Dasyproctidae	Dasyprocta	mexicana	Dasyprocta mexicana	M-L	Fotocolecta	C	2015	San Pedro Yolox	2	MCF
Rodentia	Dasyproctidae	Dasyprocta	mexicana	Dasyprocta mexicana	M-L	Fotocolecta	C	2015	San Pedro Yolox	2	MCF
Rodentia	Dasyproctidae	Dasyprocta	mexicana	Dasyprocta mexicana	M-L	Fotocolecta	C	2015	San Pedro Yolox	2	MCF
Rodentia	Dasyproctidae	Dasyprocta	mexicana	Dasyprocta mexicana	M-L	Fotocolecta	C	2015	San Pedro Yolox	2	MCF
Rodentia	Dasyproctidae	Dasyprocta	mexicana	Dasyprocta mexicana	M-L	Fotocolecta	C	2015	San Pedro Yolox	2	MCF
Rodentia	Dasyproctidae	Dasyprocta	mexicana	Dasyprocta mexicana	M-L	Fotocolecta	C	2015	San Pedro Yolox	2	MCF
Rodentia	Dasyproctidae	Dasyprocta	mexicana	Dasyprocta mexicana	M-L	Fotocolecta	C	2015	San Pedro Yolox	2	MCF
Rodentia	Dasyproctidae	Dasyprocta	mexicana	Dasyprocta mexicana	M-L	Fotocolecta	C	2015	San Pedro Yolox	2	MCF
Rodentia	Dasyproctidae	Dasyprocta	mexicana	Dasyprocta mexicana	M-L	Fotocolecta	C	2015	San Pedro Yolox	2	MCF
Rodentia	Dasyproctidae	Dasyprocta	mexicana	Dasyprocta mexicana	M-L	Fotocolecta	C	2015	San Pedro Yolox	2	MCF
Rodentia	Dasyproctidae	Dasyprocta	mexicana	Dasyprocta mexicana	M-L	Fotocolecta	C	2015	San Pedro Yolox	2	MCF
Rodentia	Dasyproctidae	Dasyprocta	mexicana	Dasyprocta mexicana	M-L	Fotocolecta	C	2015	San Pedro Yolox	2	MCF
Rodentia	Dasyproctidae	Dasyprocta	mexicana	Dasyprocta mexicana	M-L	Fotocolecta	C	2015	San Pedro Yolox	2	MCF
Rodentia	Dasyproctidae	Dasyprocta	mexicana	Dasyprocta mexicana	M-L	Fotocolecta	C	2015	San Pedro Yolox	2	MCF
Rodentia	Dasyproctidae	Dasyprocta	mexicana	Dasyprocta mexicana	M-L	Fotocolecta	C	2015	San Pedro Yolox	2	MCF
Rodentia	Dasyproctidae	Dasyprocta	mexicana	Dasyprocta mexicana	M-L	Fotocolecta	C	2015	San Pedro Yolox	2	MCF
Rodentia	Dasyproctidae	Dasyprocta	mexicana	Dasyprocta mexicana	M-L	Fotocolecta	C	2015	San Pedro Yolox	2	MCF
Rodentia	Dasyproctidae	Dasyprocta	mexicana	Dasyprocta mexicana	M-L	Fotocolecta	C	2015	San Pedro Yolox	2	MCF
Rodentia	Dasyproctidae	Dasyprocta	mexicana	Dasyprocta mexicana	M-L	Fotocolecta	C	2015	San Pedro Yolox	2	MCF
Rodentia	Dasyproctidae	Dasyprocta	mexicana	Dasyprocta mexicana	M-L	Fotocolecta	C	2015	San Pedro Yolox	2	MCF
Rodentia	Dasyproctidae	Dasyprocta	mexicana	Dasyprocta mexicana	M-L	Fotocolecta	C	2015	San Pedro Yolox	2	MCF
Rodentia	Dasyproctidae	Dasyprocta	mexicana	Dasyprocta mexicana	M-L	Fotocolecta	C	2015	San Pedro Yolox	2	MCF
Rodentia	Dasyproctidae	Dasyprocta	mexicana	Dasyprocta mexicana	M-L	Fotocolecta	C	2015	San Pedro Yolox	2	MCF
Rodentia	Dasyproctidae	Dasyprocta	mexicana	Dasyprocta mexicana	M-L	Fotocolecta	C	2015	San Pedro Yolox	2	MCF
Rodentia	Dasyproctidae	Dasyprocta	mexicana	Dasyprocta mexicana	M-L	Fotocolecta	C	2015	San Pedro Yolox	2	MCF
Rodentia	Dasyproctidae	Dasyprocta	mexicana	Dasyprocta mexicana	M-L	Fotocolecta	C	2015	San Pedro Yolox	2	MCF
Rodentia	Dasyproctidae	Dasyprocta	mexicana	Dasyprocta mexicana	M-L	Fotocolecta	C	2015	San Pedro Yolox	2	MCF
Rodentia	Dasyproctidae	Dasyprocta	mexicana	Dasyprocta mexicana	M-L	Fotocolecta	C	2015	San Pedro Yolox	2	MCF
Rodentia	Dasyproctidae	Dasyprocta	mexicana	Dasyprocta mexicana	M-L	Fotocolecta	C	2015	San Pedro Yolox	2	MCF
Rodentia	Dasyproctidae	Dasyprocta	mexicana	Dasyprocta mexicana	M-L	Fotocolecta	C	2015	San Pedro Yolox	2	MCF
Rodentia	Dasyproctidae	Dasyprocta	mexicana	Dasyprocta mexicana	M-L	Fotocolecta	C	2015	San Pedro Yolox	2	MCF
Rodentia	Dasyproctidae	Dasyprocta	mexicana	Dasyprocta mexicana	M-L	Fotocolecta	C	2015	San Pedro Yolox	2	MCF
Rodentia	Dasyproctidae	Dasyprocta	mexicana	Dasyprocta mexicana	M-L	Fotocolecta	C	2015	San Pedro Yolox	2	MCF
Rodentia	Dasyproctidae	Dasyprocta	mexicana	Dasyprocta mexicana	M-L	Fotocolecta	C	2015	San Pedro Yolox	2	MCF
Rodentia	Dasyproctidae	Dasyprocta	mexicana	Dasyprocta mexicana	M-L	Fotocolecta	C	2015	San Pedro Yolox	2	MCF
Rodentia	Dasyproctidae	Dasyprocta	mexicana	Dasyprocta mexicana	M-L	Fotocolecta	C	2015	San Pedro Yolox	2	MCF
Rodentia	Dasyproctidae	Dasyprocta	mexicana	Dasyprocta mexicana	M-L	Fotocolecta	C	2015	San Pedro Yolox	2	MCF
Rodentia	Dasyproctidae	Dasyprocta	mexicana	Dasyprocta mexicana	M-L	Fotocolecta	C	2015	San Pedro Yolox	2	MCF
Rodentia	Dasyproctidae	Dasyprocta	mexicana	Dasyprocta mexicana	M-L	Fotocolecta	C	2015	San Pedro Yolox	2	MCF
Rodentia	Dasyproctidae	Dasyprocta	mexicana	Dasyprocta mexicana	M-L	Fotocolecta	C	2015	San Pedro Yolox	2	MCF
Rodentia	Dasyproctidae	Dasyprocta	mexicana	Dasyprocta mexicana	M-L	Fotocolecta	C	2015	San Pedro Yolox	2	MCF
Rodentia	Dasyproctidae	Dasyprocta	mexicana	Dasyprocta mexicana	M-L	Fotocolecta	C	2015	San Pedro Yolox	2	MCF
Rodentia	Dasyproctidae	Dasyprocta	mexicana	Dasyprocta mexicana	M-L	Fotocolecta	C	2015	San Pedro Yolox	2	MCF
Rodentia	Dasyproctidae	Dasyprocta	mexicana	Dasyprocta mexicana	M-L	Fotocolecta	C	2015	San Pedro Yolox	2	MCF
Rodentia	Dasyproctidae	Dasyprocta	mexicana	Dasyprocta mexicana	M-L	Fotocolecta	C	2015	San Pedro Yolox	2	MCF
Rodentia	Dasyproctidae	Dasyprocta	mexicana	Dasyprocta mexicana	M-L	Fotocolecta	C	2015	San Pedro Yolox	2	MCF
Rodentia	Dasyproctidae	Dasyprocta	mexicana	Dasyprocta mexicana	M-L	Fotocolecta	C	2015	San Pedro Yolox	2	MCF
Rodentia	Dasyproctidae	Dasyprocta	mexicana	Dasyprocta mexicana	M-L	Fotocolecta	C	2015	San Pedro Yolox	2	MCF
Rodentia	Dasyproctidae	Dasyprocta	mexicana	Dasyprocta mexicana	M-L	Fotocolecta	C	2015	San Pedro Yolox	2	MCF
Rodentia	Dasyproctidae	Dasyprocta	mexicana	Dasyprocta mexicana	M-L	Fotocolecta	C	2015	San Pedro Yolox	2	MCF
Rodentia	Dasyproctidae	Dasyprocta	mexicana	Dasyprocta mexicana	M-L	Fotocolecta	C	2015	San Pedro Yolox	2	MCF
Rodentia	Dasyproctidae	Dasyprocta	mexicana	Dasyprocta mexicana	M-L	Fotocolecta	C	2015	San Pedro Yolox	2	MCF
Rodentia	Dasyproctidae	Dasyprocta	mexicana	Dasyprocta mexicana	M-L	Fotocolecta	C	2015	San Pedro Yolox	2	MCF
Rodentia	Dasyproctidae	Dasyprocta	mexicana	Dasyprocta mexicana	M-L	Fotocolecta	C	2015	San Pedro Yolox	2	MCF
Rodentia	Dasyproctidae	Dasyprocta	mexicana	Dasyprocta mexicana	M-L	Fotocolecta	C	2015	San Pedro Yolox	2	MCF
Rodentia	Dasyproctidae	Dasyprocta	mexicana	Dasyprocta mexicana	M-L	Fotocolecta	C	2015	San Pedro Yolox	2	MCF
Rodentia	Dasyproctidae	Dasyprocta	mexicana	Dasyprocta mexicana	M-L	Fotocolecta	C	2015	San Pedro Yolox	2	MCF
Rodentia	Dasyproctidae	Dasyprocta	mexicana	Dasyprocta mexicana	M-L	Fotocolecta	C	2015	San Pedro Yolox	2	MCF
Rodentia	Dasyproctidae	Dasyprocta	mexicana	Dasyprocta mexicana	M-L	Fotocolecta	C	2015	San Pedro Yolox	2	MCF
Rodentia	Dasyproctidae	Dasyprocta	mexicana	Dasyprocta mexicana	M-L	Fotocolecta	C	2015	San Pedro Yolox	2	MCF
Rodentia	Dasyproctidae	Dasyprocta	mexicana	Dasyprocta mexicana	M-L	Fotocolecta	C	2015	San Pedro Yolox	2	MCF
Rodentia	Dasyproctidae	Dasyprocta	mexicana	Dasyprocta mexicana	M-L	Fotocolecta	C	2015	San Pedro Yolox	2	MCF
Rodentia	Dasyproctidae	Dasyprocta	mexicana	Dasyprocta mexicana	M-L	Fotocolecta	C	2015	San Pedro Yolox	2	MCF
Rodentia	Dasyproctidae	Dasyprocta	mexicana	Dasyprocta mexicana	M-L	Fotocolecta	C	2015	San Pedro Yolox	2	MCF
Rodentia	Dasyproctidae	Dasyprocta	mexicana	Dasyprocta mexicana	M-L	Fotocolecta	C	2015	San Pedro Yolox	2	MCF
Rodentia	Dasyproctidae	Dasyprocta	mexicana	Dasyprocta mexicana	M-L	Fotocolecta	C	2015	San Pedro Yolox	2	MCF
Rodentia	Dasyproctidae	Dasyprocta	mexicana	Dasyprocta mexicana	M-L	Fotocolecta	C	2015	San Pedro Yolox	2	MCF
Rodentia	Dasyproctidae	Dasyprocta	mexicana	Dasyprocta mexicana	M-L	Fotocolecta	C	2015	San Pedro Yolox	2	MCF
Rodentia	Dasyproctidae	Dasyprocta	mexicana	Dasyprocta mexicana	M-L	Fotocolecta	C	2015	San Pedro Yolox	2	MCF
Rodentia	Dasyproctidae	Dasyprocta	mexicana	Dasyprocta mexicana	M-L	Fotocolecta	C	2015	San Pedro Yolox	2	MCF
Rodentia	Dasyproctidae	Dasyprocta	mexicana	Dasyprocta mexicana	M-L	Fotocolecta	C	2015	San Pedro Yolox	2	MCF
Rodentia	Dasyproctidae	Dasyprocta	mexicana	Dasyprocta mexicana	M-L	Fotocolecta	C	2015	San Pedro Yolox	2	MCF
Rodentia	Dasyproctidae	Dasyprocta	mexicana	Dasyprocta mexicana	M-L	Fotocolecta	C	2015	San Pedro Yolox	2	MCF
Rodentia	Dasyproctidae	Dasyprocta	mexicana	Dasyprocta mexicana	M-L	Fotocolecta	C	2015	San Pedro Yolox	2	MCF
Rodentia	Dasyproctidae	Dasyprocta	mexicana	Dasyprocta mexicana	M-L	Fotocolecta	C	2015	San Pedro Yólox	2	MCF
Rodentia	Dasyproctidae	Dasyprocta	mexicana	Dasyprocta mexicana	M-L	Fotocolecta	C	2015	San Pedro Yólox	2	MCF
Rodentia	Dasyproctidae	Dasyprocta	mexicana	Dasyprocta mexicana	M-L	Fotocolecta	C	2015	San Pedro Yólox	2	MCF
Rodentia	Dasyproctidae	Dasyprocta	mexicana	Dasyprocta mexicana	M-L	Fotocolecta	C	2015	San Pedro Yólox	2	MCF
Rodentia	Dasyproctidae	Dasyprocta	mexicana	Dasyprocta mexicana	M-L	Fotocolecta	C	2015	San Pedro Yólox	2	MCF
Rodentia	Dasyproctidae	Dasyprocta	mexicana	Dasyprocta mexicana	M-L	Fotocolecta	C	2015	San Pedro Yólox	2	MCF
Rodentia	Dasyproctidae	Dasyprocta	mexicana	Dasyprocta mexicana	M-L	Fotocolecta	C	2015	San Pedro Yólox	2	MCF
Rodentia	Dasyproctidae	Dasyprocta	mexicana	Dasyprocta mexicana	M-L	Fotocolecta	C	2015	San Pedro Yólox	2	MCF
Rodentia	Dasyproctidae	Dasyprocta	mexicana	Dasyprocta mexicana	M-L	Fotocolecta	C	2015	San Pedro Yólox	2	MCF
Rodentia	Dasyproctidae	Dasyprocta	mexicana	Dasyprocta mexicana	M-L	Fotocolecta	C	2015	San Pedro Yólox	2	MCF
Rodentia	Dasyproctidae	Dasyprocta	mexicana	Dasyprocta mexicana	M-L	Fotocolecta	C	2015	San Pedro Yólox	2	MCF
Rodentia	Dasyproctidae	Dasyprocta	mexicana	Dasyprocta mexicana	M-L	Fotocolecta	C	2015	San Pedro Yólox	2	MCF
Rodentia	Dasyproctidae	Dasyprocta	mexicana	Dasyprocta mexicana	M-L	Fotocolecta	C	2015	San Pedro Yólox	2	MCF
Rodentia	Dasyproctidae	Dasyprocta	mexicana	Dasyprocta mexicana	M-L	Fotocolecta	C	2015	San Pedro Yólox	2	MCF
Rodentia	Dasyproctidae	Dasyprocta	mexicana	Dasyprocta mexicana	M-L	Fotocolecta	C	2015	San Pedro Yólox	2	MCF
Rodentia	Dasyproctidae	Dasyprocta	mexicana	Dasyprocta mexicana	M-L	Fotocolecta	C	2015	San Pedro Yólox	2	MCF
Rodentia	Dasyproctidae	Dasyprocta	mexicana	Dasyprocta mexicana	M-L	Fotocolecta	C	2015	San Pedro Yólox	2	MCF
Rodentia	Dasyproctidae	Dasyprocta	mexicana	Dasyprocta mexicana	M-L	Fotocolecta	C	2015	San Pedro Yólox	2	MCF
Rodentia	Dasyproctidae	Dasyprocta	mexicana	Dasyprocta mexicana	M-L	Fotocolecta	C	2015	San Pedro Yólox	2	MCF
Rodentia	Dasyproctidae	Dasyprocta	mexicana	Dasyprocta mexicana	M-L	Fotocolecta	C	2015	San Pedro Yólox	2	MCF
Rodentia	Dasyproctidae	Dasyprocta	mexicana	Dasyprocta mexicana	M-L	Fotocolecta	C	2015	San Pedro Yólox	2	MCF
Rodentia	Dasyproctidae	Dasyprocta	mexicana	Dasyprocta mexicana	M-L	Fotocolecta	C	2015	San Pedro Yólox	2	MCF
Rodentia	Dasyproctidae	Dasyprocta	mexicana	Dasyprocta mexicana	M-L	Fotocolecta	C	2015	San Pedro Yólox	2	MCF
Rodentia	Dasyproctidae	Dasyprocta	mexicana	Dasyprocta mexicana	M-L	Fotocolecta	C	2015	San Pedro Yólox	2	MCF
Rodentia	Dasyproctidae	Dasyprocta	mexicana	Dasyprocta mexicana	M-L	Fotocolecta	C	2015	San Pedro Yólox	2	MCF
Rodentia	Dasyproctidae	Dasyprocta	mexicana	Dasyprocta mexicana	M-L	Fotocolecta	C	2015	San Pedro Yólox	2	MCF
Rodentia	Dasyproctidae	Dasyprocta	mexicana	Dasyprocta mexicana	M-L	Fotocolecta	C	2015	San Pedro Yólox	2	MCF
Rodentia	Dasyproctidae	Dasyprocta	mexicana	Dasyprocta mexicana	M-L	Fotocolecta	C	2015	San Pedro Yólox	2	MCF
Rodentia	Dasyproctidae	Dasyprocta	mexicana	Dasyprocta mexicana	M-L	Fotocolecta	C	2015	San Pedro Yólox	2	MCF
Rodentia	Dasyproctidae	Dasyprocta	mexicana	Dasyprocta mexicana	M-L	Fotocolecta	C	2015	San Pedro Yólox	2	MCF
Rodentia	Dasyproctidae	Dasyprocta	mexicana	Dasyprocta mexicana	M-L	Fotocolecta	C	2015	San Pedro Yólox	2	MCF
Rodentia	Dasyproctidae	Dasyprocta	mexicana	Dasyprocta mexicana	M-L	Fotocolecta	C	2015	San Pedro Yólox	2	MCF
Rodentia	Dasyproctidae	Dasyprocta	mexicana	Dasyprocta mexicana	M-L	Fotocolecta	C	2015	San Pedro Yólox	2	MCF
Rodentia	Dasyproctidae	Dasyprocta	mexicana	Dasyprocta mexicana	M-L	Fotocolecta	C	2015	San Pedro Yólox	2	MCF
Rodentia	Dasyproctidae	Dasyprocta	mexicana	Dasyprocta mexicana	M-L	Fotocolecta	C	2015	San Pedro Yólox	2	MCF
Rodentia	Dasyproctidae	Dasyprocta	mexicana	Dasyprocta mexicana	M-L	Fotocolecta	C	2015	San Pedro Yólox	2	MCF
Rodentia	Dasyproctidae	Dasyprocta	mexicana	Dasyprocta mexicana	M-L	Fotocolecta	C	2015	San Pedro Yólox	2	MCF
Rodentia	Dasyproctidae	Dasyprocta	mexicana	Dasyprocta mexicana	M-L	Fotocolecta	C	2015	San Pedro Yólox	2	MCF
Rodentia	Dasyproctidae	Dasyprocta	mexicana	Dasyprocta mexicana	M-L	Fotocolecta	C	2015	San Pedro Yólox	2	MCF
Rodentia	Dasyproctidae	Dasyprocta	mexicana	Dasyprocta mexicana	M-L	Fotocolecta	C	2015	San Pedro Yólox	2	MCF
Rodentia	Dasyproctidae	Dasyprocta	mexicana	Dasyprocta mexicana	M-L	Fotocolecta	C	2015	San Pedro Yólox	2	MCF
Rodentia	Dasyproctidae	Dasyprocta	mexicana	Dasyprocta mexicana	M-L	Fotocolecta	C	2015	San Pedro Yólox	2	MCF
Rodentia	Dasyproctidae	Dasyprocta	mexicana	Dasyprocta mexicana	M-L	Fotocolecta	C	2015	San Pedro Yólox	2	MCF
Rodentia	Dasyproctidae	Dasyprocta	mexicana	Dasyprocta mexicana	M-L	Fotocolecta	C	2015	San Pedro Yólox	2	MCF
Rodentia	Dasyproctidae	Dasyprocta	mexicana	Dasyprocta mexicana	M-L	Fotocolecta	C	2015	San Pedro Yólox	2	MCF
Rodentia	Dasyproctidae	Dasyprocta	mexicana	Dasyprocta mexicana	M-L	Fotocolecta	C	2015	San Pedro Yólox	2	MCF
Rodentia	Dasyproctidae	Dasyprocta	mexicana	Dasyprocta mexicana	M-L	Fotocolecta	C	2015	San Pedro Yólox	2	MCF
Rodentia	Dasyproctidae	Dasyprocta	mexicana	Dasyprocta mexicana	M-L	Fotocolecta	C	2015	San Pedro Yólox	2	MCF
Rodentia	Dasyproctidae	Dasyprocta	mexicana	Dasyprocta mexicana	M-L	Fotocolecta	C	2015	San Pedro Yólox	2	MCF
Rodentia	Dasyproctidae	Dasyprocta	mexicana	Dasyprocta mexicana	M-L	Fotocolecta	C	2015	San Pedro Yólox	2	MCF
Rodentia	Dasyproctidae	Dasyprocta	mexicana	Dasyprocta mexicana	M-L	Fotocolecta	C	2015	San Pedro Yólox	2	MCF
Rodentia	Dasyproctidae	Dasyprocta	mexicana	Dasyprocta mexicana	M-L	Fotocolecta	C	2015	San Pedro Yólox	2	MCF
Rodentia	Dasyproctidae	Dasyprocta	mexicana	Dasyprocta mexicana	M-L	Fotocolecta	C	2015	San Pedro Yólox	2	MCF
Rodentia	Dasyproctidae	Dasyprocta	mexicana	Dasyprocta mexicana	M-L	Fotocolecta	C	2015	San Pedro Yólox	2	MCF
Rodentia	Dasyproctidae	Dasyprocta	mexicana	Dasyprocta mexicana	M-L	Fotocolecta	C	2015	San Pedro Yólox	2	MCF
Rodentia	Dasyproctidae	Dasyprocta	mexicana	Dasyprocta mexicana	M-L	Fotocolecta	C	2015	San Pedro Yólox	2	MCF
Rodentia	Dasyproctidae	Dasyprocta	mexicana	Dasyprocta mexicana	M-L	Fotocolecta	C	2015	San Pedro Yólox	2	MCF
Rodentia	Dasyproctidae	Dasyprocta	mexicana	Dasyprocta mexicana	M-L	Fotocolecta	C	2015	San Pedro Yólox	3	MCF
Cingulata	Dasypodidae	Dasypus	novemcintus	Dasypus novemcinctus	M-L	Fotocolecta	C	2015	San Pedro Yólox	2	MCF
Cingulata	Dasypodidae	Dasypus	novemcintus	Dasypus novemcinctus	M-L	UNSIJ	C	2015	Santiago Comaltepec	3	MCF
Artiodactyla	Tayassuidae	Dicotyles	angulatus	Dicotyles angulatus	M-L	UNSIJ	C	2015	Santiago Comaltepec	3	MCF
Didelphimorphia	Didelphidae	Didelphis	marsupialis	Didelphis marsupialis	M-L	UNSIJ	C	2015	Santiago Comaltepec	3	MCF
Didelphimorphia	Didelphidae	Didelphis	virginiana	Didelphis virginiana	M-L	Fotocolecta	C	2016	San Pedro Yólox	3	MCF
Didelphimorphia	Didelphidae	Didelphis	virginiana	Didelphis virginiana	M-L	Fotocolecta	C	2016	San Pedro Yólox	3	MCF
Didelphimorphia	Didelphidae	Didelphis	virginiana	Didelphis virginiana	M-L	Fotocolecta	C	2015	San Pedro Yolox	2	MCF
Didelphimorphia	Didelphidae	Didelphis	virginiana	Didelphis virginiana	M-L	Fotocolecta	C	2015	San Pedro Yólox	3	MCF
Carnivora	Mustelidae	Eira	barbara	Eira barbara	M-L	UNSIJ	C	2015	Santiago Comaltepec	3	MCF
Artiodactyla	Cervidae	Mazama	temama	Mazama temama	M-L	Fotocolecta	C	2016	San Pedro Yólox	3	MCF
Artiodactyla	Cervidae	Mazama	temama	Mazama temama	M-L	Fotocolecta	C	2016	San Pedro Yólox	3	MCF
Artiodactyla	Cervidae	Mazama	temama	Mazama temama	M-L	Fotocolecta	C	2016	San Pedro Yólox	3	MCF
Artiodactyla	Cervidae	Mazama	temama	Mazama temama	M-L	Fotocolecta	C	2015	San Pedro Yolox	2	MCF
Artiodactyla	Cervidae	Mazama	temama	Mazama temama	M-L	Fotocolecta	C	2015	San Pedro Yolox	3	MCF
Artiodactyla	Cervidae	Mazama	temama	Mazama temama	M-L	Fotocolecta	C	2015	San Pedro Yolox	3	MCF
Artiodactyla	Cervidae	Mazama	temama	Mazama temama	M-L	Fotocolecta	C	2015	San Pedro Yolox	3	MCF
Artiodactyla	Cervidae	Mazama	temama	Mazama temama	M-L	Fotocolecta	C	2015	San Pedro Yólox	2	MCF
Artiodactyla	Cervidae	Mazama	temama	Mazama temama	M-L	Fotocolecta	C	2015	San Pedro Yólox	2	MCF
Artiodactyla	Cervidae	Mazama	temama	Mazama temama	M-L	Fotocolecta	C	2015	San Pedro Yólox	2	MCF
Artiodactyla	Cervidae	Mazama	temama	Mazama temama	M-L	Fotocolecta	C	2015	San Pedro Yólox	2	MCF
Artiodactyla	Cervidae	Mazama	temama	Mazama temama	M-L	Fotocolecta	C	2015	San Pedro Yólox	2	MCF
Artiodactyla	Cervidae	Mazama	temama	Mazama temama	M-L	Fotocolecta	C	2015	San Pedro Yólox	2	MCF
Carnivora	Mephitidae	Mephitis	macroura	Mephitis macroura	M-L	UNSIJ	C	2015	Santiago Comaltepec	3	MCF
Carnivora	Procyonidae	Nasua	narica	Nasua narica	M-L	Fotocolecta	C	2015	San Pedro Yolox	3	MCF
Carnivora	Procyonidae	Nasua	narica	Nasua narica	M-L	Fotocolecta	C	2015	San Pedro Yólox	2	MCF
Carnivora	Procyonidae	Nasua	narica	Nasua narica	M-L	Fotocolecta	C	2015	San Pedro Yólox	3	MCF
Carnivora	Procyonidae	Nasua	narica	Nasua narica	M-L	Fotocolecta	C	2015	San Pedro Yólox	3	MCF
Carnivora	Procyonidae	Nasua	narica	Nasua narica	M-L	Fotocolecta	C	2015	San Pedro Yólox	3	MCF
Carnivora	Procyonidae	Nasua	narica	Nasua narica	M-L	Fotocolecta	C	2015	San Pedro Yólox	3	MCF
Carnivora	Procyonidae	Nasua	narica	Nasua narica	M-L	Fotocolecta	C	2015	San Pedro Yólox	3	MCF
Carnivora	Procyonidae	Nasua	narica	Nasua narica	M-L	Fotocolecta	C	2015	San Pedro Yólox	3	MCF
Carnivora	Procyonidae	Nasua	narica	Nasua narica	M-L	Fotocolecta	C	2015	San Pedro Yólox	3	MCF
Carnivora	Procyonidae	Nasua	narica	Nasua narica	M-L	Fotocolecta	C	2015	San Pedro Yólox	3	MCF
Carnivora	Procyonidae	Nasua	narica	Nasua narica	M-L	Fotocolecta	C	2015	San Pedro Yólox	3	MCF
Carnivora	Procyonidae	Nasua	narica	Nasua narica	M-L	UNSIJ	C	2015	Santiago Comaltepec	3	MCF
Artiodactyla	Cervidae	Ocoideleus	virginianus	Odocoileus virginianus	M-L	UNSIJ	C	2015	Santiago Comaltepec	4	MCF
Artiodactyla	Cervidae	Ocoideleus	virginianus	Odocoileus virginianus	M-L	UNSIJ	C	2015	Santiago Comaltepec	4	MCF
Carnivora	Felidae	Panthera	onca	Panthera onca	M-L	Coleccion Mastozoologica, CIIDIR-IPN Unidad Oaxaca	C	1998	Santiago Comaltepec	2	MCF
Carnivora	Felidae	Panthera	onca	Panthera onca	M-L	Coleccion Mastozoologica, CIIDIR-IPN Unidad Oaxaca	C	2004	Santiago Comaltepec	2	MCF
Carnivora	Felidae	Puma	concolor	Puma concolor	M-L	Fotocolecta	C	2015	San Pedro Yolox	3	MCF
Carnivora	Felidae	Puma	concolor	Puma concolor	M-L	Fotocolecta	C	2015	San Pedro Yolox	3	MCF
Carnivora	Felidae	Puma	concolor	Puma concolor	M-L	Fotocolecta	C	2015	San Pedro Yolox	3	MCF
Carnivora	Felidae	Puma	concolor	Puma concolor	M-L	Fotocolecta	C	2015	San Pedro Yolox	3	MCF
Carnivora	Felidae	Puma	concolor	Puma concolor	M-L	Fotocolecta	C	2015	San Pedro Yolox	3	MCF
Carnivora	Felidae	Puma	concolor	Puma concolor	M-L	Fotocolecta	C	2015	San Pedro Yolox	3	MCF
Carnivora	Felidae	Puma	concolor	Puma concolor	M-L	Fotocolecta	C	2015	San Pedro Yólox	3	MCF
Rodentia	Sciuridae	Sciurus	aureogaster	Sciurus aureogaster	M-L	Fotocolecta	C	2015	San Pedro Yolox	2	MCF
Rodentia	Sciuridae	Sciurus	aureogaster	Sciurus aureogaster	M-L	Fotocolecta	C	2015	San Pedro Yolox	2	MCF
Rodentia	Sciuridae	Sciurus	aureogaster	Sciurus aureogaster	M-L	Fotocolecta	C	2015	San Pedro Yolox	2	MCF
Rodentia	Sciuridae	Sciurus	aureogaster	Sciurus aureogaster	M-L	Fotocolecta	C	2015	San Pedro Yolox	2	MCF
Rodentia	Sciuridae	Sciurus	aureogaster	Sciurus aureogaster	M-L	Fotocolecta	C	2015	San Pedro Yolox	2	MCF
Rodentia	Sciuridae	Sciurus	aureogaster	Sciurus aureogaster	M-L	Fotocolecta	C	2015	San Pedro Yolox	2	MCF
Rodentia	Sciuridae	Sciurus	aureogaster	Sciurus aureogaster	M-L	Fotocolecta	C	2015	San Pedro Yólox	2	MCF
Rodentia	Sciuridae	Sciurus	aureogaster	Sciurus aureogaster	M-L	Fotocolecta	C	2015	San Pedro Yólox	2	MCF
Rodentia	Sciuridae	Sciurus	aureogaster	Sciurus aureogaster	M-L	Fotocolecta	C	2015	San Pedro Yólox	2	MCF
Rodentia	Sciuridae	Sciurus	aureogaster	Sciurus aureogaster	M-L	Fotocolecta	C	2015	San Pedro Yólox	2	MCF
Rodentia	Sciuridae	Sciurus	aureogaster	Sciurus aureogaster	M-L	Fotocolecta	C	2015	San Pedro Yólox	2	MCF
Rodentia	Sciuridae	Sciurus	aureogaster	Sciurus aureogaster	M-L	Fotocolecta	C	2015	San Pedro Yólox	2	MCF
Rodentia	Sciuridae	Sciurus	aureogaster	Sciurus aureogaster	M-L	Fotocolecta	C	2015	San Pedro Yólox	2	MCF
Rodentia	Sciuridae	Sciurus	aureogaster	Sciurus aureogaster	M-L	Fotocolecta	C	2015	San Pedro Yólox	2	MCF
Rodentia	Sciuridae	Sciurus	aureogaster	Sciurus aureogaster	M-L	UNSIJ	C	2015	Santiago Comaltepec	3	MCF
Rodentia	Sciuridae	Sciurus	aureogaster	Sciurus aureogaster	M-L	UNSIJ	C	2015	Santiago Comaltepec	4	MCF
Rodentia	Sciuridae	Sciurus	deppei	Sciurus deppei	M-L	Fotocolecta	C	2015	San Pedro Yolox	2	MCF
Rodentia	Sciuridae	Sciurus	deppei	Sciurus deppei	M-L	Fotocolecta	C	2015	San Pedro Yolox	2	MCF
Rodentia	Sciuridae	Sciurus	deppei	Sciurus deppei	M-L	Fotocolecta	C	2015	San Pedro Yolox	3	MCF
Rodentia	Sciuridae	Sciurus	deppei	Sciurus deppei	M-L	Fotocolecta	C	2015	San Pedro Yólox	2	MCF
Rodentia	Sciuridae	Sciurus	deppei	Sciurus deppei	M-L	Fotocolecta	C	2015	San Pedro Yólox	3	MCF
Rodentia	Sciuridae	Sciurus	deppei	Sciurus deppei	M-L	Fotocolecta	C	2015	San Pedro Yólox	3	MCF
Rodentia	Sciuridae	Sciurus	deppei	Sciurus deppei	M-L	Fotocolecta	C	2015	San Pedro Yólox	3	MCF
Rodentia	Sciuridae	Sciurus	deppei	Sciurus deppei	M-L	Fotocolecta	C	2015	San Pedro Yólox	3	MCF
Rodentia	Sciuridae	Sciurus	deppei	Sciurus deppei	M-L	Fotocolecta	C	2015	San Pedro Yólox	3	MCF
Rodentia	Sciuridae	Sciurus	deppei	Sciurus deppei	M-L	Fotocolecta	C	2015	San Pedro Yólox	3	MCF
Rodentia	Sciuridae	Sciurus	deppei	Sciurus deppei	M-L	Fotocolecta	C	2015	San Pedro Yólox	3	MCF
Rodentia	Sciuridae	Sciurus	deppei	Sciurus deppei	M-L	Fotocolecta	C	2015	San Pedro Yólox	3	MCF
Rodentia	Sciuridae	Sciurus	deppei	Sciurus deppei	M-L	Fotocolecta	C	2015	San Pedro Yólox	3	MCF
Rodentia	Sciuridae	Sciurus	deppei	Sciurus deppei	M-L	Fotocolecta	C	2015	San Pedro Yólox	3	MCF
Rodentia	Sciuridae	Sciurus	deppei	Sciurus deppei	M-L	Fotocolecta	C	2015	San Pedro Yólox	3	MCF
Rodentia	Sciuridae	Sciurus	deppei	Sciurus deppei	M-L	Fotocolecta	C	2015	San Pedro Yólox	3	MCF
Rodentia	Sciuridae	Sciurus	deppei	Sciurus deppei	M-L	Fotocolecta	C	2015	San Pedro Yólox	3	MCF
Rodentia	Sciuridae	Sciurus	deppei	Sciurus deppei	M-L	Fotocolecta	C	2015	San Pedro Yólox	3	MCF
Rodentia	Sciuridae	Sciurus	deppei	Sciurus deppei	M-L	Fotocolecta	C	2015	San Pedro Yólox	3	MCF
Rodentia	Sciuridae	Sciurus	deppei	Sciurus deppei	M-L	Fotocolecta	C	2015	San Pedro Yólox	3	MCF
Rodentia	Sciuridae	Sciurus	deppei	Sciurus deppei	M-L	Fotocolecta	C	2015	San Pedro Yólox	3	MCF
Rodentia	Sciuridae	Sciurus	deppei	Sciurus deppei	M-L	Fotocolecta	C	2015	San Pedro Yólox	3	MCF
Rodentia	Sciuridae	Sciurus	deppei	Sciurus deppei	M-L	Fotocolecta	C	2015	San Pedro Yólox	3	MCF
Rodentia	Sciuridae	Sciurus	deppei	Sciurus deppei	M-L	Fotocolecta	C	2015	San Pedro Yólox	3	MCF
Rodentia	Sciuridae	Sciurus	deppei	Sciurus deppei	M-L	Fotocolecta	C	2015	San Pedro Yólox	3	MCF
Rodentia	Sciuridae	Sciurus	deppei	Sciurus deppei	M-L	Fotocolecta	C	2015	San Pedro Yólox	3	MCF
Rodentia	Sciuridae	Sciurus	deppei	Sciurus deppei	M-L	Fotocolecta	C	2015	San Pedro Yólox	3	MCF
Rodentia	Sciuridae	Sciurus	deppei	Sciurus deppei	M-L	Fotocolecta	C	2015	San Pedro Yólox	3	MCF
Rodentia	Sciuridae	Sciurus	deppei	Sciurus deppei	M-L	Fotocolecta	C	2015	San Pedro Yólox	3	MCF
Rodentia	Sciuridae	Sciurus	deppei	Sciurus deppei	M-L	Fotocolecta	C	2015	San Pedro Yólox	3	MCF
Rodentia	Sciuridae	Sciurus	deppei	Sciurus deppei	M-L	Fotocolecta	C	2015	San Pedro Yólox	3	MCF
Rodentia	Sciuridae	Sciurus	deppei	Sciurus deppei	M-L	Fotocolecta	C	2015	San Pedro Yólox	3	MCF
Rodentia	Sciuridae	Sciurus	deppei	Sciurus deppei	M-L	Fotocolecta	C	2015	San Pedro Yólox	3	MCF
Rodentia	Sciuridae	Sciurus	deppei	Sciurus deppei	M-L	Fotocolecta	C	2015	San Pedro Yólox	3	MCF
Rodentia	Sciuridae	Sciurus	deppei	Sciurus deppei	M-L	Fotocolecta	C	2015	San Pedro Yólox	3	MCF
Rodentia	Sciuridae	Sciurus	deppei	Sciurus deppei	M-L	Fotocolecta	C	2015	San Pedro Yólox	3	MCF
Rodentia	Sciuridae	Sciurus	deppei	Sciurus deppei	M-L	Fotocolecta	C	2015	San Pedro Yólox	3	MCF
Rodentia	Sciuridae	Sciurus	deppei	Sciurus deppei	M-L	Fotocolecta	C	2015	San Pedro Yólox	3	MCF
Rodentia	Sciuridae	Sciurus	deppei	Sciurus deppei	M-L	Fotocolecta	C	2015	San Pedro Yólox	3	MCF
Rodentia	Sciuridae	Sciurus	deppei	Sciurus deppei	M-L	Fotocolecta	C	2015	San Pedro Yólox	3	MCF
Rodentia	Sciuridae	Sciurus	deppei	Sciurus deppei	M-L	Fotocolecta	C	2015	San Pedro Yólox	3	MCF
Rodentia	Sciuridae	Sciurus	deppei	Sciurus deppei	M-L	Fotocolecta	C	2015	San Pedro Yólox	3	MCF
Rodentia	Sciuridae	Sciurus	deppei	Sciurus deppei	M-L	Fotocolecta	C	2015	San Pedro Yólox	3	MCF
Rodentia	Sciuridae	Sciurus	deppei	Sciurus deppei	M-L	Fotocolecta	C	2015	San Pedro Yólox	3	MCF
Lagomorpha	Leporidae	Sylvilagus	floridanus	Sylvilagus floridanus	M-L	UNSIJ	C	2015	Santiago Comaltepec	4	MCF
Carnivora	Canidae	Urocyon	cinereoargenteus	Urocyon cinereoargenteus	M-L	Coleccion Mastozoologica, CIIDIR-IPN Unidad Oaxaca	C	2009	Santiago Comaltepec	3	MCF
Carnivora	Canidae	Urocyon	cinereoargenteus	Urocyon cinereoargenteus	M-L	UNSIJ	C	2015	Santiago Comaltepec	3	MCF
Carnivora	Canidae	Urocyon	cinereoargenteus	Urocyon cinereoargenteus	M-L	UNSIJ	C	2015	Santiago Comaltepec	4	MCF
Carnivora	Canidae	Urocyon	cinereoargenteus	Urocyon cinereoargenteus	M-L	UNSIJ	C	2015	Santiago Comaltepec	4	MCF
Carnivora	Mustelidae	Lontra	longicaudis	Lontra longicaudis	M-L	Coleccion Mastozoologica, CIIDIR-IPN Unidad Oaxaca	C	2009	Santiago Comaltepec	1	MCF
Carnivora	Canidae	Canis	latrans	Canis latrans	M-L	UNSIJ	C	2015	Santiago Comaltepec	4	P-OF
Artiodactyla	Tayassuidae	Dicotyles	angulatus	Dicotyles angulatus	M-L	Fotocolecta	C	2015	San Pedro Yolox	3	P-OF
Artiodactyla	Tayassuidae	Dicotyles	angulatus	Dicotyles angulatus	M-L	Fotocolecta	C	2015	San Pedro Yolox	3	P-OF
Artiodactyla	Tayassuidae	Dicotyles	angulatus	Dicotyles angulatus	M-L	Fotocolecta	C	2015	San Pedro Yolox	3	P-OF
Artiodactyla	Tayassuidae	Dicotyles	angulatus	Dicotyles angulatus	M-L	Fotocolecta	C	2015	San Pedro Yolox	4	P-OF
Artiodactyla	Tayassuidae	Dicotyles	angulatus	Dicotyles angulatus	M-L	Fotocolecta	C	2015	San Pedro Yolox	4	P-OF
Artiodactyla	Tayassuidae	Dicotyles	angulatus	Dicotyles angulatus	M-L	Fotocolecta	C	2015	San Pedro Yolox	4	P-OF
Artiodactyla	Tayassuidae	Dicotyles	angulatus	Dicotyles angulatus	M-L	Fotocolecta	C	2015	San Pedro Yolox	4	P-OF
Artiodactyla	Tayassuidae	Dicotyles	angulatus	Dicotyles angulatus	M-L	Fotocolecta	C	2015	San Pedro Yolox	4	P-OF
Artiodactyla	Tayassuidae	Dicotyles	angulatus	Dicotyles angulatus	M-L	Fotocolecta	C	2015	San Pedro Yolox	4	P-OF
Artiodactyla	Tayassuidae	Dicotyles	angulatus	Dicotyles angulatus	M-L	Fotocolecta	C	2015	San Pedro Yolox	4	P-OF
Artiodactyla	Tayassuidae	Dicotyles	angulatus	Dicotyles angulatus	M-L	Fotocolecta	C	2015	San Pedro Yolox	4	P-OF
Artiodactyla	Tayassuidae	Dicotyles	angulatus	Dicotyles angulatus	M-L	Fotocolecta	C	2015	San Pedro Yolox	4	P-OF
Artiodactyla	Tayassuidae	Dicotyles	angulatus	Dicotyles angulatus	M-L	Fotocolecta	C	2015	San Pedro Yolox	4	P-OF
Artiodactyla	Tayassuidae	Dicotyles	angulatus	Dicotyles angulatus	M-L	Fotocolecta	C	2015	San Pedro Yolox	4	P-OF
Artiodactyla	Tayassuidae	Dicotyles	angulatus	Dicotyles angulatus	M-L	Fotocolecta	C	2015	San Pedro Yolox	4	P-OF
Artiodactyla	Tayassuidae	Dicotyles	angulatus	Dicotyles angulatus	M-L	Fotocolecta	C	2015	San Pedro Yolox	4	P-OF
Artiodactyla	Tayassuidae	Dicotyles	angulatus	Dicotyles angulatus	M-L	Fotocolecta	C	2015	San Pedro Yolox	4	P-OF
Carnivora	Felidae	Leopardus	pardalis	Leopardus pardalis	M-L	Fotocolecta	C	2015	San Pedro Yolox	4	P-OF
Carnivora	Mephitidae	Mephitis	macroura	Mephitis macroura	M-L	Coleccion Mastozoologica, CIIDIR-IPN Unidad Oaxaca	C	2003	Santiago Comaltepec	4	P-OF
Carnivora	Mustelidae	Mustela	frenata	Mustela frenata	M-L	Coleccion Mastozoologica, CIIDIR-IPN Unidad Oaxaca	C	2003	Santiago Comaltepec	4	P-OF
Artiodactyla	Cervidae	Ocoideleus	virginianus	Odocoileus virginianus	M-L	Fotocolecta	C	2015	San Pedro Yólox	4	P-OF
Artiodactyla	Cervidae	Ocoideleus	virginianus	Odocoileus virginianus	M-L	Fotocolecta	C	2015	San Pedro Yólox	4	P-OF
Artiodactyla	Cervidae	Ocoideleus	virginianus	Odocoileus virginianus	M-L	Fotocolecta	C	2015	San Pedro Yólox	4	P-OF
Artiodactyla	Cervidae	Ocoideleus	virginianus	Odocoileus virginianus	M-L	Fotocolecta	C	2015	San Pedro Yólox	4	P-OF
Carnivora	Procyonidae	Procyon	lotor	Procyon lotor	M-L	Coleccion Mastozoologica, CIIDIR-IPN Unidad Oaxaca	C	2003	Santiago Comaltepec	4	P-OF
Carnivora	Procyonidae	Procyon	lotor	Procyon lotor	M-L	Coleccion Mastozoologica, CIIDIR-IPN Unidad Oaxaca	C	2004	Santiago Comaltepec	4	P-OF
Carnivora	Felidae	Puma	concolor	Puma concolor	M-L	Coleccion Mastozoologica, CIIDIR-IPN Unidad Oaxaca	C	2003	Santiago Comaltepec	4	P-OF
Carnivora	Felidae	Puma	concolor	Puma concolor	M-L	Coleccion Mastozoologica, CIIDIR-IPN Unidad Oaxaca	C	2003	Santiago Comaltepec	4	P-OF
Rodentia	Sciuridae	Sciurus	aureogaster	Sciurus aureogaster	M-L	Fotocolecta	C	2015	San Pedro Yolox	4	P-OF
Rodentia	Sciuridae	Sciurus	deppei	Sciurus deppei	M-L	Fotocolecta	C	2015	San Pedro Yolox	4	P-OF
Rodentia	Sciuridae	Sciurus	deppei	Sciurus deppei	M-L	Fotocolecta	C	2015	San Pedro Yolox	4	P-OF
Rodentia	Sciuridae	Sciurus	deppei	Sciurus deppei	M-L	Fotocolecta	C	2015	San Pedro Yolox	4	P-OF
Rodentia	Sciuridae	Sciurus	deppei	Sciurus deppei	M-L	Fotocolecta	C	2015	San Pedro Yólox	4	P-OF
Carnivora	Mephitidae	Spilogale	angustifrons	Spilogale angustifron	M-L	Coleccion Mastozoologica, CIIDIR-IPN Unidad Oaxaca	C	1999	Santiago Comaltepec	4	P-OF
Carnivora	Canidae	Urocyon	cinereoargenteus	Urocyon cinereoargenteus	M-L	Coleccion Mastozoologica, CIIDIR-IPN Unidad Oaxaca	C	2003	Santiago Comaltepec	4	P-OF
Carnivora	Canidae	Urocyon	cinereoargenteus	Urocyon cinereoargenteus	M-L	Coleccion Mastozoologica, CIIDIR-IPN Unidad Oaxaca	C	2004	Santiago Comaltepec	4	P-OF
Carnivora	Canidae	Urocyon	cinereoargenteus	Urocyon cinereoargenteus	M-L	UNSIJ	C	2015	Santiago Comaltepec	4	P-OF
Rodentia	Cuniculidae	Cuniculus	paca	Cuniculus paca	M-L	Fotocolecta	C	2015	San Pedro Yólox	2	TRF
Rodentia	Cuniculidae	Cuniculus	paca	Cuniculus paca	M-L	Fotocolecta	C	2015	San Pedro Yólox	2	TRF
Rodentia	Cuniculidae	Cuniculus	paca	Cuniculus paca	M-L	Fotocolecta	C	2015	San Pedro Yólox	2	TRF
Rodentia	Cuniculidae	Cuniculus	paca	Cuniculus paca	M-L	Fotocolecta	C	2015	San Pedro Yólox	2	TRF
Rodentia	Cuniculidae	Cuniculus	paca	Cuniculus paca	M-L	Fotocolecta	C	2015	San Pedro Yólox	2	TRF
Rodentia	Cuniculidae	Cuniculus	paca	Cuniculus paca	M-L	Fotocolecta	C	2015	San Pedro Yólox	2	TRF
Rodentia	Cuniculidae	Cuniculus	paca	Cuniculus paca	M-L	Fotocolecta	C	2015	San Pedro Yólox	2	TRF
Rodentia	Cuniculidae	Cuniculus	paca	Cuniculus paca	M-L	Fotocolecta	C	2015	San Pedro Yólox	2	TRF
Rodentia	Cuniculidae	Cuniculus	paca	Cuniculus paca	M-L	Fotocolecta	C	2015	San Pedro Yólox	2	TRF
Rodentia	Cuniculidae	Cuniculus	paca	Cuniculus paca	M-L	Fotocolecta	C	2015	San Pedro Yólox	2	TRF
Rodentia	Cuniculidae	Cuniculus	paca	Cuniculus paca	M-L	Fotocolecta	C	2015	San Pedro Yólox	2	TRF
Rodentia	Cuniculidae	Cuniculus	paca	Cuniculus paca	M-L	Fotocolecta	C	2015	San Pedro Yólox	2	TRF
Rodentia	Cuniculidae	Cuniculus	paca	Cuniculus paca	M-L	Fotocolecta	C	2015	San Pedro Yólox	2	TRF
Rodentia	Cuniculidae	Cuniculus	paca	Cuniculus paca	M-L	Fotocolecta	C	2015	San Pedro Yólox	2	TRF
Rodentia	Cuniculidae	Cuniculus	paca	Cuniculus paca	M-L	Fotocolecta	C	2015	San Pedro Yólox	2	TRF
Rodentia	Cuniculidae	Cuniculus	paca	Cuniculus paca	M-L	Fotocolecta	C	2015	San Pedro Yólox	2	TRF
Rodentia	Cuniculidae	Cuniculus	paca	Cuniculus paca	M-L	Fotocolecta	C	2015	San Pedro Yólox	2	TRF
Rodentia	Cuniculidae	Cuniculus	paca	Cuniculus paca	M-L	Fotocolecta	C	2015	San Pedro Yólox	2	TRF
Rodentia	Dasyproctidae	Dasyprocta	mexicana	Dasyprocta mexicana	M-L	Fotocolecta	C	2015	San Pedro Yolox	2	TRF
Rodentia	Dasyproctidae	Dasyprocta	mexicana	Dasyprocta mexicana	M-L	Fotocolecta	C	2015	San Pedro Yolox	2	TRF
Rodentia	Dasyproctidae	Dasyprocta	mexicana	Dasyprocta mexicana	M-L	Fotocolecta	C	2015	San Pedro Yólox	2	TRF
Rodentia	Dasyproctidae	Dasyprocta	mexicana	Dasyprocta mexicana	M-L	Fotocolecta	C	2015	San Pedro Yólox	2	TRF
Rodentia	Dasyproctidae	Dasyprocta	mexicana	Dasyprocta mexicana	M-L	Fotocolecta	C	2015	San Pedro Yólox	2	TRF
Rodentia	Dasyproctidae	Dasyprocta	mexicana	Dasyprocta mexicana	M-L	Fotocolecta	C	2015	San Pedro Yólox	2	TRF
Rodentia	Dasyproctidae	Dasyprocta	mexicana	Dasyprocta mexicana	M-L	Fotocolecta	C	2015	San Pedro Yólox	2	TRF
Rodentia	Dasyproctidae	Dasyprocta	mexicana	Dasyprocta mexicana	M-L	Fotocolecta	C	2015	San Pedro Yólox	2	TRF
Rodentia	Dasyproctidae	Dasyprocta	mexicana	Dasyprocta mexicana	M-L	Fotocolecta	C	2015	San Pedro Yólox	2	TRF
Rodentia	Dasyproctidae	Dasyprocta	mexicana	Dasyprocta mexicana	M-L	Fotocolecta	C	2015	San Pedro Yólox	2	TRF
Rodentia	Dasyproctidae	Dasyprocta	mexicana	Dasyprocta mexicana	M-L	Fotocolecta	C	2015	San Pedro Yólox	2	TRF
Rodentia	Dasyproctidae	Dasyprocta	mexicana	Dasyprocta mexicana	M-L	Fotocolecta	C	2015	San Pedro Yólox	2	TRF
Rodentia	Dasyproctidae	Dasyprocta	mexicana	Dasyprocta mexicana	M-L	Fotocolecta	C	2015	San Pedro Yólox	2	TRF
Rodentia	Dasyproctidae	Dasyprocta	mexicana	Dasyprocta mexicana	M-L	Fotocolecta	C	2015	San Pedro Yólox	2	TRF
Rodentia	Dasyproctidae	Dasyprocta	mexicana	Dasyprocta mexicana	M-L	Fotocolecta	C	2015	San Pedro Yólox	2	TRF
Rodentia	Dasyproctidae	Dasyprocta	mexicana	Dasyprocta mexicana	M-L	Fotocolecta	C	2015	San Pedro Yólox	2	TRF
Rodentia	Dasyproctidae	Dasyprocta	mexicana	Dasyprocta mexicana	M-L	Fotocolecta	C	2015	San Pedro Yólox	2	TRF
Rodentia	Dasyproctidae	Dasyprocta	mexicana	Dasyprocta mexicana	M-L	Fotocolecta	C	2015	San Pedro Yólox	2	TRF
Rodentia	Dasyproctidae	Dasyprocta	mexicana	Dasyprocta mexicana	M-L	Fotocolecta	C	2015	San Pedro Yólox	2	TRF
Rodentia	Dasyproctidae	Dasyprocta	mexicana	Dasyprocta mexicana	M-L	Fotocolecta	C	2015	San Pedro Yólox	2	TRF
Rodentia	Dasyproctidae	Dasyprocta	mexicana	Dasyprocta mexicana	M-L	Fotocolecta	C	2015	San Pedro Yólox	2	TRF
Rodentia	Dasyproctidae	Dasyprocta	mexicana	Dasyprocta mexicana	M-L	Fotocolecta	C	2015	San Pedro Yólox	2	TRF
Rodentia	Dasyproctidae	Dasyprocta	mexicana	Dasyprocta mexicana	M-L	Fotocolecta	C	2015	San Pedro Yólox	2	TRF
Rodentia	Dasyproctidae	Dasyprocta	mexicana	Dasyprocta mexicana	M-L	Fotocolecta	C	2015	San Pedro Yólox	2	TRF
Cingulata	Dasypodidae	Dasypus	novemcintus	Dasypus novemcinctus	M-L	Fotocolecta	C	2015	San Pedro Yólox	2	TRF
Artiodactyla	Tayassuidae	Dicotyles	angulatus	Dicotyles angulatus	M-L	Fotocolecta	C	2015	San Pedro Yólox	2	TRF
Artiodactyla	Tayassuidae	Dicotyles	angulatus	Dicotyles angulatus	M-L	Fotocolecta	C	2015	San Pedro Yólox	2	TRF
Artiodactyla	Tayassuidae	Dicotyles	angulatus	Dicotyles angulatus	M-L	Fotocolecta	C	2015	San Pedro Yólox	2	TRF
Didelphimorphia	Didelphidae	Didelphis	virginiana	Didelphis virginiana	M-L	Fotocolecta	C	2016	San Pedro Yólox	2	TRF
Didelphimorphia	Didelphidae	Didelphis	virginiana	Didelphis virginiana	M-L	Fotocolecta	C	2016	San Pedro Yólox	3	TRF
Didelphimorphia	Didelphidae	Didelphis	virginiana	Didelphis virginiana	M-L	Fotocolecta	C	2015	San Pedro Yólox	2	TRF
Didelphimorphia	Didelphidae	Didelphis	virginiana	Didelphis virginiana	M-L	Fotocolecta	C	2015	San Pedro Yólox	2	TRF
Didelphimorphia	Didelphidae	Didelphis	virginiana	Didelphis virginiana	M-L	Fotocolecta	C	2015	San Pedro Yólox	2	TRF
Didelphimorphia	Didelphidae	Didelphis	virginiana	Didelphis virginiana	M-L	Fotocolecta	C	2015	San Pedro Yólox	2	TRF
Didelphimorphia	Didelphidae	Didelphis	virginiana	Didelphis virginiana	M-L	Fotocolecta	C	2015	San Pedro Yólox	2	TRF
Didelphimorphia	Didelphidae	Didelphis	virginiana	Didelphis virginiana	M-L	Fotocolecta	C	2015	San Pedro Yólox	2	TRF
Didelphimorphia	Didelphidae	Didelphis	virginiana	Didelphis virginiana	M-L	Fotocolecta	C	2015	San Pedro Yólox	2	TRF
Didelphimorphia	Didelphidae	Didelphis	virginiana	Didelphis virginiana	M-L	Fotocolecta	C	2015	San Pedro Yólox	2	TRF
Didelphimorphia	Didelphidae	Didelphis	virginiana	Didelphis virginiana	M-L	Fotocolecta	C	2015	San Pedro Yólox	2	TRF
Carnivora	Mustelidae	Eira	barbara	Eira barbara	M-L	Fotocolecta	C	2016	San Pedro Yólox	3	TRF
Carnivora	Mustelidae	Eira	barbara	Eira barbara	M-L	Fotocolecta	C	2015	San Pedro Yolox	2	TRF
Carnivora	Mustelidae	Eira	barbara	Eira barbara	M-L	Fotocolecta	C	2015	San Pedro Yólox	2	TRF
Carnivora	Mustelidae	Eira	barbara	Eira barbara	M-L	Fotocolecta	C	2015	San Pedro Yólox	2	TRF
Carnivora	Mustelidae	Eira	barbara	Eira barbara	M-L	Fotocolecta	C	2015	San Pedro Yólox	2	TRF
Carnivora	Mustelidae	Eira	barbara	Eira barbara	M-L	Fotocolecta	C	2015	San Pedro Yólox	2	TRF
Carnivora	Mustelidae	Eira	barbara	Eira barbara	M-L	Fotocolecta	C	2015	San Pedro Yólox	2	TRF
Carnivora	Mustelidae	Eira	barbara	Eira barbara	M-L	Fotocolecta	C	2015	San Pedro Yólox	2	TRF
Carnivora	Mustelidae	Eira	barbara	Eira barbara	M-L	Fotocolecta	C	2015	San Pedro Yólox	2	TRF
Carnivora	Mustelidae	Eira	barbara	Eira barbara	M-L	Fotocolecta	C	2015	San Pedro Yólox	2	TRF
Carnivora	Mustelidae	Eira	barbara	Eira barbara	M-L	Fotocolecta	C	2015	San Pedro Yólox	2	TRF
Carnivora	Mustelidae	Eira	barbara	Eira barbara	M-L	Fotocolecta	C	2015	San Pedro Yólox	2	TRF
Carnivora	Mustelidae	Eira	barbara	Eira barbara	M-L	Fotocolecta	C	2015	San Pedro Yólox	2	TRF
Carnivora	Mustelidae	Eira	barbara	Eira barbara	M-L	Fotocolecta	C	2015	San Pedro Yólox	2	TRF
Carnivora	Mustelidae	Eira	barbara	Eira barbara	M-L	Fotocolecta	C	2015	San Pedro Yólox	2	TRF
Carnivora	Mustelidae	Eira	barbara	Eira barbara	M-L	Fotocolecta	C	2015	San Pedro Yólox	2	TRF
Carnivora	Felidae	Leopardus	pardalis	Leopardus pardalis	M-L	Fotocolecta	C	2015	San Pedro Yólox	2	TRF
Carnivora	Felidae	Leopardus	wiedii	Leopardus wiedii	M-L	Fotocolecta	C	2016	San Pedro Yólox	3	TRF
Artiodactyla	Cervidae	Mazama	temama	Mazama temama	M-L	Fotocolecta	C	2016	San Pedro Yólox	2	TRF
Artiodactyla	Cervidae	Mazama	temama	Mazama temama	M-L	Fotocolecta	C	2016	San Pedro Yólox	2	TRF
Artiodactyla	Cervidae	Mazama	temama	Mazama temama	M-L	Fotocolecta	C	2016	San Pedro Yólox	2	TRF
Artiodactyla	Cervidae	Mazama	temama	Mazama temama	M-L	Fotocolecta	C	2016	San Pedro Yólox	2	TRF
Artiodactyla	Cervidae	Mazama	temama	Mazama temama	M-L	Fotocolecta	C	2016	San Pedro Yólox	2	TRF
Artiodactyla	Cervidae	Mazama	temama	Mazama temama	M-L	Fotocolecta	C	2016	San Pedro Yólox	2	TRF
Artiodactyla	Cervidae	Mazama	temama	Mazama temama	M-L	Fotocolecta	C	2016	San Pedro Yólox	2	TRF
Artiodactyla	Cervidae	Mazama	temama	Mazama temama	M-L	Fotocolecta	C	2016	San Pedro Yólox	2	TRF
Artiodactyla	Cervidae	Mazama	temama	Mazama temama	M-L	Fotocolecta	C	2016	San Pedro Yólox	2	TRF
Artiodactyla	Cervidae	Mazama	temama	Mazama temama	M-L	Fotocolecta	C	2016	San Pedro Yólox	2	TRF
Artiodactyla	Cervidae	Mazama	temama	Mazama temama	M-L	Fotocolecta	C	2016	San Pedro Yólox	2	TRF
Artiodactyla	Cervidae	Mazama	temama	Mazama temama	M-L	Fotocolecta	C	2015	San Pedro Yólox	2	TRF
Artiodactyla	Cervidae	Mazama	temama	Mazama temama	M-L	Fotocolecta	C	2015	San Pedro Yólox	2	TRF
Carnivora	Procyonidae	Nasua	narica	Nasua narica	M-L	Fotocolecta	C	2016	San Pedro Yólox	2	TRF
Carnivora	Procyonidae	Nasua	narica	Nasua narica	M-L	Fotocolecta	C	2016	San Pedro Yólox	3	TRF
Carnivora	Procyonidae	Nasua	narica	Nasua narica	M-L	Fotocolecta	C	2016	San Pedro Yólox	3	TRF
Carnivora	Procyonidae	Nasua	narica	Nasua narica	M-L	Fotocolecta	C	2015	San Pedro Yólox	2	TRF
Carnivora	Procyonidae	Nasua	narica	Nasua narica	M-L	Fotocolecta	C	2015	San Pedro Yólox	2	TRF
Carnivora	Procyonidae	Nasua	narica	Nasua narica	M-L	Fotocolecta	C	2015	San Pedro Yólox	2	TRF
Carnivora	Procyonidae	Nasua	narica	Nasua narica	M-L	Fotocolecta	C	2015	San Pedro Yólox	2	TRF
Carnivora	Procyonidae	Nasua	narica	Nasua narica	M-L	Fotocolecta	C	2015	San Pedro Yólox	2	TRF
Carnivora	Procyonidae	Nasua	narica	Nasua narica	M-L	Fotocolecta	C	2015	San Pedro Yólox	2	TRF
Carnivora	Procyonidae	Nasua	narica	Nasua narica	M-L	Fotocolecta	C	2015	San Pedro Yólox	2	TRF
Carnivora	Procyonidae	Nasua	narica	Nasua narica	M-L	Fotocolecta	C	2015	San Pedro Yólox	2	TRF
Carnivora	Procyonidae	Nasua	narica	Nasua narica	M-L	Fotocolecta	C	2015	San Pedro Yólox	2	TRF
Carnivora	Procyonidae	Nasua	narica	Nasua narica	M-L	Fotocolecta	C	2015	San Pedro Yólox	2	TRF
Carnivora	Procyonidae	Nasua	narica	Nasua narica	M-L	Fotocolecta	C	2015	San Pedro Yólox	2	TRF
Carnivora	Procyonidae	Nasua	narica	Nasua narica	M-L	Fotocolecta	C	2015	San Pedro Yólox	2	TRF
Carnivora	Procyonidae	Nasua	narica	Nasua narica	M-L	Fotocolecta	C	2015	San Pedro Yólox	2	TRF
Artiodactyla	Cervidae	Ocoideleus	virginianus	Odocoileus virginianus	M-L	Fotocolecta	C	2015	San Pedro Yolox	2	TRF
Artiodactyla	Cervidae	Ocoideleus	virginianus	Odocoileus virginianus	M-L	Fotocolecta	C	2015	San Pedro Yólox	2	TRF
Carnivora	Procyonidae	Procyon	lotor	Procyon lotor	M-L	Coleccion Mastozoologica, CIIDIR-IPN Unidad Oaxaca	C	2003	Santiago Comaltepec	1	TRF
Carnivora	Felidae	Puma	concolor	Puma concolor	M-L	Fotocolecta	C	2015	San Pedro Yólox	2	TRF
Carnivora	Felidae	Puma	concolor	Puma concolor	M-L	Fotocolecta	C	2015	San Pedro Yólox	2	TRF
Carnivora	Felidae	Puma	concolor	Puma concolor	M-L	Fotocolecta	C	2015	San Pedro Yólox	2	TRF
Carnivora	Felidae	Puma	concolor	Puma concolor	M-L	Fotocolecta	C	2015	San Pedro Yólox	2	TRF
Carnivora	Felidae	Puma	concolor	Puma concolor	M-L	Fotocolecta	C	2015	San Pedro Yólox	2	TRF
Rodentia	Sciuridae	Sciurus	deppei	Sciurus deppei	M-L	Fotocolecta	C	2015	San Pedro Yólox	2	TRF
Rodentia	Sciuridae	Sciurus	deppei	Sciurus deppei	M-L	Fotocolecta	C	2015	San Pedro Yólox	2	TRF
Rodentia	Erethizontidae	Sphiggurus	mexicanus	Sphiggurus mexicanus	M-L	Fotocolecta	C	2015	San Pedro Yólox	2	TRF
Rodentia	Cuniculidae	Cuniculus	paca	Cuniculus paca	M-L	UNSIJ	C	2014	San Jose Chiltepec	1	SDTF
Rodentia	Dasyproctidae	Dasyprocta	mexicana	Dasyprocta mexicana	M-L	UNSIJ	C	2014	San Jose Chiltepec	1	SDTF
Cingulata	Dasypodidae	Dasypus	novemcintus	Dasypus novemcinctus	M-L	UNSIJ	C	2014	San Jose Chiltepec	1	SDTF
Artiodactyla	Tayassuidae	Dicotyles	angulatus	Dicotyles angulatus	M-L	UNSIJ	C	2014	San Jose Chiltepec	1	SDTF
Didelphimorphia	Didelphidae	Didelphis	Didelphis	Didelphis virginiana	M-L	UNSIJ	C	2014	San Jose Chiltepec	1	SDTF
Carnivora	Mustelidae	Eira	barbara	Eira barbara	M-L	UNSIJ	C	2014	San Jose Chiltepec	1	SDTF
Carnivora	Felidae	Leopardus	pardalis	Leopardus pardalis	M-L	UNSIJ	C	2014	San Jose Chiltepec	1	SDTF
Artiodactyla	Cervidae	Mazama	temama	Mazama temama	M-L	UNSIJ	C	2014	San Jose Chiltepec	1	SDTF
Carnivora	Mephitidae	Mephitis	macroura	Mephitis macroura	M-L	UNSIJ	C	2014	San Jose Chiltepec	1	SDTF
Carnivora	Procyonidae	Nasua	narica	Nasua narica	M-L	UNSIJ	C	2014	San Jose Chiltepec	1	SDTF
Carnivora	Procyonidae	Procyon	lotor	Procyon lotor	M-L	UNSIJ	C	2014	San Jose Chiltepec	1	SDTF
Lagomorpha	Leporidae	Sylvilagus	floridanus	Sylvilagus floridanus	M-L	UNSIJ	C	2014	San Jose Chiltepec	1	SDTF
Rodentia	Cricetidae	Habromys	chinanteco	Habromys chinanteco	S	Coleccion Mastozoologica, CIIDIR-IPN Unidad Oaxaca	C	2006	Santiago Comaltepec	4	MCF
Rodentia	Cricetidae	Peromyscus	ND	ND	S	Coleccion Mastozoologica, CIIDIR-IPN Unidad Oaxaca	C	2007	Santiago Comaltepec	3	MCF
Rodentia	Cricetidae	Peromyscus	melanocarpus	Peromyscus melanocarpus	S	Coleccion Mastozoologica, CIIDIR-IPN Unidad Oaxaca	C	2006	Santiago Comaltepec	3	MCF
Rodentia	Cricetidae	Peromyscus	melanocarpus	Peromyscus melanocarpus	S	Coleccion Mastozoologica, CIIDIR-IPN Unidad Oaxaca	C	2007	Santiago Comaltepec	3	MCF
Rodentia	Cricetidae	Peromyscus	melanocarpus	Peromyscus melanocarpus	S	Coleccion Mastozoologica, CIIDIR-IPN Unidad Oaxaca	C	2007	Santiago Comaltepec	3	MCF
Rodentia	Cricetidae	Peromyscus	melanocarpus	Peromyscus melanocarpus	S	Coleccion Mastozoologica, CIIDIR-IPN Unidad Oaxaca	C	2009	Santiago Comaltepec	3	MCF
Rodentia	Cricetidae	Peromyscus	melanocarpus	Peromyscus melanocarpus	S	UNSIJ	C	2015	Santiago Comaltepec	3	MCF
Rodentia	Cricetidae	Peromyscus	mexicanus	Peromyscus mexicanus	S	Coleccion Mastozoologica, CIIDIR-IPN Unidad Oaxaca	C	2004	Santiago Comaltepec	2	MCF
Rodentia	Cricetidae	Peromyscus	mexicanus	Peromyscus mexicanus	S	UNSIJ	C	2015	Santiago Comaltepec	3	MCF
Rodentia	Cricetidae	Reithrodontomys	mexicanus	Reithrodontomys mexicanus	S	UNSIJ	C	2015	Santiago Comaltepec	3	MCF
Soricomorpha	Soricidae	Cryptotis	mexicana	Cryptotis mexicana	S	Coleccion Mastozoologica, CIIDIR-IPN Unidad Oaxaca	C	2009	Santiago Comaltepec	4	P-OF
Soricomorpha	Soricidae	Cryptotis	parva	Cryptotis parva	S	Coleccion Mastozoologica, CIIDIR-IPN Unidad Oaxaca	C	2009	Santiago Comaltepec	4	P-OF
Soricomorpha	Soricidae	Cryptotis	parva	Cryptotis parva	S	Coleccion Mastozoologica, CIIDIR-IPN Unidad Oaxaca	C	2009	Santiago Comaltepec	4	P-OF
Soricomorpha	Soricidae	Cryptotis	parva	Cryptotis parva	S	Coleccion Mastozoologica, CIIDIR-IPN Unidad Oaxaca	C	2009	Santiago Comaltepec	4	P-OF
Rodentia	Cricetidae	Habromys	chinanteco	Habromys chinanteco	S	Coleccion Mastozoologica, CIIDIR-IPN Unidad Oaxaca	C	2005	Santiago Comaltepec	4	P-OF
Rodentia	Cricetidae	Habromys	chinanteco	Habromys chinanteco	S	Coleccion Mastozoologica, CIIDIR-IPN Unidad Oaxaca	C	2006	Santiago Comaltepec	4	P-OF
Rodentia	Cricetidae	Habromys	ixtlani	Habromys ixtlani	S	Coleccion Mastozoologica, CIIDIR-IPN Unidad Oaxaca	C	2005	Santiago Comaltepec	4	P-OF
Rodentia	Cricetidae	Habromys	ixtlani	Habromys ixtlani	S	Coleccion Mastozoologica, CIIDIR-IPN Unidad Oaxaca	C	2005	Santiago Comaltepec	4	P-OF
Rodentia	Cricetidae	Habromys	ixtlani	Habromys ixtlani	S	Coleccion Mastozoologica, CIIDIR-IPN Unidad Oaxaca	C	2006	Santiago Comaltepec	4	P-OF
Rodentia	Cricetidae	Handleyomys	chapmani	Handleyomys chapmani	S	Coleccion Mastozoologica, CIIDIR-IPN Unidad Oaxaca	C	2005	Santiago Comaltepec	4	P-OF
Rodentia	Cricetidae	Handleyomys	chapmani	Handleyomys chapmani	S	Coleccion Mastozoologica, CIIDIR-IPN Unidad Oaxaca	C	2005	Santiago Comaltepec	4	P-OF
Rodentia	Cricetidae	Handleyomys	chapmani	Handleyomys chapmani	S	Garcia_2018	C	2018	San Pedro Yolox	3	P-OF
Rodentia	Heteromyidae	Heteromys	irroratus	Heteromys irroratus	S	Coleccion Mastozoologica, CIIDIR-IPN Unidad Oaxaca	C	2009	Santiago Comaltepec	4	P-OF
Rodentia	Heteromyidae	Heteromys	irroratus	Heteromys irroratus	S	Coleccion Mastozoologica, CIIDIR-IPN Unidad Oaxaca	C	2009	Santiago Comaltepec	4	P-OF
Rodentia	Heteromyidae	Heteromys	irroratus	Heteromys irroratus	S	Garcia_2018	C	2018	San Pedro Yolox	3	P-OF
Didelphimorphia	Didelphidae	Marmosa	mexicana	Marmosa mexicana	S	Coleccion Mastozoologica, CIIDIR-IPN Unidad Oaxaca	C	2005	Santiago Comaltepec	4	P-OF
Rodentia	Cricetidae	Megadontomys	cryophilus	Megadontomys cryophilus	S	Coleccion Mastozoologica, CIIDIR-IPN Unidad Oaxaca	C	1999	Santiago Comaltepec	3	P-OF
Rodentia	Cricetidae	Megadontomys	cryophilus	Megadontomys cryophilus	S	Coleccion Mastozoologica, CIIDIR-IPN Unidad Oaxaca	C	1999	Santiago Comaltepec	4	P-OF
Rodentia	Cricetidae	Megadontomys	cryophilus	Megadontomys cryophilus	S	Coleccion Mastozoologica, CIIDIR-IPN Unidad Oaxaca	C	2005	Santiago Comaltepec	4	P-OF
Rodentia	Cricetidae	Megadontomys	cryophilus	Megadontomys cryophilus	S	Coleccion Mastozoologica, CIIDIR-IPN Unidad Oaxaca	C	2005	Santiago Comaltepec	4	P-OF
Rodentia	Cricetidae	Megadontomys	cryophilus	Megadontomys cryophilus	S	Coleccion Mastozoologica, CIIDIR-IPN Unidad Oaxaca	C	2006	Santiago Comaltepec	4	P-OF
Rodentia	Cricetidae	Microtus	mexicanus	Microtus mexicanus	S	Coleccion Mastozoologica, CIIDIR-IPN Unidad Oaxaca	C	1999	Santiago Comaltepec	3	P-OF
Rodentia	Cricetidae	Microtus	oaxacensis	Microtus oaxacensis	S	Coleccion Mastozoologica, CIIDIR-IPN Unidad Oaxaca	C	2005	Santiago Comaltepec	4	P-OF
Rodentia	Cricetidae	Microtus	oaxacensis	Microtus oaxacensis	S	Coleccion Mastozoologica, CIIDIR-IPN Unidad Oaxaca	C	2006	Santiago Comaltepec	4	P-OF
Rodentia	Cricetidae	Peromyscus	ND	ND	S	Coleccion Mastozoologica, CIIDIR-IPN Unidad Oaxaca	C	2004	Santiago Comaltepec	3	P-OF
Rodentia	Cricetidae	Peromyscus	ND	ND	S	Coleccion Mastozoologica, CIIDIR-IPN Unidad Oaxaca	C	2006	Santiago Comaltepec	4	P-OF
Soricomorpha	Soricidae	Cryptotis	ND	ND	S	Coleccion Mastozoologica, CIIDIR-IPN Unidad Oaxaca	C	2006	Santiago Comaltepec	4	P-OF
Soricomorpha	Soricidae	Sorex	ND	ND	S	Coleccion Mastozoologica, CIIDIR-IPN Unidad Oaxaca	C	2009	Santiago Comaltepec	4	P-OF
Rodentia	Cricetidae	Peromyscus	aztecus	Peromyscus aztecus	S	Coleccion Mastozoologica, CIIDIR-IPN Unidad Oaxaca	C	1999	Santiago Comaltepec	3	P-OF
Rodentia	Cricetidae	Peromyscus	aztecus	Peromyscus aztecus	S	Coleccion Mastozoologica, CIIDIR-IPN Unidad Oaxaca	C	2005	Santiago Comaltepec	4	P-OF
Rodentia	Cricetidae	Peromyscus	aztecus	Peromyscus aztecus	S	Coleccion Mastozoologica, CIIDIR-IPN Unidad Oaxaca	C	2006	Santiago Comaltepec	4	P-OF
Rodentia	Cricetidae	Peromyscus	aztecus	Peromyscus aztecus	S	Garcia_2018	C	2018	San Pedro Yolox	3	P-OF
Rodentia	Cricetidae	Peromyscus	beatae	Peromyscus beatae	S	Garcia_2018	C	2018	San Pedro Yolox	3	P-OF
Rodentia	Cricetidae	Peromyscus	gratus	Peromyscus gratus	S	Coleccion Mastozoologica, CIIDIR-IPN Unidad Oaxaca	C	1999	Santiago Comaltepec	4	P-OF
Rodentia	Cricetidae	Peromyscus	gratus	Peromyscus gratus	S	Coleccion Mastozoologica, CIIDIR-IPN Unidad Oaxaca	C	2005	Santiago Comaltepec	4	P-OF
Rodentia	Cricetidae	Peromyscus	gratus	Peromyscus gratus	S	Coleccion Mastozoologica, CIIDIR-IPN Unidad Oaxaca	C	2005	Santiago Comaltepec	4	P-OF
Rodentia	Cricetidae	Peromyscus	gratus	Peromyscus gratus	S	Coleccion Mastozoologica, CIIDIR-IPN Unidad Oaxaca	C	2006	Santiago Comaltepec	4	P-OF
Rodentia	Cricetidae	Peromyscus	levipes	Peromyscus levipes	S	Coleccion Mastozoologica, CIIDIR-IPN Unidad Oaxaca	C	2005	Santiago Comaltepec	4	P-OF
Rodentia	Cricetidae	Peromyscus	melanocarpus	Peromyscus melanocarpus	S	Coleccion Mastozoologica, CIIDIR-IPN Unidad Oaxaca	C	1999	Santiago Comaltepec	3	P-OF
Rodentia	Cricetidae	Peromyscus	melanocarpus	Peromyscus melanocarpus	S	Coleccion Mastozoologica, CIIDIR-IPN Unidad Oaxaca	C	1999	Santiago Comaltepec	3	P-OF
Rodentia	Cricetidae	Peromyscus	melanocarpus	Peromyscus melanocarpus	S	Coleccion Mastozoologica, CIIDIR-IPN Unidad Oaxaca	C	1999	Santiago Comaltepec	4	P-OF
Rodentia	Cricetidae	Peromyscus	melanocarpus	Peromyscus melanocarpus	S	Coleccion Mastozoologica, CIIDIR-IPN Unidad Oaxaca	C	2005	Santiago Comaltepec	4	P-OF
Rodentia	Cricetidae	Peromyscus	melanocarpus	Peromyscus melanocarpus	S	Coleccion Mastozoologica, CIIDIR-IPN Unidad Oaxaca	C	2005	Santiago Comaltepec	4	P-OF
Rodentia	Cricetidae	Peromyscus	melanocarpus	Peromyscus melanocarpus	S	Coleccion Mastozoologica, CIIDIR-IPN Unidad Oaxaca	C	2005	Santiago Comaltepec	4	P-OF
Rodentia	Cricetidae	Peromyscus	melanocarpus	Peromyscus melanocarpus	S	Coleccion Mastozoologica, CIIDIR-IPN Unidad Oaxaca	C	2006	Santiago Comaltepec	4	P-OF
Rodentia	Cricetidae	Peromyscus	melanocarpus	Peromyscus melanocarpus	S	Coleccion Mastozoologica, CIIDIR-IPN Unidad Oaxaca	C	2006	Santiago Comaltepec	4	P-OF
Rodentia	Cricetidae	Peromyscus	mexicanus	Peromyscus mexicanus	S	Coleccion Mastozoologica, CIIDIR-IPN Unidad Oaxaca	C	2004	Santiago Comaltepec	3	P-OF
Rodentia	Cricetidae	Reithrodontomys	mexicanus	Reithrodontomys mexicanus	S	Coleccion Mastozoologica, CIIDIR-IPN Unidad Oaxaca	C	1999	Santiago Comaltepec	4	P-OF
Rodentia	Cricetidae	Reithrodontomys	mexicanus	Reithrodontomys mexicanus	S	Coleccion Mastozoologica, CIIDIR-IPN Unidad Oaxaca	C	2005	Santiago Comaltepec	4	P-OF
Rodentia	Cricetidae	Reithrodontomys	mexicanus	Reithrodontomys mexicanus	S	Coleccion Mastozoologica, CIIDIR-IPN Unidad Oaxaca	C	2005	Santiago Comaltepec	4	P-OF
Rodentia	Cricetidae	Reithrodontomys	mexicanus	Reithrodontomys mexicanus	S	Coleccion Mastozoologica, CIIDIR-IPN Unidad Oaxaca	C	2005	Santiago Comaltepec	4	P-OF
Rodentia	Cricetidae	Reithrodontomys	mexicanus	Reithrodontomys mexicanus	S	Coleccion Mastozoologica, CIIDIR-IPN Unidad Oaxaca	C	2006	Santiago Comaltepec	4	P-OF
Rodentia	Cricetidae	Reithrodontomys	microdon	Reithrodontomys microdon	S	Garcia_2018	C	2018	San Pedro Yolox	3	P-OF
Rodentia	Cricetidae	Reithrodontomys	sumichrasti	Reithrodontomys sumichrasti	S	Coleccion Mastozoologica, CIIDIR-IPN Unidad Oaxaca	C	1999	Santiago Comaltepec	4	P-OF
Soricomorpha	Soricidae	Sorex	veraecrucis	Sorex veraecrucis	S	Coleccion Mastozoologica, CIIDIR-IPN Unidad Oaxaca	C	1993	San Juan Quiotepec	3	P-OF
Soricomorpha	Soricidae	Sorex	veraepacis	Sorex veraepacis	S	Coleccion Mastozoologica, CIIDIR-IPN Unidad Oaxaca	C	2005	Santiago Comaltepec	4	P-OF
Rodentia	Heteromyidae	Heteromys	desmarestianus	Heteromys desmarestianus	S	Coleccion Mastozoologica, CIIDIR-IPN Unidad Oaxaca	C	2004	Santiago Comaltepec	1	TRF
Rodentia	Cricetidae	Peromyscus	ND	ND	S	Coleccion Mastozoologica, CIIDIR-IPN Unidad Oaxaca	C	2004	Santiago Comaltepec	1	TRF
Rodentia	Cricetidae	Sigmodon	ND	ND	S	Coleccion Mastozoologica, CIIDIR-IPN Unidad Oaxaca	C	2004	Santiago Comaltepec	1	TRF
Rodentia	Cricetidae	Oligoryzomys	fulvescens	Oligoryzomys fulvescens	S	Coleccion Mastozoologica, CIIDIR-IPN Unidad Oaxaca	C	2004	Santiago Comaltepec	1	TRF
Rodentia	Cricetidae	Peromyscus	mexicanus	Peromyscus mexicanus	S	Coleccion Mastozoologica, CIIDIR-IPN Unidad Oaxaca	C	2004	Santiago Comaltepec	1	TRF
Rodentia	Cricetidae	Handleyomys	chapmani	Handleyomys chapmani	S	Garcia_2018	C	2018	San Pedro Yolox	3	A
Rodentia	Heteromyidae	Heteromys	irroratus	Heteromys irroratus	S	Garcia_2018	C	2018	San Pedro Yolox	3	A
Rodentia	Cricetidae	Peromyscus	aztecus	Peromyscus aztecus	S	Garcia_2018	C	2018	San Pedro Yolox	3	A
Rodentia	Cricetidae	Peromyscus	beatae	Peromyscus beatae	S	Garcia_2018	C	2018	San Pedro Yolox	3	A
Rodentia	Cricetidae	Reithrodontomys	microdon	Reithrodontomys microdon	S	Garcia_2018	C	2018	San Pedro Yolox	3	A
Rodentia	Cricetidae	Peromyscus	ND	ND	S	Coleccion Mastozoologica, CIIDIR-IPN Unidad Oaxaca	C	2004	Santiago Comaltepec	4	ND
Chiroptera	Phyllostomidae	Artibeus	lituratus	Artibeus lituratus	B	Coleccion Mastozoologica, CIIDIR-IPN Unidad Oaxaca	C	2009	Santiago Comaltepec	3	MCF
Chiroptera	Phyllostomidae	Dermanura	phaeotis	Dermanura phaeotis	B	Coleccion Mastozoologica, CIIDIR-IPN Unidad Oaxaca	C	2009	Santiago Comaltepec	3	MCF
Chiroptera	Phyllostomidae	Sturnira	hondurensis	Sturnira hondurensis	B	Coleccion Mastozoologica, CIIDIR-IPN Unidad Oaxaca	C	2009	Santiago Comaltepec	3	MCF
Chiroptera	Phyllostomidae	Sturnira	parvidens	Sturnira parvidens	B	Coleccion Mastozoologica, CIIDIR-IPN Unidad Oaxaca	C	2009	Santiago Comaltepec	3	MCF
Chiroptera	Phyllostomidae	Anoura	geoffroyi	Anoura geoffroyi	B	Coleccion Mastozoologica, CIIDIR-IPN Unidad Oaxaca	C	2009	Santiago Comaltepec	4	P-OF
Chiroptera	Phyllostomidae	Artibeus	jamaicensis	Artibeus jamaicensis	B	Coleccion Mastozoologica, CIIDIR-IPN Unidad Oaxaca	C	2009	Santiago Comaltepec	4	P-OF
Chiroptera	Phyllostomidae	Artibeus	jamaicensis	Artibeus jamaicensis	B	Coleccion Mastozoologica, CIIDIR-IPN Unidad Oaxaca	C	2009	Santiago Comaltepec	4	P-OF
Chiroptera	Phyllostomidae	Artibeus	jamaicensis	Artibeus jamaicensis	B	Coleccion Mastozoologica, CIIDIR-IPN Unidad Oaxaca	C	2009	Santiago Comaltepec	4	P-OF
Chiroptera	Phyllostomidae	Artibeus	jamaicensis	Artibeus jamaicensis	B	Coleccion Mastozoologica, CIIDIR-IPN Unidad Oaxaca	C	2009	Santiago Comaltepec	4	P-OF
Chiroptera	Emballonuridae	Balantiopteryx	plicata	Balantiopteryx plicata	B	Coleccion Mastozoologica, CIIDIR-IPN Unidad Oaxaca	C	2009	Santiago Comaltepec	4	P-OF
Chiroptera	Phyllostomidae	Carollia	subrufa	Carollia subrufa	B	Coleccion Mastozoologica, CIIDIR-IPN Unidad Oaxaca	C	2009	Santiago Comaltepec	4	P-OF
Chiroptera	Phyllostomidae	Carollia	subrufa	Carollia subrufa	B	Coleccion Mastozoologica, CIIDIR-IPN Unidad Oaxaca	C	2009	Santiago Comaltepec	4	P-OF
Chiroptera	Phyllostomidae	Carollia	subrufa	Carollia subrufa	B	Coleccion Mastozoologica, CIIDIR-IPN Unidad Oaxaca	C	2009	Santiago Comaltepec	4	P-OF
Chiroptera	Phyllostomidae	Centurio	senex	Centurio senex	B	Coleccion Mastozoologica, CIIDIR-IPN Unidad Oaxaca	C	2006	Santiago Comaltepec	4	P-OF
Chiroptera	Phyllostomidae	Choeroniscus	godmani	Choeroniscus godmani	B	Coleccion Mastozoologica, CIIDIR-IPN Unidad Oaxaca	C	2009	Santiago Comaltepec	4	P-OF
Chiroptera	Phyllostomidae	Choeroniscus	godmani	Choeroniscus godmani	B	Coleccion Mastozoologica, CIIDIR-IPN Unidad Oaxaca	C	2009	Santiago Comaltepec	4	P-OF
Chiroptera	Phyllostomidae	Desmodus	rotundus	Desmodus rotundus	B	Coleccion Mastozoologica, CIIDIR-IPN Unidad Oaxaca	C	2006	Santiago Comaltepec	4	P-OF
Chiroptera	Phyllostomidae	Desmodus	rotundus	Desmodus rotundus	B	Coleccion Mastozoologica, CIIDIR-IPN Unidad Oaxaca	C	2009	Santiago Comaltepec	4	P-OF
Chiroptera	Phyllostomidae	Glossophaga	commissarisi	Glossophaga commissarisi	B	Coleccion Mastozoologica, CIIDIR-IPN Unidad Oaxaca	C	2009	Santiago Comaltepec	4	P-OF
Chiroptera	Phyllostomidae	Glossophaga	leachii	Glossophaga leachii	B	Coleccion Mastozoologica, CIIDIR-IPN Unidad Oaxaca	C	2009	Santiago Comaltepec	4	P-OF
Chiroptera	Phyllostomidae	Glossophaga	leachii	Glossophaga leachii	B	Coleccion Mastozoologica, CIIDIR-IPN Unidad Oaxaca	C	2009	Santiago Comaltepec	4	P-OF
Chiroptera	Phyllostomidae	Glossophaga	morenoi	Glossophaga morenoi	B	Coleccion Mastozoologica, CIIDIR-IPN Unidad Oaxaca	C	2009	Santiago Comaltepec	4	P-OF
Chiroptera	Phyllostomidae	Glossophaga	morenoi	Glossophaga morenoi	B	Coleccion Mastozoologica, CIIDIR-IPN Unidad Oaxaca	C	2009	Santiago Comaltepec	4	P-OF
Chiroptera	Phyllostomidae	Glossophaga	morenoi	Glossophaga morenoi	B	Coleccion Mastozoologica, CIIDIR-IPN Unidad Oaxaca	C	2009	Santiago Comaltepec	4	P-OF
Chiroptera	Phyllostomidae	Glossophaga	morenoi	Glossophaga morenoi	B	Coleccion Mastozoologica, CIIDIR-IPN Unidad Oaxaca	C	2009	Santiago Comaltepec	4	P-OF
Chiroptera	Phyllostomidae	Glossophaga	soricina	Glossophaga soricina	B	Coleccion Mastozoologica, CIIDIR-IPN Unidad Oaxaca	C	2009	Santiago Comaltepec	4	P-OF
Chiroptera	Phyllostomidae	Glossophaga	soricina	Glossophaga soricina	B	Coleccion Mastozoologica, CIIDIR-IPN Unidad Oaxaca	C	2009	Santiago Comaltepec	4	P-OF
Chiroptera	Vespertilionidae	Lasiurus	cinereus	Lasiurus cinereus	B	Coleccion Mastozoologica, CIIDIR-IPN Unidad Oaxaca	C	1999	Santiago Comaltepec	3	P-OF
Chiroptera	Phyllostomidae	Leptonycteris	yerbabuenae	Leptonycteris yerbabuenae	B	Coleccion Mastozoologica, CIIDIR-IPN Unidad Oaxaca	C	2009	Santiago Comaltepec	4	P-OF
Chiroptera	Mormoopidae	Pteronotus	parnellii	Pteronotus parnellii	B	Coleccion Mastozoologica, CIIDIR-IPN Unidad Oaxaca	C	2009	Santiago Comaltepec	4	P-OF
Chiroptera	Mormoopidae	Pteronotus	parnellii	Pteronotus parnellii	B	Coleccion Mastozoologica, CIIDIR-IPN Unidad Oaxaca	C	2009	Santiago Comaltepec	4	P-OF
Chiroptera	Emballonuridae	Saccopteryx	bilineata	Saccopteryx bilineata	B	Coleccion Mastozoologica, CIIDIR-IPN Unidad Oaxaca	C	2009	Santiago Comaltepec	4	P-OF
Chiroptera	Phyllostomidae	Sturnira	hondurensis	Sturnira hondurensis	B	Coleccion Mastozoologica, CIIDIR-IPN Unidad Oaxaca	C	2009	Santiago Comaltepec	4	P-OF
Chiroptera	Phyllostomidae	Sturnira	hondurensis	Sturnira hondurensis	B	Coleccion Mastozoologica, CIIDIR-IPN Unidad Oaxaca	C	2009	Santiago Comaltepec	4	P-OF
Chiroptera	Phyllostomidae	Sturnira	hondurensis	Sturnira hondurensis	B	Coleccion Mastozoologica, CIIDIR-IPN Unidad Oaxaca	C	2009	Santiago Comaltepec	4	P-OF
Chiroptera	Phyllostomidae	Sturnira	hondurensis	Sturnira hondurensis	B	Coleccion Mastozoologica, CIIDIR-IPN Unidad Oaxaca	C	2009	Santiago Comaltepec	4	P-OF
Chiroptera	Phyllostomidae	Sturnira	hondurensis	Sturnira hondurensis	B	Coleccion Mastozoologica, CIIDIR-IPN Unidad Oaxaca	C	2009	Santiago Comaltepec	4	P-OF
Chiroptera	Phyllostomidae	Sturnira	parvidens	Sturnira parvidens	B	Coleccion Mastozoologica, CIIDIR-IPN Unidad Oaxaca	C	2009	Santiago Comaltepec	4	P-OF
Chiroptera	Phyllostomidae	Sturnira	parvidens	Sturnira parvidens	B	Coleccion Mastozoologica, CIIDIR-IPN Unidad Oaxaca	C	2009	Santiago Comaltepec	4	P-OF
Chiroptera	Phyllostomidae	Sturnira	parvidens	Sturnira parvidens	B	Coleccion Mastozoologica, CIIDIR-IPN Unidad Oaxaca	C	2009	Santiago Comaltepec	4	P-OF
Chiroptera	Phyllostomidae	Sturnira	parvidens	Sturnira parvidens	B	Coleccion Mastozoologica, CIIDIR-IPN Unidad Oaxaca	C	2009	Santiago Comaltepec	4	P-OF
Chiroptera	Phyllostomidae	Sturnira	parvidens	Sturnira parvidens	B	Coleccion Mastozoologica, CIIDIR-IPN Unidad Oaxaca	C	2009	Santiago Comaltepec	4	P-OF
Chiroptera	Phyllostomidae	Sturnira	parvidens	Sturnira parvidens	B	Coleccion Mastozoologica, CIIDIR-IPN Unidad Oaxaca	C	2009	Santiago Comaltepec	4	P-OF
Chiroptera	Phyllostomidae	Centurio	senex	Centurio senex	B	Coleccion Mastozoologica, CIIDIR-IPN Unidad Oaxaca	C	2006	Santiago Comaltepec	1	TRF
Chiroptera	Phyllostomidae	Artibeus	jamaicensis	Artibeus jamaicensis	B	UNSIJ	C	2014	San Jose Chiltepec	1	SDTF
Chiroptera	Phyllostomidae	Carollia	perspicillata	Carollia perspicillata	B	UNSIJ	C	2014	San Jose Chiltepec	1	SDTF
Chiroptera	Phyllostomidae	Carollia	subrufa	Carollia subrufa	B	UNSIJ	C	2014	San Jose Chiltepec	1	SDTF
Chiroptera	Phyllostomidae	Centurio	senex	Centurio senex	B	UNSIJ	C	2014	San Jose Chiltepec	1	SDTF
Chiroptera	Phyllostomidae	Dermanura	phaotis	Dermanura phaeotis	B	UNSIJ	C	2014	San Jose Chiltepec	1	SDTF
Chiroptera	Phyllostomidae	Desmodus	rotundus	Desmodus rotundus	B	UNSIJ	C	2014	San Jose Chiltepec	1	SDTF
Chiroptera	Emballonuridae	Diclidurus	albus	Diclidurus albus	B	UNSIJ	C	2014	San Jose Chiltepec	1	SDTF
Chiroptera	Vespertilionidae	Eptesicus	furinalis	Eptesicus furinalis	B	UNSIJ	C	2014	San Jose Chiltepec	1	SDTF
Chiroptera	Phyllostomidae	Glossophaga	soricina	Glossophaga soricina	B	UNSIJ	C	2014	San Jose Chiltepec	1	SDTF
Chiroptera	Vespertilionidae	Myotis	nigricans	Myotis nigricans	B	UNSIJ	C	2014	San Jose Chiltepec	1	SDTF
Chiroptera	Emballonuridae	Saccopteryx	bilineata	Saccopteryx bilineata	B	UNSIJ	C	2014	San Jose Chiltepec	1	SDTF
Chiroptera	Phyllostomidae	Sturnira	parvidens	Sturnira parvidens	B	UNSIJ	C	2014	San Jose Chiltepec	1	SDTF
Chiroptera	Phyllostomidae	Uroderma	bilobatum	Uroderma bilobatum	B	UNSIJ	C	2014	San Jose Chiltepec	1	SDTF
Chiroptera	Phyllostomidae	Glossophaga	morenoi	Glossophaga morenoi	B	Coleccion Mastozoologica, CIIDIR-IPN Unidad Oaxaca	C	2009	Santiago Comaltepec	4	ND
Rodentia	Cuniculidae	Cuniculus	paca	Cuniculus paca	M-L	Perez et al 2006	L	2005	San Felipe Usila	2	MCF
Cingulata	Dasypodidae	Dasypus	novemcintus	Dasypus novemcinctus	M-L	Perez et al 2006	L	2005	San Felipe Usila	2	MCF
Artiodactyla	Tayassuidae	Dicotyles	angulatus	Dicotyles angulatus	M-L	Perez et al 2006	L	2005	San Felipe Usila	2	MCF
Carnivora	Felidae	Leopardus	wiedii	Leopardus wiedii	M-L	Perez et al 2006	L	2005	San Felipe Usila	2	MCF
Artiodactyla	Cervidae	Mazama	temama	Mazama temama	M-L	Perez et al 2006	L	2005	San Felipe Usila	2	MCF
Carnivora	Procyonidae	Nasua	narica	Nasua narica	M-L	Perez et al 2006	L	2005	San Felipe Usila	2	MCF
Carnivora	Felidae	Panthera	onca	Panthera onca	M-L	Perez et al 2006	L	2005	San Felipe Usila	2	MCF
Carnivora	Felidae	Puma	concolor	Puma concolor	M-L	Perez et al 2006	L	2005	San Felipe Usila	2	MCF
Rodentia	Sciuridae	Sciurus	aureogaster	Sciurus aureogaster	M-L	Perez et al 2006	L	2005	San Felipe Usila	2	MCF
Pilosa	Myrmecophagidae	Tamandua	mexicana	Tamandua mexicana	M-L	Perez et al 2006	L	2005	San Felipe Usila	2	MCF
Perissodactyla	Tapiridae	Tapirella	bairdii	Tapirella bairdii	M-L	Lira et al 2006	L	2004	Santiago Jocotepec	1	MCF
Carnivora	Canidae	Urocyon	cinereoargenteus	Urocyon cinereoargenteus	M-L	Perez et al 2006	L	2005	San Felipe Usila	2	MCF
Carnivora	Procyonidae	Bassariscus	astutus	Basariscus astutus	M-L	Rio-Garcia etal 2014	L	2010	Santiago Comaltepec	4	P-OF
Carnivora	Canidae	Canis	latrans	Canis latrans	M-L	Rio-Garcia etal 2014	L	2010	Santiago Comaltepec	4	P-OF
Carnivora	Mephitidae	Conepatus	semistriatus	Conepatus semistriatus	M-L	Rio-Garcia etal 2014	L	2010	Santiago Comaltepec	4	P-OF
Artiodactyla	Tayassuidae	Dicotyles	angulatus	Dicotyles angulatus	M-L	Rio-Garcia etal 2014	L	2010	Santiago Comaltepec	4	P-OF
Carnivora	Felidae	Lynx	rufus	Lynx rufus	M-L	Rio-Garcia etal 2014	L	2010	Santiago Comaltepec	4	P-OF
Carnivora	Felidae	Puma	yagouaroundi	Puma yagouaroundi	M-L	Rio-Garcia etal 2014	L	2010	Santiago Comaltepec	4	P-OF
Rodentia	Sciuridae	Sciurus	aureogaster	Sciurus aureogaster	M-L	Rio-Garcia etal 2014	L	2010	Santiago Comaltepec	4	P-OF
Lagomorpha	Leporidae	Sylvilagus	floridanus	Sylvilagus floridanus	M-L	Rio-Garcia etal 2014	L	2010	Santiago Comaltepec	4	P-OF
Primates	Atelidae	Ateles	geoffroyi	Ateles geoffroyi	M-L	Ortiz-Martínez et al 2012	L	2012	Santiago Jocotepec	1	TRF
Carnivora	Mephitidae	Conepatus	semistriatus	Conepatus semistriatus	M-L	Rio-Garcia etal 2014	L	2010	Santiago Comaltepec	3	TRF
Rodentia	Cuniculidae	Cuniculus	paca	Cuniculus paca	M-L	Rio-Garcia etal 2014	L	2010	Santiago Comaltepec	3	TRF
Rodentia	Dasyproctidae	Dasyprocta	mexicana	Dasyprocta mexicana	M-L	Rio-Garcia etal 2014	L	2010	Santiago Comaltepec	3	TRF
Artiodactyla	Tayassuidae	Dicotyles	angulatus	Dicotyles angulatus	M-L	Rio-Garcia etal 2014	L	2010	Santiago Comaltepec	3	TRF
Carnivora	Felidae	Leopardus	pardalis	Leopardus pardalis	M-L	Rio-Garcia etal 2014	L	2010	Santiago Comaltepec	3	TRF
Artiodactyla	Cervidae	Mazama	temama	Mazama temama	M-L	Rio-Garcia etal 2014	L	2010	Santiago Comaltepec	3	TRF
Carnivora	Felidae	Panthera	onca	Panthera onca	M-L	Rio-Garcia etal 2014	L	2010	Santiago Comaltepec	3	TRF
Carnivora	Procyonidae	Procyon	lotor	Procyon lotor	M-L	Rio-Garcia etal 2014	L	2010	Santiago Comaltepec	3	TRF
Pilosa	Myrmecophagidae	Tamandua	mexicana	Tamandua mexicana	M-L	Rio-Garcia etal 2014	L	2010	Santiago Comaltepec	3	TRF
Carnivora	Canidae	Urocyon	cinereoargenteus	Urocyon cinereoargenteus	M-L	Rio-Garcia etal 2014	L	2010	Santiago Comaltepec	3	TRF
Primates	Atelidae	Ateles	geoffroyi	Ateles geoffroyi	M-L	Alfaro et al 2006	L	2006	Santiago Jocotepec	1	SDTF
Carnivora	Mephitidae	Conepatus	mesoleucus	Conepatus leuconotus	M-L	Ibarra et al 2011	L	2011	San Felipe Usila	2	SDTF
Rodentia	Cuniculidae	Cuniculus	paca	Cuniculus paca	M-L	Alfaro et al 2006	L	2006	Santiago Jocotepec	1	SDTF
Rodentia	Cuniculidae	Cuniculus	paca	Cuniculus paca	M-L	Ibarra et al 2011	L	2011	San Felipe Usila	2	SDTF
Rodentia	Dasyproctidae	Dasyprocta	mexicana	Dasyprocta mexicana	M-L	Alfaro et al 2006	L	2006	Santiago Jocotepec	1	SDTF
Rodentia	Dasyproctidae	Dasyprocta	mexicana	Dasyprocta mexicana	M-L	Ibarra et al 2011	L	2011	San Felipe Usila	2	SDTF
Cingulata	Dasypodidae	Dasypus	novemcintus	Dasypus novemcinctus	M-L	Alfaro et al 2006	L	2006	Santiago Jocotepec	1	SDTF
Cingulata	Dasypodidae	Dasypus	novemcintus	Dasypus novemcinctus	M-L	Ibarra et al 2011	L	2011	San Felipe Usila	2	SDTF
Artiodactyla	Tayassuidae	Dicotyles	angulatus	Dicotyles angulatus	M-L	Alfaro et al 2006	L	2006	Santiago Jocotepec	1	SDTF
Artiodactyla	Tayassuidae	Dicotyles	angulatus	Dicotyles angulatus	M-L	Ibarra et al 2011	L	2011	San Felipe Usila	2	SDTF
Didelphimorphia	Didelphidae	Didelphis	marsupialis	Didelphis marsupialis	M-L	Alfaro et al 2006	L	2006	Santiago Jocotepec	1	SDTF
Didelphimorphia	Didelphidae	Didelphis	marsupialis	Didelphis marsupialis	M-L	Ibarra et al 2011	L	2011	San Felipe Usila	2	SDTF
Didelphimorphia	Didelphidae	Didelphis	virginiana	Didelphis virginiana	M-L	Ibarra et al 2011	L	2011	San Felipe Usila	2	SDTF
Carnivora	Mustelidae	Eira	barbara	Eira barbara	M-L	Ibarra et al 2011	L	2011	San Felipe Usila	2	SDTF
Carnivora	Felidae	Leopardus	pardalis	Leopardus pardalis	M-L	Ibarra et al 2011	L	2011	San Felipe Usila	2	SDTF
Carnivora	Felidae	Leopardus	wiedii	Leopardus wiedii	M-L	Ibarra et al 2011	L	2011	San Felipe Usila	2	SDTF
Artiodactyla	Cervidae	Mazama	temama	Mazama temama	M-L	Alfaro et al 2006	L	2006	Santiago Jocotepec	1	SDTF
Artiodactyla	Cervidae	Mazama	temama	Mazama temama	M-L	Ibarra et al 2011	L	2011	San Felipe Usila	2	SDTF
Carnivora	Procyonidae	Nasua	narica	Nasua narica	M-L	Alfaro et al 2006	L	2006	Santiago Jocotepec	1	SDTF
Carnivora	Procyonidae	Nasua	narica	Nasua narica	M-L	Ibarra et al 2011	L	2011	San Felipe Usila	2	SDTF
Rodentia	Geomyidae	Orthogeomys	hispidus	Orthogeomys hispidus	M-L	Ibarra et al 2011	L	2011	San Felipe Usila	2	SDTF
Carnivora	Felidae	Panthera	onca	Panthera onca	M-L	Alfaro et al 2006	L	2006	Santiago Jocotepec	1	SDTF
Carnivora	Felidae	Panthera	onca	Panthera onca	M-L	Ibarra et al 2011	L	2011	San Felipe Usila	2	SDTF
Carnivora	Procyonidae	Potos	flavus	Potos flavus	M-L	Alfaro et al 2006	L	2006	Santiago Jocotepec	1	SDTF
Carnivora	Procyonidae	Procyon	lotor	Procyon lotor	M-L	Alfaro et al 2006	L	2006	Santiago Jocotepec	1	SDTF
Carnivora	Procyonidae	Procyon	lotor	Procyon lotor	M-L	Ibarra et al 2011	L	2011	San Felipe Usila	2	SDTF
Rodentia	Sciuridae	Sciurus	aureogaster	Sciurus aureogaster	M-L	Alfaro et al 2006	L	2006	Santiago Jocotepec	1	SDTF
Rodentia	Erethizontidae	Sphiggurus	mexicanus	Sphiggurus mexicanus	M-L	Ibarra et al 2011	L	2011	San Felipe Usila	2	SDTF
Pilosa	Myrmecophagidae	Tamandua	mexicana	Tamandua mexicana	M-L	Ibarra et al 2011	L	2011	San Felipe Usila	2	SDTF
Rodentia	Cricetidae	Handleyomys	chapmani	Handleyomys chapmani	S	Perez et al 2006	L	2005	San Felipe Usila	2	MCF
Rodentia	Cricetidae	Oligoryzomys	fulvescens	Oligoryzomys fulvescens	S	Perez et al 2006	L	2005	San Felipe Usila	2	MCF
Rodentia	Cricetidae	Peromyscus	aztecus	Peromyscus aztecus	S	Perez et al 2006	L	2005	San Felipe Usila	2	MCF
Rodentia	Cricetidae	Peromyscus	mexicanus	Peromyscus mexicanus	S	Perez et al 2006	L	2005	San Felipe Usila	2	MCF
Rodentia	Cricetidae	Handleyomys	chapmani	Handleyomys chapmani	S	Alfaro et al 2006	L	2006	Santiago Jocotepec	1	SDTF
Rodentia	Heteromyidae	Heteromys	desmarestianus	Heteromys desmarestianus	S	Alfaro et al 2006	L	2006	Santiago Jocotepec	1	SDTF
Rodentia	Heteromyidae	Heteromys	irroratus	Heteromys irroratus	S	Alfaro et al 2006	L	2006	Santiago Jocotepec	1	SDTF
Rodentia	Cricetidae	Peromyscus	mexicanus	Peromyscus mexicanus	S	Alfaro et al 2006	L	2006	Santiago Jocotepec	1	SDTF
Rodentia	Cricetidae	Sigmodon	hispidus	Sigmodon hispidus	S	Alfaro et al 2006	L	2006	Santiago Jocotepec	1	SDTF
Rodentia	Cricetidae	Tylomys	nudicaudus	Tylomys nudicaudus	S	Alfaro et al 2006	L	2006	Santiago Jocotepec	1	SDTF
Chiroptera	Phyllostomidae	Anoura	geoffroyi	Anoura geoffroyi	B	Perez et al 2006	L	2005	San Felipe Usila	2	MCF
Chiroptera	Phyllostomidae	Artibeus	jamaicensis	Artibeus jamaicensis	B	Perez et al 2006	L	2005	San Felipe Usila	2	MCF
Chiroptera	Phyllostomidae	Carollia	sowelli	Carollia sowelli	B	Perez et al 2006	L	2005	San Felipe Usila	2	MCF
Chiroptera	Phyllostomidae	Dermanura	toltecus	Dermanura tolteca	B	Perez et al 2006	L	2005	San Felipe Usila	2	MCF
Chiroptera	Phyllostomidae	Enchisthenes	hartii	Enchisthenes hartii	B	Perez et al 2006	L	2005	San Felipe Usila	2	MCF
Chiroptera	Phyllostomidae	Phyllostomus	discolor	Phyllostomus discolor	B	Perez et al 2006	L	2005	San Felipe Usila	2	MCF
Chiroptera	Phyllostomidae	Sturnira	hondurensis	Sturnira hondurensis	B	Perez et al 2006	L	2005	San Felipe Usila	2	MCF
Chiroptera	Phyllostomidae	Artibeus	jamaicensis	Artibeus jamaicensis	B	Alfaro et al 2006	L	2006	Santiago Jocotepec	1	SDTF
Chiroptera	Emballonuridae	Balantiopteryx	io	Balantiopteryx io	B	Alfaro et al 2006	L	2006	Santiago Jocotepec	1	SDTF
Chiroptera	Emballonuridae	Balantiopteryx	plicata	Balantiopteryx plicata	B	Alfaro et al 2006	L	2006	Santiago Jocotepec	1	SDTF
Chiroptera	Phyllostomidae	Carollia	sowelli	Carollia sowelli	B	Alfaro et al 2006	L	2006	Santiago Jocotepec	1	SDTF
Chiroptera	Phyllostomidae	Centurio	senex	Centurio senex	B	Alfaro et al 2006	L	2006	Santiago Jocotepec	1	SDTF
Chiroptera	Phyllostomidae	Dermanura	toltecus	Dermanura tolteca	B	Alfaro et al 2006	L	2006	Santiago Jocotepec	1	SDTF
Chiroptera	Phyllostomidae	Desmodus	rotundus	Desmodus rotundus	B	Alfaro et al 2006	L	2006	Santiago Jocotepec	1	SDTF
Chiroptera	Phyllostomidae	Enchisthenes	hartii	Enchisthenes hartii	B	Alfaro et al 2006	L	2006	Santiago Jocotepec	1	SDTF
Chiroptera	Phyllostomidae	Glossophaga	soricina	Glossophaga soricina	B	Alfaro et al 2006	L	2006	Santiago Jocotepec	1	SDTF
Chiroptera	Phyllostomidae	Mimon	cozumelae	Mimon cozumelae	B	Alfaro et al 2006	L	2006	Santiago Jocotepec	1	SDTF
Chiroptera	Phyllostomidae	Sturnira	parvidens	Sturnira parvidens	B	Alfaro et al 2006	L	2006	Santiago Jocotepec	1	SDTF
Chiroptera	Phyllostomidae	Vampiressa	thyone	Vampyressa thyone	B	Alfaro et al 2006	L	2006	Santiago Jocotepec	1	SDTF
Chiroptera	Phyllostomidae	Vampyrodes	major	Vampyrodes major	B	Alfaro et al 2006	L	2006	Santiago Jocotepec	1	SDTF
Chiroptera	Phyllostomidae	Vampyrum	spectrum	Vampyrum spectrum	B	Alfaro et al 2006	L	2006	Santiago Jocotepec	1	SDTF
Carnivora	Procyonidae	Bassariscus	sumichrasti	Bassariscus sumichrasti	M-L	Fotocolecta CONANP	CM	2014	San Felipe Usila	3	MCF
Carnivora	Procyonidae	Bassariscus	sumichrasti	Bassariscus sumichrasti	M-L	Fotocolecta CONANP	CM	2014	San Felipe Usila	3	MCF
Carnivora	Procyonidae	Bassariscus	sumichrasti	Bassariscus sumichrasti	M-L	Fotocolecta CONANP	CM	2014	San Felipe Usila	3	MCF
Rodentia	Cuniculidae	Cuniculus	paca	Cuniculus paca	M-L	Fotocolecta CONANP	CM	2014	San Felipe Usila	3	MCF
Rodentia	Cuniculidae	Cuniculus	paca	Cuniculus paca	M-L	Fotocolecta CONANP	CM	2014	San Felipe Usila	3	MCF
Rodentia	Cuniculidae	Cuniculus	paca	Cuniculus paca	M-L	Fotocolecta CONANP	CM	2014	San Felipe Usila	3	MCF
Cingulata	Dasypodidae	Dasypus	novemcintus	Dasypus novemcinctus	M-L	Fotocolecta CONANP	CM	2014	San Felipe Usila	3	MCF
Cingulata	Dasypodidae	Dasypus	novemcintus	Dasypus novemcinctus	M-L	Video CONANP	CM	2014	San Felipe Usila	2	MCF
Artiodactyla	Tayassuidae	Dicotyles	angulatus	Dicotyles angulatus	M-L	Fotocolecta CONANP	CM	2014	San Felipe Usila	3	MCF
Artiodactyla	Tayassuidae	Dicotyles	angulatus	Dicotyles angulatus	M-L	Fotocolecta CONANP	CM	2014	San Felipe Usila	3	MCF
Artiodactyla	Tayassuidae	Dicotyles	angulatus	Dicotyles angulatus	M-L	Video CONANP	CM	2014	San Felipe Usila	2	MCF
Artiodactyla	Tayassuidae	Dicotyles	angulatus	Dicotyles angulatus	M-L	Video CONANP	CM	2014	San Felipe Usila	2	MCF
Artiodactyla	Tayassuidae	Dicotyles	angulatus	Dicotyles angulatus	M-L	Video CONANP	CM	2014	San Felipe Usila	2	MCF
Artiodactyla	Tayassuidae	Dicotyles	angulatus	Dicotyles angulatus	M-L	Video CONANP	CM	2014	San Felipe Usila	2	MCF
Artiodactyla	Tayassuidae	Dicotyles	angulatus	Dicotyles angulatus	M-L	Video CONANP	CM	2014	San Felipe Usila	2	MCF
Artiodactyla	Tayassuidae	Dicotyles	angulatus	Dicotyles angulatus	M-L	Video CONANP	CM	2014	San Felipe Usila	2	MCF
Artiodactyla	Tayassuidae	Dicotyles	angulatus	Dicotyles angulatus	M-L	Video CONANP	CM	2014	San Felipe Usila	2	MCF
Carnivora	Mustelidae	Eira	barbara	Eira barbara	M-L	Fotocolecta CONANP	CM	2014	San Felipe Usila	3	MCF
Carnivora	Mustelidae	Eira	barbara	Eira barbara	M-L	Video CONANP	CM	2014	San Felipe Usila	2	MCF
Carnivora	Mustelidae	Eira	barbara	Eira barbara	M-L	Video CONANP	CM	2014	San Felipe Usila	2	MCF
Carnivora	Mustelidae	Eira	barbara	Eira barbara	M-L	Video CONANP	CM	2014	San Felipe Usila	2	MCF
Carnivora	Mustelidae	Eira	barbara	Eira barbara	M-L	Video CONANP	CM	2014	San Felipe Usila	2	MCF
Carnivora	Felidae	Leopardus	pardalis	Leopardus pardalis	M-L	Video CONANP	CM	2014	San Felipe Usila	2	MCF
Carnivora	Felidae	Leopardus	wiedii	Leopardus wiedii	M-L	Fotocolecta CONANP	CM	2014	San Felipe Usila	3	MCF
Carnivora	Felidae	Leopardus	wiedii	Leopardus wiedii	M-L	Fotocolecta CONANP	CM	2014	San Felipe Usila	3	MCF
Carnivora	Felidae	Leopardus	wiedii	Leopardus wiedii	M-L	Fotocolecta CONANP	CM	2014	San Felipe Usila	3	MCF
Carnivora	Felidae	Leopardus	wiedii	Leopardus wiedii	M-L	Fotocolecta CONANP	CM	2014	San Felipe Usila	3	MCF
Carnivora	Felidae	Leopardus	wiedii	Leopardus wiedii	M-L	Fotocolecta CONANP	CM	2014	San Felipe Usila	3	MCF
Carnivora	Felidae	Leopardus	wiedii	Leopardus wiedii	M-L	Fotocolecta CONANP	CM	2014	San Felipe Usila	3	MCF
Carnivora	Felidae	Leopardus	wiedii	Leopardus wiedii	M-L	Fotocolecta CONANP	CM	2014	San Felipe Usila	3	MCF
Carnivora	Felidae	Leopardus	wiedii	Leopardus wiedii	M-L	Fotocolecta CONANP	CM	2014	San Felipe Usila	3	MCF
Carnivora	Felidae	Leopardus	wiedii	Leopardus wiedii	M-L	Fotocolecta CONANP	CM	2014	San Felipe Usila	3	MCF
Carnivora	Felidae	Leopardus	wiedii	Leopardus wiedii	M-L	Fotocolecta CONANP	CM	2014	San Felipe Usila	3	MCF
Carnivora	Felidae	Leopardus	wiedii	Leopardus wiedii	M-L	Fotocolecta CONANP	CM	2014	San Felipe Usila	3	MCF
Carnivora	Felidae	Leopardus	wiedii	Leopardus wiedii	M-L	Fotocolecta CONANP	CM	2014	San Felipe Usila	3	MCF
Artiodactyla	Cervidae	Mazama	temama	Mazama temama	M-L	Video CONANP	CM	2014	San Felipe Usila	2	MCF
Artiodactyla	Cervidae	Mazama	temama	Mazama temama	M-L	Video CONANP	CM	2014	San Felipe Usila	2	MCF
Artiodactyla	Cervidae	Mazama	temama	Mazama temama	M-L	Video CONANP	CM	2014	San Felipe Usila	2	MCF
Carnivora	Procyonidae	Nasua	narica	Nasua narica	M-L	Fotocolecta CONANP	CM	2011	San Juan Bautista Valle Nacional	3	MCF
Carnivora	Procyonidae	Nasua	narica	Nasua narica	M-L	Fotocolecta CONANP	CM	2011	San Juan Bautista Valle Nacional	3	MCF
Carnivora	Procyonidae	Nasua	narica	Nasua narica	M-L	Fotocolecta CONANP	CM	2011	San Juan Bautista Valle Nacional	3	MCF
Carnivora	Procyonidae	Nasua	narica	Nasua narica	M-L	Fotocolecta CONANP	CM	2011	San Juan Bautista Valle Nacional	3	MCF
Carnivora	Procyonidae	Nasua	narica	Nasua narica	M-L	Fotocolecta CONANP	CM	2011	San Juan Bautista Valle Nacional	3	MCF
Carnivora	Procyonidae	Nasua	narica	Nasua narica	M-L	Fotocolecta CONANP	CM	2011	San Juan Bautista Valle Nacional	3	MCF
Carnivora	Procyonidae	Nasua	narica	Nasua narica	M-L	Fotocolecta CONANP	CM	2011	San Juan Bautista Valle Nacional	3	MCF
Carnivora	Procyonidae	Nasua	narica	Nasua narica	M-L	Fotocolecta CONANP	CM	2011	San Juan Bautista Valle Nacional	3	MCF
Carnivora	Procyonidae	Nasua	narica	Nasua narica	M-L	Fotocolecta CONANP	CM	2011	San Juan Bautista Valle Nacional	3	MCF
Carnivora	Procyonidae	Nasua	narica	Nasua narica	M-L	Video CONANP	CM	2014	San Felipe Usila	2	MCF
Carnivora	Procyonidae	Nasua	narica	Nasua narica	M-L	Video CONANP	CM	2014	San Felipe Usila	2	MCF
Carnivora	Procyonidae	Nasua	narica	Nasua narica	M-L	Video CONANP	CM	2014	San Felipe Usila	2	MCF
Carnivora	Procyonidae	Nasua	narica	Nasua narica	M-L	Video CONANP	CM	2014	San Felipe Usila	2	MCF
Carnivora	Procyonidae	Nasua	narica	Nasua narica	M-L	Video CONANP	CM	2014	San Felipe Usila	2	MCF
Carnivora	Procyonidae	Nasua	narica	Nasua narica	M-L	Video CONANP	CM	2014	San Felipe Usila	2	MCF
Carnivora	Procyonidae	Nasua	narica	Nasua narica	M-L	Video CONANP	CM	2014	San Felipe Usila	2	MCF
Carnivora	Procyonidae	Nasua	narica	Nasua narica	M-L	Video CONANP	CM	2014	San Felipe Usila	2	MCF
Carnivora	Procyonidae	Nasua	narica	Nasua narica	M-L	Video CONANP	CM	2014	San Felipe Usila	2	MCF
Rodentia	Sciuridae	Sciurus	ND	ND	M-L	Fotocolecta CONANP	CM	2014	San Felipe Usila	3	MCF
Rodentia	Sciuridae	Sciurus	ND	ND	M-L	Fotocolecta CONANP	CM	2014	San Felipe Usila	3	MCF
Rodentia	Sciuridae	Sciurus	ND	ND	M-L	Fotocolecta CONANP	CM	2014	San Felipe Usila	3	MCF
Rodentia	Sciuridae	Sciurus	ND	ND	M-L	Fotocolecta CONANP	CM	2014	San Felipe Usila	3	MCF
Rodentia	Sciuridae	Sciurus	ND	ND	M-L	Fotocolecta CONANP	CM	2014	San Felipe Usila	3	MCF
Rodentia	Sciuridae	Sciurus	ND	ND	M-L	Fotocolecta CONANP	CM	2014	San Felipe Usila	3	MCF
Rodentia	Sciuridae	Sciurus	ND	ND	M-L	Fotocolecta CONANP	CM	2014	San Felipe Usila	3	MCF
Rodentia	Sciuridae	Sciurus	ND	ND	M-L	Fotocolecta CONANP	CM	2014	San Felipe Usila	3	MCF
Didelphimorphia	Didelphidae	Didelphis	ND	ND	M-L	Fotocolecta CONANP	CM	2014	San Felipe Usila	3	MCF
Didelphimorphia	Didelphidae	Didelphis	ND	ND	M-L	Fotocolecta CONANP	CM	2014	San Felipe Usila	3	MCF
Rodentia	Sciuridae	Sciurus	ND	ND	M-L	Fotocolecta CONANP	CM	2014	San Felipe Usila	3	MCF
Didelphimorphia	Didelphidae	Didelphis	ND	ND	M-L	Fotocolecta CONANP	CM	2014	San Felipe Usila	3	MCF
Didelphimorphia	Didelphidae	Didelphis	ND	ND	M-L	Fotocolecta CONANP	CM	2014	San Felipe Usila	3	MCF
Didelphimorphia	Didelphidae	Didelphis	ND	ND	M-L	Fotocolecta CONANP	CM	2014	San Felipe Usila	3	MCF
Rodentia	Sciuridae	Sciurus	ND	ND	M-L	Fotocolecta CONANP	CM	2014	San Felipe Usila	3	MCF
Rodentia	Sciuridae	Sciurus	ND	ND	M-L	Fotocolecta CONANP	CM	2014	San Felipe Usila	3	MCF
Rodentia	Sciuridae	Sciurus	ND	ND	M-L	Fotocolecta CONANP	CM	2014	San Felipe Usila	3	MCF
Rodentia	Sciuridae	Sciurus	ND	ND	M-L	Fotocolecta CONANP	CM	2014	San Felipe Usila	3	MCF
Rodentia	Sciuridae	Sciurus	ND	ND	M-L	Fotocolecta CONANP	CM	2014	San Felipe Usila	3	MCF
Didelphimorphia	Didelphidae	Didelphis	ND	ND	M-L	Video CONANP	CM	2014	San Felipe Usila	2	MCF
Carnivora	Felidae	Panthera	onca	Panthera onca	M-L	Fotocolecta CONANP	CM	2014	San Felipe Usila	3	MCF
Carnivora	Felidae	Panthera	onca	Panthera onca	M-L	Fotocolecta CONANP	CM	2014	San Felipe Usila	3	MCF
Carnivora	Felidae	Puma	concolor	Puma concolor	M-L	Fotocolecta CONANP	CM	2014	San Felipe Usila	3	MCF
Carnivora	Felidae	Puma	concolor	Puma concolor	M-L	Fotocolecta CONANP	CM	2014	San Felipe Usila	3	MCF
Carnivora	Felidae	Puma	concolor	Puma concolor	M-L	Fotocolecta CONANP	CM	2014	San Felipe Usila	3	MCF
Carnivora	Felidae	Puma	concolor	Puma concolor	M-L	Fotocolecta CONANP	CM	2014	San Felipe Usila	3	MCF
Carnivora	Felidae	Puma	concolor	Puma concolor	M-L	Fotocolecta CONANP	CM	2014	San Felipe Usila	3	MCF
Carnivora	Felidae	Puma	concolor	Puma concolor	M-L	Fotocolecta CONANP	CM	2014	San Felipe Usila	3	MCF
Carnivora	Felidae	Puma	concolor	Puma concolor	M-L	Fotocolecta CONANP	CM	2014	San Felipe Usila	3	MCF
Carnivora	Felidae	Puma	concolor	Puma concolor	M-L	Fotocolecta CONANP	CM	2014	San Felipe Usila	3	MCF
Carnivora	Felidae	Puma	concolor	Puma concolor	M-L	Fotocolecta CONANP	CM	2014	San Felipe Usila	3	MCF
Carnivora	Felidae	Puma	concolor	Puma concolor	M-L	Fotocolecta CONANP	CM	2011	San Juan Bautista Valle Nacional	3	MCF
Carnivora	Felidae	Puma	concolor	Puma concolor	M-L	Video CONANP	CM	2014	San Felipe Usila	2	MCF
Carnivora	Felidae	Puma	concolor	Puma concolor	M-L	Video CONANP	CM	2014	San Felipe Usila	2	MCF
Carnivora	Felidae	Puma	yagouaroundi	Puma yagouaroundi	M-L	Fotocolecta CONANP	CM	2014	San Felipe Usila	3	MCF
Carnivora	Felidae	Puma	yagouaroundi	Puma yagouaroundi	M-L	Video CONANP	CM	2014	San Felipe Usila	2	MCF
Carnivora	Felidae	Puma	yagouaroundi	Puma yagouaroundi	M-L	Video CONANP	CM	2014	San Felipe Usila	2	MCF
Rodentia	Sciuridae	Sciurus	aureogaster	Sciurus aureogaster	M-L	Video CONANP	CM	2014	San Felipe Usila	2	MCF
Rodentia	Sciuridae	Sciurus	deppei	Sciurus deppei	M-L	Fotocolecta CONANP	CM	2014	San Felipe Usila	3	MCF
Rodentia	Sciuridae	Sciurus	deppei	Sciurus deppei	M-L	Fotocolecta CONANP	CM	2014	San Felipe Usila	3	MCF
Rodentia	Sciuridae	Sciurus	deppei	Sciurus deppei	M-L	Fotocolecta CONANP	CM	2014	San Felipe Usila	3	MCF
Rodentia	Sciuridae	Sciurus	deppei	Sciurus deppei	M-L	Fotocolecta CONANP	CM	2014	San Felipe Usila	3	MCF
Rodentia	Sciuridae	Sciurus	deppei	Sciurus deppei	M-L	Fotocolecta CONANP	CM	2014	San Felipe Usila	3	MCF
Rodentia	Sciuridae	Sciurus	deppei	Sciurus deppei	M-L	Fotocolecta CONANP	CM	2014	San Felipe Usila	3	MCF
Rodentia	Sciuridae	Sciurus	deppei	Sciurus deppei	M-L	Fotocolecta CONANP	CM	2014	San Felipe Usila	3	MCF
Pilosa	Myrmecophagidae	Tamandua	mexicana	Tamandua mexicana	M-L	Fotocolecta CONANP	CM	2014	San Felipe Usila	3	MCF
Rodentia	Cuniculidae	Cuniculus	paca	Cuniculus paca	M-L	Fotocolecta CONANP	CM	2013	San Felipe Usila	2	P-OF
Rodentia	Cuniculidae	Cuniculus	paca	Cuniculus paca	M-L	Fotocolecta CONANP	CM	2013	San Felipe Usila	3	P-OF
Rodentia	Cuniculidae	Cuniculus	paca	Cuniculus paca	M-L	Fotocolecta CONANP	CM	2013	San Felipe Usila	3	P-OF
Rodentia	Cuniculidae	Cuniculus	paca	Cuniculus paca	M-L	Fotocolecta CONANP	CM	2013	San Felipe Usila	3	P-OF
Rodentia	Cuniculidae	Cuniculus	paca	Cuniculus paca	M-L	Fotocolecta CONANP	CM	2014	San Felipe Usila	3	P-OF
Carnivora	Mustelidae	Eira	barbara	Eira barbara	M-L	Fotocolecta CONANP	CM	2013	San Felipe Usila	3	P-OF
Carnivora	Mustelidae	Eira	barbara	Eira barbara	M-L	Fotocolecta CONANP	CM	2014	San Felipe Usila	3	P-OF
Carnivora	Felidae	Leopardus	pardalis	Leopardus pardalis	M-L	Fotocolecta CONANP	CM	2014	San Felipe Usila	2	P-OF
Carnivora	Felidae	Leopardus	pardalis	Leopardus pardalis	M-L	Fotocolecta CONANP	CM	2014	San Felipe Usila	2	P-OF
Carnivora	Felidae	Leopardus	wiedii	Leopardus wiedii	M-L	Fotocolecta CONANP	CM	2014	San Felipe Usila	3	P-OF
Carnivora	Felidae	Leopardus	wiedii	Leopardus wiedii	M-L	Fotocolecta CONANP	CM	2014	San Felipe Usila	3	P-OF
Carnivora	Felidae	Leopardus	wiedii	Leopardus wiedii	M-L	Fotocolecta CONANP	CM	2014	San Felipe Usila	3	P-OF
Carnivora	Felidae	Leopardus	wiedii	Leopardus wiedii	M-L	Fotocolecta CONANP	CM	2014	San Felipe Usila	3	P-OF
Artiodactyla	Cervidae	Mazama	temama	Mazama temama	M-L	Fotocolecta CONANP	CM	2014	San Felipe Usila	2	P-OF
Artiodactyla	Cervidae	Mazama	temama	Mazama temama	M-L	Fotocolecta CONANP	CM	2014	San Felipe Usila	2	P-OF
Artiodactyla	Cervidae	Mazama	temama	Mazama temama	M-L	Fotocolecta CONANP	CM	2014	San Felipe Usila	2	P-OF
Artiodactyla	Cervidae	Mazama	temama	Mazama temama	M-L	Fotocolecta CONANP	CM	2014	San Felipe Usila	2	P-OF
Artiodactyla	Cervidae	Mazama	temama	Mazama temama	M-L	Fotocolecta CONANP	CM	2014	San Felipe Usila	2	P-OF
Artiodactyla	Cervidae	Mazama	temama	Mazama temama	M-L	Fotocolecta CONANP	CM	2014	San Felipe Usila	3	P-OF
Artiodactyla	Cervidae	Mazama	temama	Mazama temama	M-L	Fotocolecta CONANP	CM	2014	San Felipe Usila	3	P-OF
Artiodactyla	Cervidae	Mazama	temama	Mazama temama	M-L	Fotocolecta CONANP	CM	2014	San Felipe Usila	3	P-OF
Artiodactyla	Cervidae	Mazama	temama	Mazama temama	M-L	Fotocolecta CONANP	CM	2014	San Felipe Usila	3	P-OF
Carnivora	Procyonidae	Nasua	narica	Nasua narica	M-L	Fotocolecta CONANP	CM	2014	San Felipe Usila	3	P-OF
Didelphimorphia	Didelphidae	Didelphis	ND	ND	M-L	Fotocolecta CONANP	CM	2013	San Felipe Usila	3	P-OF
Didelphimorphia	Didelphidae	Didelphis	ND	ND	M-L	Fotocolecta CONANP	CM	2013	San Felipe Usila	3	P-OF
Didelphimorphia	Didelphidae	Didelphis	ND	ND	M-L	Fotocolecta CONANP	CM	2013	San Felipe Usila	3	P-OF
Didelphimorphia	Didelphidae	Didelphis	ND	ND	M-L	Fotocolecta CONANP	CM	2014	San Felipe Usila	3	P-OF
Didelphimorphia	Didelphidae	Didelphis	ND	ND	M-L	Fotocolecta CONANP	CM	2014	San Felipe Usila	3	P-OF
Didelphimorphia	Didelphidae	Didelphis	ND	ND	M-L	Fotocolecta CONANP	CM	2014	San Felipe Usila	3	P-OF
Rodentia	Sciuridae	Sciurus	ND	ND	M-L	Fotocolecta CONANP	CM	2014	San Felipe Usila	3	P-OF
Rodentia	Sciuridae	Sciurus	ND	ND	M-L	Fotocolecta CONANP	CM	2014	San Felipe Usila	3	P-OF
Rodentia	Sciuridae	Sciurus	ND	ND	M-L	Fotocolecta CONANP	CM	2014	San Felipe Usila	3	P-OF
Rodentia	Sciuridae	Sciurus	ND	ND	M-L	Fotocolecta CONANP	CM	2014	San Felipe Usila	3	P-OF
Rodentia	Sciuridae	Sciurus	ND	ND	M-L	Fotocolecta CONANP	CM	2014	San Felipe Usila	3	P-OF
Rodentia	Sciuridae	Sciurus	ND	ND	M-L	Fotocolecta CONANP	CM	2014	San Felipe Usila	3	P-OF
Rodentia	Sciuridae	Sciurus	ND	ND	M-L	Fotocolecta CONANP	CM	2014	San Felipe Usila	3	P-OF
Rodentia	Sciuridae	Sciurus	ND	ND	M-L	Fotocolecta CONANP	CM	2014	San Felipe Usila	3	P-OF
Rodentia	Sciuridae	Sciurus	ND	ND	M-L	Fotocolecta CONANP	CM	2014	San Felipe Usila	3	P-OF
Didelphimorphia	Didelphidae	Didelphis	ND	ND	M-L	Fotocolecta CONANP	CM	2014	San Felipe Usila	3	P-OF
Didelphimorphia	Didelphidae	Didelphis	ND	ND	M-L	Fotocolecta CONANP	CM	2014	San Felipe Usila	3	P-OF
Didelphimorphia	Didelphidae	Didelphis	ND	ND	M-L	Fotocolecta CONANP	CM	2014	San Felipe Usila	3	P-OF
Didelphimorphia	Didelphidae	Didelphis	ND	ND	M-L	Fotocolecta CONANP	CM	2014	San Felipe Usila	3	P-OF
Didelphimorphia	Didelphidae	Didelphis	ND	ND	M-L	Fotocolecta CONANP	CM	2014	San Felipe Usila	3	P-OF
Didelphimorphia	Didelphidae	Didelphis	ND	ND	M-L	Fotocolecta CONANP	CM	2014	San Felipe Usila	3	P-OF
Didelphimorphia	Didelphidae	Didelphis	ND	ND	M-L	Fotocolecta CONANP	CM	2014	San Felipe Usila	3	P-OF
Didelphimorphia	Didelphidae	Didelphis	ND	ND	M-L	Fotocolecta CONANP	CM	2014	San Felipe Usila	3	P-OF
Didelphimorphia	Didelphidae	Didelphis	ND	ND	M-L	Fotocolecta CONANP	CM	2014	San Felipe Usila	3	P-OF
Didelphimorphia	Didelphidae	Didelphis	ND	ND	M-L	Fotocolecta CONANP	CM	2014	San Felipe Usila	3	P-OF
Didelphimorphia	Didelphidae	Didelphis	ND	ND	M-L	Fotocolecta CONANP	CM	2014	San Felipe Usila	3	P-OF
Didelphimorphia	Didelphidae	Didelphis	ND	ND	M-L	Fotocolecta CONANP	CM	2014	San Felipe Usila	3	P-OF
Didelphimorphia	Didelphidae	Didelphis	ND	ND	M-L	Fotocolecta CONANP	CM	2014	San Felipe Usila	3	P-OF
Didelphimorphia	Didelphidae	Didelphis	ND	ND	M-L	Fotocolecta CONANP	CM	2014	San Felipe Usila	3	P-OF
Didelphimorphia	Didelphidae	Didelphis	ND	ND	M-L	Fotocolecta CONANP	CM	2014	San Felipe Usila	3	P-OF
Didelphimorphia	Didelphidae	Didelphis	ND	ND	M-L	Fotocolecta CONANP	CM	2014	San Felipe Usila	3	P-OF
Didelphimorphia	Didelphidae	Didelphis	ND	ND	M-L	Fotocolecta CONANP	CM	2014	San Felipe Usila	3	P-OF
Didelphimorphia	Didelphidae	Didelphis	ND	ND	M-L	Fotocolecta CONANP	CM	2014	San Felipe Usila	3	P-OF
Didelphimorphia	Didelphidae	Didelphis	ND	ND	M-L	Fotocolecta CONANP	CM	2014	San Felipe Usila	3	P-OF
Didelphimorphia	Didelphidae	Didelphis	ND	ND	M-L	Fotocolecta CONANP	CM	2014	San Felipe Usila	3	P-OF
Didelphimorphia	Didelphidae	Didelphis	ND	ND	M-L	Fotocolecta CONANP	CM	2014	San Felipe Usila	3	P-OF
Didelphimorphia	Didelphidae	Didelphis	ND	ND	M-L	Fotocolecta CONANP	CM	2014	San Felipe Usila	3	P-OF
Didelphimorphia	Didelphidae	Didelphis	ND	ND	M-L	Fotocolecta CONANP	CM	2014	San Felipe Usila	3	P-OF
Didelphimorphia	Didelphidae	Didelphis	ND	ND	M-L	Fotocolecta CONANP	CM	2014	San Felipe Usila	3	P-OF
Didelphimorphia	Didelphidae	Didelphis	ND	ND	M-L	Fotocolecta CONANP	CM	2014	San Felipe Usila	3	P-OF
Didelphimorphia	Didelphidae	Didelphis	ND	ND	M-L	Fotocolecta CONANP	CM	2014	San Felipe Usila	3	P-OF
Didelphimorphia	Didelphidae	Didelphis	ND	ND	M-L	Fotocolecta CONANP	CM	2014	San Felipe Usila	3	P-OF
Didelphimorphia	Didelphidae	Didelphis	ND	ND	M-L	Fotocolecta CONANP	CM	2014	San Felipe Usila	3	P-OF
Didelphimorphia	Didelphidae	Didelphis	ND	ND	M-L	Fotocolecta CONANP	CM	2014	San Felipe Usila	3	P-OF
Rodentia	Sciuridae	Sciurus	ND	ND	M-L	Fotocolecta CONANP	CM	2014	San Felipe Usila	3	P-OF
Rodentia	Sciuridae	Sciurus	ND	ND	M-L	Fotocolecta CONANP	CM	2014	San Felipe Usila	3	P-OF
Rodentia	Sciuridae	Sciurus	ND	ND	M-L	Fotocolecta CONANP	CM	2014	San Felipe Usila	3	P-OF
Rodentia	Sciuridae	Sciurus	ND	ND	M-L	Fotocolecta CONANP	CM	2014	San Felipe Usila	3	P-OF
Rodentia	Sciuridae	Sciurus	ND	ND	M-L	Fotocolecta CONANP	CM	2014	San Felipe Usila	3	P-OF
Carnivora	Felidae	Panthera	onca	Panthera onca	M-L	Fotocolecta CONANP	CM	2014	San Felipe Usila	2	P-OF
Carnivora	Felidae	Puma	concolor	Puma concolor	M-L	Fotocolecta CONANP	CM	2014	San Felipe Usila	3	P-OF
Carnivora	Felidae	Puma	concolor	Puma concolor	M-L	Fotocolecta CONANP	CM	2014	San Felipe Usila	3	P-OF
Rodentia	Sciuridae	Sciurus	deppei	Sciurus deppei	M-L	Fotocolecta CONANP	CM	2014	San Felipe Usila	3	P-OF
Rodentia	Sciuridae	Sciurus	deppei	Sciurus deppei	M-L	Fotocolecta CONANP	CM	2014	San Felipe Usila	3	P-OF
Rodentia	Sciuridae	Sciurus	deppei	Sciurus deppei	M-L	Fotocolecta CONANP	CM	2014	San Felipe Usila	3	P-OF
Rodentia	Sciuridae	Sciurus	deppei	Sciurus deppei	M-L	Fotocolecta CONANP	CM	2014	San Felipe Usila	3	P-OF
Rodentia	Sciuridae	Sciurus	deppei	Sciurus deppei	M-L	Fotocolecta CONANP	CM	2014	San Felipe Usila	3	P-OF
Rodentia	Sciuridae	Sciurus	deppei	Sciurus deppei	M-L	Fotocolecta CONANP	CM	2014	San Felipe Usila	3	P-OF
Rodentia	Sciuridae	Sciurus	deppei	Sciurus deppei	M-L	Fotocolecta CONANP	CM	2014	San Felipe Usila	3	P-OF
Rodentia	Sciuridae	Sciurus	deppei	Sciurus deppei	M-L	Fotocolecta CONANP	CM	2014	San Felipe Usila	3	P-OF
Rodentia	Sciuridae	Sciurus	deppei	Sciurus deppei	M-L	Fotocolecta CONANP	CM	2014	San Felipe Usila	3	P-OF
Rodentia	Sciuridae	Sciurus	deppei	Sciurus deppei	M-L	Fotocolecta CONANP	CM	2014	San Felipe Usila	3	P-OF
Rodentia	Sciuridae	Sciurus	deppei	Sciurus deppei	M-L	Fotocolecta CONANP	CM	2014	San Felipe Usila	3	P-OF
Rodentia	Sciuridae	Sciurus	deppei	Sciurus deppei	M-L	Fotocolecta CONANP	CM	2014	San Felipe Usila	3	P-OF
Rodentia	Sciuridae	Sciurus	deppei	Sciurus deppei	M-L	Fotocolecta CONANP	CM	2014	San Felipe Usila	3	P-OF
Rodentia	Sciuridae	Sciurus	deppei	Sciurus deppei	M-L	Fotocolecta CONANP	CM	2014	San Felipe Usila	3	P-OF
Didelphimorphia	Didelphidae	Caluromys	derbianus	Caluromys debianus	M-L	Fotocolecta CONANP	CM	2012	San Miguel Soyaltepec	1	TRF
Didelphimorphia	Didelphidae	Caluromys	derbianus	Caluromys debianus	M-L	Fotocolecta CONANP	CM	2012	San Miguel Soyaltepec	1	TRF
Carnivora	Canidae	Canis	latrans	Canis latrans	M-L	Fotocolecta CONANP	CM	2013	San José Chiltepec	1	TRF
Carnivora	Canidae	Canis	latrans	Canis latrans	M-L	Fotocolecta CONANP	CM	2013	San José Chiltepec	1	TRF
Carnivora	Canidae	Canis	latrans	Canis latrans	M-L	Fotocolecta CONANP	CM	2013	San José Chiltepec	1	TRF
Carnivora	Canidae	Canis	latrans	Canis latrans	M-L	Fotocolecta CONANP	CM	2013	San José Chiltepec	1	TRF
Carnivora	Canidae	Canis	latrans	Canis latrans	M-L	Fotocolecta CONANP	CM	2013	San José Chiltepec	1	TRF
Carnivora	Canidae	Canis	latrans	Canis latrans	M-L	Fotocolecta CONANP	CM	2013	San José Chiltepec	1	TRF
Carnivora	Canidae	Canis	latrans	Canis latrans	M-L	Fotocolecta CONANP	CM	2013	San José Chiltepec	1	TRF
Carnivora	Canidae	Canis	latrans	Canis latrans	M-L	Fotocolecta CONANP	CM	2013	San José Chiltepec	1	TRF
Carnivora	Canidae	Canis	latrans	Canis latrans	M-L	Fotocolecta CONANP	CM	2013	San José Chiltepec	1	TRF
Carnivora	Canidae	Canis	latrans	Canis latrans	M-L	Fotocolecta CONANP	CM	2014	Santiago Jocotepec	1	TRF
Carnivora	Canidae	Canis	latrans	Canis latrans	M-L	Fotocolecta CONANP	CM	2014	Santiago Jocotepec	1	TRF
Carnivora	Canidae	Canis	latrans	Canis latrans	M-L	Fotocolecta CONANP	CM	2014	Santiago Jocotepec	1	TRF
Carnivora	Canidae	Canis	latrans	Canis latrans	M-L	Fotocolecta CONANP	CM	2014	Santiago Jocotepec	1	TRF
Carnivora	Canidae	Canis	latrans	Canis latrans	M-L	Fotocolecta CONANP	CM	2014	Santiago Jocotepec	1	TRF
Carnivora	Canidae	Canis	latrans	Canis latrans	M-L	Video CONANP	CM	2013	Santiago Jocotepec	1	TRF
Carnivora	Canidae	Canis	latrans	Canis latrans	M-L	Video CONANP	CM	2014	Santiago Jocotepec	1	TRF
Carnivora	Canidae	Canis	latrans	Canis latrans	M-L	Video CONANP	CM	2014	Santiago Jocotepec	1	TRF
Carnivora	Mephitidae	Conepatus	semistriatus	Conepatus semistriatus	M-L	Fotocolecta CONANP	CM	2013	Santa María Jacatepec	2	TRF
Carnivora	Mephitidae	Conepatus	semistriatus	Conepatus semistriatus	M-L	Fotocolecta CONANP	CM	2012	Santiago Jocotepec	1	TRF
Carnivora	Mephitidae	Conepatus	semistriatus	Conepatus semistriatus	M-L	Fotocolecta CONANP	CM	2014	Santiago Jocotepec	1	TRF
Carnivora	Mephitidae	Conepatus	semistriatus	Conepatus semistriatus	M-L	Video CONANP	CM	2014	San Felipe Usila	2	TRF
Carnivora	Mephitidae	Conepatus	semistriatus	Conepatus semistriatus	M-L	Video CONANP	CM	2014	San Felipe Usila	2	TRF
Carnivora	Mephitidae	Conepatus	semistriatus	Conepatus semistriatus	M-L	Video CONANP	CM	2012	San Juan Bautista Valle Nacional	2	TRF
Carnivora	Mephitidae	Conepatus	semistriatus	Conepatus semistriatus	M-L	Video CONANP	CM	2013	San Juan Bautista Valle Nacional	1	TRF
Rodentia	Cuniculidae	Cuniculus	paca	Cuniculus paca	M-L	Fotocolecta CONANP	CM	2013	San Felipe Usila	2	TRF
Rodentia	Cuniculidae	Cuniculus	paca	Cuniculus paca	M-L	Fotocolecta CONANP	CM	2013	San Felipe Usila	2	TRF
Rodentia	Cuniculidae	Cuniculus	paca	Cuniculus paca	M-L	Fotocolecta CONANP	CM	2013	San Felipe Usila	2	TRF
Rodentia	Cuniculidae	Cuniculus	paca	Cuniculus paca	M-L	Fotocolecta CONANP	CM	2013	San Felipe Usila	2	TRF
Rodentia	Cuniculidae	Cuniculus	paca	Cuniculus paca	M-L	Fotocolecta CONANP	CM	2013	San Felipe Usila	2	TRF
Rodentia	Cuniculidae	Cuniculus	paca	Cuniculus paca	M-L	Fotocolecta CONANP	CM	2013	San Felipe Usila	2	TRF
Rodentia	Cuniculidae	Cuniculus	paca	Cuniculus paca	M-L	Fotocolecta CONANP	CM	2013	San Felipe Usila	2	TRF
Rodentia	Cuniculidae	Cuniculus	paca	Cuniculus paca	M-L	Fotocolecta CONANP	CM	2013	San Felipe Usila	2	TRF
Rodentia	Cuniculidae	Cuniculus	paca	Cuniculus paca	M-L	Fotocolecta CONANP	CM	2013	San Felipe Usila	2	TRF
Rodentia	Cuniculidae	Cuniculus	paca	Cuniculus paca	M-L	Fotocolecta CONANP	CM	2013	San Felipe Usila	2	TRF
Rodentia	Cuniculidae	Cuniculus	paca	Cuniculus paca	M-L	Fotocolecta CONANP	CM	2013	San Felipe Usila	2	TRF
Rodentia	Cuniculidae	Cuniculus	paca	Cuniculus paca	M-L	Fotocolecta CONANP	CM	2013	San Felipe Usila	2	TRF
Rodentia	Cuniculidae	Cuniculus	paca	Cuniculus paca	M-L	Fotocolecta CONANP	CM	2013	San Felipe Usila	2	TRF
Rodentia	Cuniculidae	Cuniculus	paca	Cuniculus paca	M-L	Fotocolecta CONANP	CM	2013	San Felipe Usila	2	TRF
Rodentia	Cuniculidae	Cuniculus	paca	Cuniculus paca	M-L	Fotocolecta CONANP	CM	2013	San Felipe Usila	2	TRF
Rodentia	Cuniculidae	Cuniculus	paca	Cuniculus paca	M-L	Fotocolecta CONANP	CM	2013	San Felipe Usila	2	TRF
Rodentia	Cuniculidae	Cuniculus	paca	Cuniculus paca	M-L	Fotocolecta CONANP	CM	2013	San Felipe Usila	3	TRF
Rodentia	Cuniculidae	Cuniculus	paca	Cuniculus paca	M-L	Fotocolecta CONANP	CM	2013	San Felipe Usila	3	TRF
Rodentia	Cuniculidae	Cuniculus	paca	Cuniculus paca	M-L	Fotocolecta CONANP	CM	2013	San Felipe Usila	3	TRF
Rodentia	Cuniculidae	Cuniculus	paca	Cuniculus paca	M-L	Fotocolecta CONANP	CM	2014	San Felipe Usila	2	TRF
Rodentia	Cuniculidae	Cuniculus	paca	Cuniculus paca	M-L	Fotocolecta CONANP	CM	2014	San Felipe Usila	2	TRF
Rodentia	Cuniculidae	Cuniculus	paca	Cuniculus paca	M-L	Fotocolecta CONANP	CM	2014	San Felipe Usila	2	TRF
Rodentia	Cuniculidae	Cuniculus	paca	Cuniculus paca	M-L	Fotocolecta CONANP	CM	2014	San Felipe Usila	2	TRF
Rodentia	Cuniculidae	Cuniculus	paca	Cuniculus paca	M-L	Fotocolecta CONANP	CM	2014	San Felipe Usila	2	TRF
Rodentia	Cuniculidae	Cuniculus	paca	Cuniculus paca	M-L	Fotocolecta CONANP	CM	2014	San Felipe Usila	2	TRF
Rodentia	Cuniculidae	Cuniculus	paca	Cuniculus paca	M-L	Fotocolecta CONANP	CM	2014	San Felipe Usila	2	TRF
Rodentia	Cuniculidae	Cuniculus	paca	Cuniculus paca	M-L	Fotocolecta CONANP	CM	2014	San Felipe Usila	3	TRF
Rodentia	Cuniculidae	Cuniculus	paca	Cuniculus paca	M-L	Fotocolecta CONANP	CM	2014	San Felipe Usila	3	TRF
Rodentia	Cuniculidae	Cuniculus	paca	Cuniculus paca	M-L	Fotocolecta CONANP	CM	2014	San Felipe Usila	3	TRF
Rodentia	Cuniculidae	Cuniculus	paca	Cuniculus paca	M-L	Fotocolecta CONANP	CM	2014	San Felipe Usila	3	TRF
Rodentia	Cuniculidae	Cuniculus	paca	Cuniculus paca	M-L	Fotocolecta CONANP	CM	2014	San Felipe Usila	3	TRF
Rodentia	Cuniculidae	Cuniculus	paca	Cuniculus paca	M-L	Fotocolecta CONANP	CM	2014	San José Chiltepec	1	TRF
Rodentia	Cuniculidae	Cuniculus	paca	Cuniculus paca	M-L	Fotocolecta CONANP	CM	2014	San José Chiltepec	1	TRF
Rodentia	Cuniculidae	Cuniculus	paca	Cuniculus paca	M-L	Fotocolecta CONANP	CM	2014	San José Chiltepec	1	TRF
Rodentia	Cuniculidae	Cuniculus	paca	Cuniculus paca	M-L	Fotocolecta CONANP	CM	2011	San Juan Bautista Valle Nacional	2	TRF
Rodentia	Cuniculidae	Cuniculus	paca	Cuniculus paca	M-L	Fotocolecta CONANP	CM	2011	San Juan Bautista Valle Nacional	3	TRF
Rodentia	Cuniculidae	Cuniculus	paca	Cuniculus paca	M-L	Fotocolecta CONANP	CM	2011	San Juan Bautista Valle Nacional	3	TRF
Rodentia	Cuniculidae	Cuniculus	paca	Cuniculus paca	M-L	Fotocolecta CONANP	CM	2011	San Juan Bautista Valle Nacional	3	TRF
Rodentia	Cuniculidae	Cuniculus	paca	Cuniculus paca	M-L	Fotocolecta CONANP	CM	2011	San Juan Bautista Valle Nacional	3	TRF
Rodentia	Cuniculidae	Cuniculus	paca	Cuniculus paca	M-L	Fotocolecta CONANP	CM	2011	San Juan Bautista Valle Nacional	3	TRF
Rodentia	Cuniculidae	Cuniculus	paca	Cuniculus paca	M-L	Fotocolecta CONANP	CM	2011	San Juan Bautista Valle Nacional	3	TRF
Rodentia	Cuniculidae	Cuniculus	paca	Cuniculus paca	M-L	Fotocolecta CONANP	CM	2011	San Juan Bautista Valle Nacional	3	TRF
Rodentia	Cuniculidae	Cuniculus	paca	Cuniculus paca	M-L	Fotocolecta CONANP	CM	2011	San Juan Bautista Valle Nacional	3	TRF
Rodentia	Cuniculidae	Cuniculus	paca	Cuniculus paca	M-L	Fotocolecta CONANP	CM	2011	San Juan Bautista Valle Nacional	3	TRF
Rodentia	Cuniculidae	Cuniculus	paca	Cuniculus paca	M-L	Fotocolecta CONANP	CM	2011	San Juan Bautista Valle Nacional	3	TRF
Rodentia	Cuniculidae	Cuniculus	paca	Cuniculus paca	M-L	Fotocolecta CONANP	CM	2011	San Juan Bautista Valle Nacional	3	TRF
Rodentia	Cuniculidae	Cuniculus	paca	Cuniculus paca	M-L	Fotocolecta CONANP	CM	2011	San Juan Bautista Valle Nacional	3	TRF
Rodentia	Cuniculidae	Cuniculus	paca	Cuniculus paca	M-L	Fotocolecta CONANP	CM	2011	San Juan Bautista Valle Nacional	3	TRF
Rodentia	Cuniculidae	Cuniculus	paca	Cuniculus paca	M-L	Fotocolecta CONANP	CM	2012	San Juan Bautista Valle Nacional	2	TRF
Rodentia	Cuniculidae	Cuniculus	paca	Cuniculus paca	M-L	Fotocolecta CONANP	CM	2012	San Juan Bautista Valle Nacional	2	TRF
Rodentia	Cuniculidae	Cuniculus	paca	Cuniculus paca	M-L	Fotocolecta CONANP	CM	2012	San Juan Bautista Valle Nacional	2	TRF
Rodentia	Cuniculidae	Cuniculus	paca	Cuniculus paca	M-L	Fotocolecta CONANP	CM	2013	San Juan Bautista Valle Nacional	1	TRF
Rodentia	Cuniculidae	Cuniculus	paca	Cuniculus paca	M-L	Fotocolecta CONANP	CM	2013	San Juan Bautista Valle Nacional	1	TRF
Rodentia	Cuniculidae	Cuniculus	paca	Cuniculus paca	M-L	Fotocolecta CONANP	CM	2013	San Juan Bautista Valle Nacional	1	TRF
Rodentia	Cuniculidae	Cuniculus	paca	Cuniculus paca	M-L	Fotocolecta CONANP	CM	2014	San Juan Bautista Valle Nacional	1	TRF
Rodentia	Cuniculidae	Cuniculus	paca	Cuniculus paca	M-L	Fotocolecta CONANP	CM	2014	San Juan Bautista Valle Nacional	1	TRF
Rodentia	Cuniculidae	Cuniculus	paca	Cuniculus paca	M-L	Fotocolecta CONANP	CM	2014	San Juan Bautista Valle Nacional	1	TRF
Rodentia	Cuniculidae	Cuniculus	paca	Cuniculus paca	M-L	Fotocolecta CONANP	CM	2014	San Juan Bautista Valle Nacional	1	TRF
Rodentia	Cuniculidae	Cuniculus	paca	Cuniculus paca	M-L	Fotocolecta CONANP	CM	2014	San Juan Bautista Valle Nacional	1	TRF
Rodentia	Cuniculidae	Cuniculus	paca	Cuniculus paca	M-L	Fotocolecta CONANP	CM	2014	San Juan Bautista Valle Nacional	1	TRF
Rodentia	Cuniculidae	Cuniculus	paca	Cuniculus paca	M-L	Fotocolecta CONANP	CM	2014	San Juan Bautista Valle Nacional	1	TRF
Rodentia	Cuniculidae	Cuniculus	paca	Cuniculus paca	M-L	Fotocolecta CONANP	CM	2014	San Juan Bautista Valle Nacional	1	TRF
Rodentia	Cuniculidae	Cuniculus	paca	Cuniculus paca	M-L	Fotocolecta CONANP	CM	2014	San Juan Bautista Valle Nacional	1	TRF
Rodentia	Cuniculidae	Cuniculus	paca	Cuniculus paca	M-L	Fotocolecta CONANP	CM	2014	San Juan Bautista Valle Nacional	1	TRF
Rodentia	Cuniculidae	Cuniculus	paca	Cuniculus paca	M-L	Fotocolecta CONANP	CM	2014	San Juan Bautista Valle Nacional	1	TRF
Rodentia	Cuniculidae	Cuniculus	paca	Cuniculus paca	M-L	Fotocolecta CONANP	CM	2014	San Juan Bautista Valle Nacional	1	TRF
Rodentia	Cuniculidae	Cuniculus	paca	Cuniculus paca	M-L	Fotocolecta CONANP	CM	2014	San Juan Bautista Valle Nacional	3	TRF
Rodentia	Cuniculidae	Cuniculus	paca	Cuniculus paca	M-L	Fotocolecta CONANP	CM	2012	San Miguel Soyaltepec	1	TRF
Rodentia	Cuniculidae	Cuniculus	paca	Cuniculus paca	M-L	Fotocolecta CONANP	CM	2012	San Miguel Soyaltepec	1	TRF
Rodentia	Cuniculidae	Cuniculus	paca	Cuniculus paca	M-L	Fotocolecta CONANP	CM	2012	San Miguel Soyaltepec	1	TRF
Rodentia	Cuniculidae	Cuniculus	paca	Cuniculus paca	M-L	Fotocolecta CONANP	CM	2012	San Miguel Soyaltepec	1	TRF
Rodentia	Cuniculidae	Cuniculus	paca	Cuniculus paca	M-L	Fotocolecta CONANP	CM	2012	San Miguel Soyaltepec	1	TRF
Rodentia	Cuniculidae	Cuniculus	paca	Cuniculus paca	M-L	Fotocolecta CONANP	CM	2012	San Miguel Soyaltepec	1	TRF
Rodentia	Cuniculidae	Cuniculus	paca	Cuniculus paca	M-L	Fotocolecta CONANP	CM	2012	San Miguel Soyaltepec	1	TRF
Rodentia	Cuniculidae	Cuniculus	paca	Cuniculus paca	M-L	Fotocolecta CONANP	CM	2013	Santa María Jacatepec	2	TRF
Rodentia	Cuniculidae	Cuniculus	paca	Cuniculus paca	M-L	Fotocolecta CONANP	CM	2014	Santa María Jacatepec	1	TRF
Rodentia	Cuniculidae	Cuniculus	paca	Cuniculus paca	M-L	Fotocolecta CONANP	CM	2014	Santa María Jacatepec	1	TRF
Rodentia	Cuniculidae	Cuniculus	paca	Cuniculus paca	M-L	Fotocolecta CONANP	CM	2014	Santa María Jacatepec	1	TRF
Rodentia	Cuniculidae	Cuniculus	paca	Cuniculus paca	M-L	Fotocolecta CONANP	CM	2014	Santa María Jacatepec	1	TRF
Rodentia	Cuniculidae	Cuniculus	paca	Cuniculus paca	M-L	Fotocolecta CONANP	CM	2014	Santa María Jacatepec	1	TRF
Rodentia	Cuniculidae	Cuniculus	paca	Cuniculus paca	M-L	Fotocolecta CONANP	CM	2014	Santa María Jacatepec	1	TRF
Rodentia	Cuniculidae	Cuniculus	paca	Cuniculus paca	M-L	Fotocolecta CONANP	CM	2014	Santa María Jacatepec	1	TRF
Rodentia	Cuniculidae	Cuniculus	paca	Cuniculus paca	M-L	Fotocolecta CONANP	CM	2014	Santa María Jacatepec	1	TRF
Rodentia	Cuniculidae	Cuniculus	paca	Cuniculus paca	M-L	Fotocolecta CONANP	CM	2014	Santa María Jacatepec	1	TRF
Rodentia	Cuniculidae	Cuniculus	paca	Cuniculus paca	M-L	Fotocolecta CONANP	CM	2014	Santa María Jacatepec	1	TRF
Rodentia	Cuniculidae	Cuniculus	paca	Cuniculus paca	M-L	Fotocolecta CONANP	CM	2014	Santa María Jacatepec	1	TRF
Rodentia	Cuniculidae	Cuniculus	paca	Cuniculus paca	M-L	Fotocolecta CONANP	CM	2014	Santa María Jacatepec	1	TRF
Rodentia	Cuniculidae	Cuniculus	paca	Cuniculus paca	M-L	Fotocolecta CONANP	CM	2014	Santa María Jacatepec	1	TRF
Rodentia	Cuniculidae	Cuniculus	paca	Cuniculus paca	M-L	Fotocolecta CONANP	CM	2014	Santa María Jacatepec	1	TRF
Rodentia	Cuniculidae	Cuniculus	paca	Cuniculus paca	M-L	Fotocolecta CONANP	CM	2014	Santa María Jacatepec	1	TRF
Rodentia	Cuniculidae	Cuniculus	paca	Cuniculus paca	M-L	Fotocolecta CONANP	CM	2014	Santa María Jacatepec	1	TRF
Rodentia	Cuniculidae	Cuniculus	paca	Cuniculus paca	M-L	Fotocolecta CONANP	CM	2014	Santa María Jacatepec	1	TRF
Rodentia	Cuniculidae	Cuniculus	paca	Cuniculus paca	M-L	Fotocolecta CONANP	CM	2014	Santa María Jacatepec	1	TRF
Rodentia	Cuniculidae	Cuniculus	paca	Cuniculus paca	M-L	Fotocolecta CONANP	CM	2014	Santa María Jacatepec	1	TRF
Rodentia	Cuniculidae	Cuniculus	paca	Cuniculus paca	M-L	Fotocolecta CONANP	CM	2015	Santa María Jacatepec	1	TRF
Rodentia	Cuniculidae	Cuniculus	paca	Cuniculus paca	M-L	Fotocolecta CONANP	CM	2014	Santiago Jocotepec	1	TRF
Rodentia	Cuniculidae	Cuniculus	paca	Cuniculus paca	M-L	Fotocolecta CONANP	CM	2014	Santiago Jocotepec	1	TRF
Rodentia	Cuniculidae	Cuniculus	paca	Cuniculus paca	M-L	Fotocolecta CONANP	CM	2014	Santiago Jocotepec	1	TRF
Rodentia	Cuniculidae	Cuniculus	paca	Cuniculus paca	M-L	Fotocolecta CONANP	CM	2014	Santiago Jocotepec	1	TRF
Rodentia	Cuniculidae	Cuniculus	paca	Cuniculus paca	M-L	Fotocolecta CONANP	CM	2014	Santiago Jocotepec	1	TRF
Rodentia	Cuniculidae	Cuniculus	paca	Cuniculus paca	M-L	Fotocolecta CONANP	CM	2014	Santiago Jocotepec	1	TRF
Rodentia	Cuniculidae	Cuniculus	paca	Cuniculus paca	M-L	Fotocolecta CONANP	CM	2014	Santiago Jocotepec	1	TRF
Rodentia	Cuniculidae	Cuniculus	paca	Cuniculus paca	M-L	Fotocolecta CONANP	CM	2014	Santiago Jocotepec	1	TRF
Rodentia	Cuniculidae	Cuniculus	paca	Cuniculus paca	M-L	Fotocolecta CONANP	CM	2014	Santiago Jocotepec	1	TRF
Rodentia	Cuniculidae	Cuniculus	paca	Cuniculus paca	M-L	Fotocolecta CONANP	CM	2014	Santiago Jocotepec	1	TRF
Rodentia	Cuniculidae	Cuniculus	paca	Cuniculus paca	M-L	Fotocolecta CONANP	CM	2014	Santiago Jocotepec	1	TRF
Rodentia	Cuniculidae	Cuniculus	paca	Cuniculus paca	M-L	Fotocolecta CONANP	CM	2014	Santiago Jocotepec	1	TRF
Rodentia	Cuniculidae	Cuniculus	paca	Cuniculus paca	M-L	Fotocolecta CONANP	CM	2014	Santiago Jocotepec	1	TRF
Rodentia	Cuniculidae	Cuniculus	paca	Cuniculus paca	M-L	Fotocolecta CONANP	CM	2014	Santiago Jocotepec	1	TRF
Rodentia	Cuniculidae	Cuniculus	paca	Cuniculus paca	M-L	Fotocolecta CONANP	CM	2014	Santiago Jocotepec	1	TRF
Rodentia	Cuniculidae	Cuniculus	paca	Cuniculus paca	M-L	Fotocolecta CONANP	CM	2014	Santiago Jocotepec	1	TRF
Rodentia	Cuniculidae	Cuniculus	paca	Cuniculus paca	M-L	Fotocolecta CONANP	CM	2014	Santiago Jocotepec	1	TRF
Rodentia	Cuniculidae	Cuniculus	paca	Cuniculus paca	M-L	Fotocolecta CONANP	CM	2014	Santiago Jocotepec	1	TRF
Rodentia	Cuniculidae	Cuniculus	paca	Cuniculus paca	M-L	Fotocolecta CONANP	CM	2014	Santiago Jocotepec	1	TRF
Rodentia	Cuniculidae	Cuniculus	paca	Cuniculus paca	M-L	Fotocolecta CONANP	CM	2014	Santiago Jocotepec	1	TRF
Rodentia	Cuniculidae	Cuniculus	paca	Cuniculus paca	M-L	Fotocolecta CONANP	CM	2014	Santiago Jocotepec	1	TRF
Rodentia	Cuniculidae	Cuniculus	paca	Cuniculus paca	M-L	Fotocolecta CONANP	CM	2014	Santiago Jocotepec	1	TRF
Rodentia	Cuniculidae	Cuniculus	paca	Cuniculus paca	M-L	Fotocolecta CONANP	CM	2014	Santiago Jocotepec	1	TRF
Rodentia	Cuniculidae	Cuniculus	paca	Cuniculus paca	M-L	Fotocolecta CONANP	CM	2014	Santiago Jocotepec	1	TRF
Rodentia	Cuniculidae	Cuniculus	paca	Cuniculus paca	M-L	Fotocolecta CONANP	CM	2014	Santiago Jocotepec	1	TRF
Rodentia	Cuniculidae	Cuniculus	paca	Cuniculus paca	M-L	Fotocolecta CONANP	CM	2014	Santiago Jocotepec	1	TRF
Rodentia	Cuniculidae	Cuniculus	paca	Cuniculus paca	M-L	Fotocolecta CONANP	CM	2014	Santiago Jocotepec	1	TRF
Rodentia	Cuniculidae	Cuniculus	paca	Cuniculus paca	M-L	Fotocolecta CONANP	CM	2014	Santiago Jocotepec	1	TRF
Rodentia	Cuniculidae	Cuniculus	paca	Cuniculus paca	M-L	Fotocolecta CONANP	CM	2014	Santiago Jocotepec	1	TRF
Rodentia	Cuniculidae	Cuniculus	paca	Cuniculus paca	M-L	Fotocolecta CONANP	CM	2014	Santiago Jocotepec	1	TRF
Rodentia	Cuniculidae	Cuniculus	paca	Cuniculus paca	M-L	Video CONANP	CM	2014	San Felipe Usila	2	TRF
Rodentia	Cuniculidae	Cuniculus	paca	Cuniculus paca	M-L	Video CONANP	CM	2014	San Felipe Usila	2	TRF
Rodentia	Cuniculidae	Cuniculus	paca	Cuniculus paca	M-L	Video CONANP	CM	2014	San Felipe Usila	2	TRF
Rodentia	Cuniculidae	Cuniculus	paca	Cuniculus paca	M-L	Video CONANP	CM	2014	San Felipe Usila	2	TRF
Rodentia	Cuniculidae	Cuniculus	paca	Cuniculus paca	M-L	Video CONANP	CM	2014	San Felipe Usila	2	TRF
Rodentia	Cuniculidae	Cuniculus	paca	Cuniculus paca	M-L	Video CONANP	CM	2012	San Juan Bautista Valle Nacional	2	TRF
Rodentia	Cuniculidae	Cuniculus	paca	Cuniculus paca	M-L	Video CONANP	CM	2012	San Juan Bautista Valle Nacional	2	TRF
Rodentia	Cuniculidae	Cuniculus	paca	Cuniculus paca	M-L	Video CONANP	CM	2012	San Juan Bautista Valle Nacional	2	TRF
Rodentia	Cuniculidae	Cuniculus	paca	Cuniculus paca	M-L	Video CONANP	CM	2012	San Juan Bautista Valle Nacional	2	TRF
Rodentia	Cuniculidae	Cuniculus	paca	Cuniculus paca	M-L	Video CONANP	CM	2012	San Juan Bautista Valle Nacional	2	TRF
Rodentia	Cuniculidae	Cuniculus	paca	Cuniculus paca	M-L	Video CONANP	CM	2012	San Juan Bautista Valle Nacional	2	TRF
Rodentia	Cuniculidae	Cuniculus	paca	Cuniculus paca	M-L	Video CONANP	CM	2012	San Juan Bautista Valle Nacional	2	TRF
Rodentia	Cuniculidae	Cuniculus	paca	Cuniculus paca	M-L	Video CONANP	CM	2012	San Juan Bautista Valle Nacional	2	TRF
Rodentia	Cuniculidae	Cuniculus	paca	Cuniculus paca	M-L	Video CONANP	CM	2012	San Juan Bautista Valle Nacional	2	TRF
Rodentia	Cuniculidae	Cuniculus	paca	Cuniculus paca	M-L	Video CONANP	CM	2012	San Juan Bautista Valle Nacional	2	TRF
Rodentia	Cuniculidae	Cuniculus	paca	Cuniculus paca	M-L	Video CONANP	CM	2013	San Juan Bautista Valle Nacional	1	TRF
Rodentia	Cuniculidae	Cuniculus	paca	Cuniculus paca	M-L	Video CONANP	CM	2013	San Juan Bautista Valle Nacional	1	TRF
Rodentia	Cuniculidae	Cuniculus	paca	Cuniculus paca	M-L	Video CONANP	CM	2013	San Juan Bautista Valle Nacional	1	TRF
Rodentia	Cuniculidae	Cuniculus	paca	Cuniculus paca	M-L	Video CONANP	CM	2013	San Juan Bautista Valle Nacional	2	TRF
Rodentia	Cuniculidae	Cuniculus	paca	Cuniculus paca	M-L	Video CONANP	CM	2013	San Juan Bautista Valle Nacional	2	TRF
Rodentia	Cuniculidae	Cuniculus	paca	Cuniculus paca	M-L	Video CONANP	CM	2014	San Juan Bautista Valle Nacional	2	TRF
Rodentia	Cuniculidae	Cuniculus	paca	Cuniculus paca	M-L	Video CONANP	CM	2014	San Juan Bautista Valle Nacional	2	TRF
Rodentia	Cuniculidae	Cuniculus	paca	Cuniculus paca	M-L	Video CONANP	CM	2014	San Juan Bautista Valle Nacional	2	TRF
Rodentia	Cuniculidae	Cuniculus	paca	Cuniculus paca	M-L	Video CONANP	CM	2014	San Juan Bautista Valle Nacional	2	TRF
Rodentia	Cuniculidae	Cuniculus	paca	Cuniculus paca	M-L	Video CONANP	CM	2012	Santiago Jocotepec	1	TRF
Rodentia	Cuniculidae	Cuniculus	paca	Cuniculus paca	M-L	Video CONANP	CM	2012	Santiago Jocotepec	1	TRF
Rodentia	Cuniculidae	Cuniculus	paca	Cuniculus paca	M-L	Video CONANP	CM	2012	Santiago Jocotepec	1	TRF
Rodentia	Cuniculidae	Cuniculus	paca	Cuniculus paca	M-L	Video CONANP	CM	2012	Santiago Jocotepec	1	TRF
Rodentia	Cuniculidae	Cuniculus	paca	Cuniculus paca	M-L	Video CONANP	CM	2012	Santiago Jocotepec	1	TRF
Rodentia	Cuniculidae	Cuniculus	paca	Cuniculus paca	M-L	Video CONANP	CM	2012	Santiago Jocotepec	1	TRF
Rodentia	Cuniculidae	Cuniculus	paca	Cuniculus paca	M-L	Video CONANP	CM	2012	Santiago Jocotepec	1	TRF
Rodentia	Cuniculidae	Cuniculus	paca	Cuniculus paca	M-L	Video CONANP	CM	2012	Santiago Jocotepec	1	TRF
Rodentia	Cuniculidae	Cuniculus	paca	Cuniculus paca	M-L	Video CONANP	CM	2012	Santiago Jocotepec	1	TRF
Rodentia	Cuniculidae	Cuniculus	paca	Cuniculus paca	M-L	Video CONANP	CM	2013	Santiago Jocotepec	1	TRF
Rodentia	Cuniculidae	Cuniculus	paca	Cuniculus paca	M-L	Video CONANP	CM	2013	Santiago Jocotepec	1	TRF
Rodentia	Cuniculidae	Cuniculus	paca	Cuniculus paca	M-L	Video CONANP	CM	2013	Santiago Jocotepec	1	TRF
Rodentia	Cuniculidae	Cuniculus	paca	Cuniculus paca	M-L	Video CONANP	CM	2013	Santiago Jocotepec	1	TRF
Rodentia	Cuniculidae	Cuniculus	paca	Cuniculus paca	M-L	Video CONANP	CM	2013	Santiago Jocotepec	1	TRF
Rodentia	Cuniculidae	Cuniculus	paca	Cuniculus paca	M-L	Video CONANP	CM	2013	Santiago Jocotepec	1	TRF
Rodentia	Cuniculidae	Cuniculus	paca	Cuniculus paca	M-L	Video CONANP	CM	2013	Santiago Jocotepec	1	TRF
Rodentia	Cuniculidae	Cuniculus	paca	Cuniculus paca	M-L	Video CONANP	CM	2013	Santiago Jocotepec	1	TRF
Rodentia	Cuniculidae	Cuniculus	paca	Cuniculus paca	M-L	Video CONANP	CM	2013	Santiago Jocotepec	1	TRF
Rodentia	Cuniculidae	Cuniculus	paca	Cuniculus paca	M-L	Video CONANP	CM	2013	Santiago Jocotepec	1	TRF
Rodentia	Cuniculidae	Cuniculus	paca	Cuniculus paca	M-L	Video CONANP	CM	2013	Santiago Jocotepec	1	TRF
Rodentia	Cuniculidae	Cuniculus	paca	Cuniculus paca	M-L	Video CONANP	CM	2013	Santiago Jocotepec	1	TRF
Rodentia	Cuniculidae	Cuniculus	paca	Cuniculus paca	M-L	Video CONANP	CM	2013	Santiago Jocotepec	1	TRF
Rodentia	Cuniculidae	Cuniculus	paca	Cuniculus paca	M-L	Video CONANP	CM	2013	Santiago Jocotepec	1	TRF
Rodentia	Cuniculidae	Cuniculus	paca	Cuniculus paca	M-L	Video CONANP	CM	2013	Santiago Jocotepec	1	TRF
Rodentia	Cuniculidae	Cuniculus	paca	Cuniculus paca	M-L	Video CONANP	CM	2013	Santiago Jocotepec	1	TRF
Rodentia	Cuniculidae	Cuniculus	paca	Cuniculus paca	M-L	Video CONANP	CM	2013	Santiago Jocotepec	1	TRF
Rodentia	Cuniculidae	Cuniculus	paca	Cuniculus paca	M-L	Video CONANP	CM	2013	Santiago Jocotepec	1	TRF
Rodentia	Cuniculidae	Cuniculus	paca	Cuniculus paca	M-L	Video CONANP	CM	2014	Santiago Jocotepec	1	TRF
Rodentia	Cuniculidae	Cuniculus	paca	Cuniculus paca	M-L	Video CONANP	CM	2014	Santiago Jocotepec	1	TRF
Rodentia	Cuniculidae	Cuniculus	paca	Cuniculus paca	M-L	Video CONANP	CM	2014	Santiago Jocotepec	1	TRF
Rodentia	Cuniculidae	Cuniculus	paca	Cuniculus paca	M-L	Video CONANP CONANP	CM	2013	San Juan Bautista Valle Nacional	2	TRF
Rodentia	Cuniculidae	Cuniculus	paca	Cuniculus paca	M-L	Video CONANP CONANP	CM	2013	San Juan Bautista Valle Nacional	2	TRF
Rodentia	Cuniculidae	Cuniculus	paca	Cuniculus paca	M-L	Video CONANP CONANP	CM	2013	San Juan Bautista Valle Nacional	2	TRF
Rodentia	Cuniculidae	Cuniculus	paca	Cuniculus paca	M-L	Video CONANP CONANP	CM	2013	Santiago Jocotepec	1	TRF
Rodentia	Cuniculidae	Cuniculus	paca	Cuniculus paca	M-L	Video CONANP CONANP	CM	2013	Santiago Jocotepec	1	TRF
Rodentia	Cuniculidae	Cuniculus	paca	Cuniculus paca	M-L	Video CONANP CONANP	CM	2013	Santiago Jocotepec	1	TRF
Rodentia	Cuniculidae	Cuniculus	paca	Cuniculus paca	M-L	Video CONANP CONANP	CM	2013	Santiago Jocotepec	1	TRF
Rodentia	Cuniculidae	Cuniculus	paca	Cuniculus paca	M-L	Video CONANP CONANP	CM	2013	Santiago Jocotepec	1	TRF
Rodentia	Dasyproctidae	Dasyprocta	mexicana	Dasyprocta mexicana	M-L	Fotocolecta CONANP	CM	2013	San Felipe Usila	2	TRF
Rodentia	Dasyproctidae	Dasyprocta	mexicana	Dasyprocta mexicana	M-L	Fotocolecta CONANP	CM	2013	San Felipe Usila	2	TRF
Rodentia	Dasyproctidae	Dasyprocta	mexicana	Dasyprocta mexicana	M-L	Fotocolecta CONANP	CM	2013	San Felipe Usila	2	TRF
Rodentia	Dasyproctidae	Dasyprocta	mexicana	Dasyprocta mexicana	M-L	Fotocolecta CONANP	CM	2013	San Felipe Usila	2	TRF
Rodentia	Dasyproctidae	Dasyprocta	mexicana	Dasyprocta mexicana	M-L	Fotocolecta CONANP	CM	2014	San Felipe Usila	2	TRF
Rodentia	Dasyproctidae	Dasyprocta	mexicana	Dasyprocta mexicana	M-L	Fotocolecta CONANP	CM	2014	San Felipe Usila	2	TRF
Rodentia	Dasyproctidae	Dasyprocta	mexicana	Dasyprocta mexicana	M-L	Fotocolecta CONANP	CM	2014	San Felipe Usila	2	TRF
Rodentia	Dasyproctidae	Dasyprocta	mexicana	Dasyprocta mexicana	M-L	Fotocolecta CONANP	CM	2014	San Felipe Usila	2	TRF
Rodentia	Dasyproctidae	Dasyprocta	mexicana	Dasyprocta mexicana	M-L	Fotocolecta CONANP	CM	2014	San Felipe Usila	2	TRF
Rodentia	Dasyproctidae	Dasyprocta	mexicana	Dasyprocta mexicana	M-L	Fotocolecta CONANP	CM	2014	San Felipe Usila	2	TRF
Rodentia	Dasyproctidae	Dasyprocta	mexicana	Dasyprocta mexicana	M-L	Fotocolecta CONANP	CM	2014	San Felipe Usila	2	TRF
Rodentia	Dasyproctidae	Dasyprocta	mexicana	Dasyprocta mexicana	M-L	Fotocolecta CONANP	CM	2014	San Felipe Usila	2	TRF
Rodentia	Dasyproctidae	Dasyprocta	mexicana	Dasyprocta mexicana	M-L	Fotocolecta CONANP	CM	2014	San Felipe Usila	2	TRF
Rodentia	Dasyproctidae	Dasyprocta	mexicana	Dasyprocta mexicana	M-L	Fotocolecta CONANP	CM	2014	San Felipe Usila	2	TRF
Rodentia	Dasyproctidae	Dasyprocta	mexicana	Dasyprocta mexicana	M-L	Fotocolecta CONANP	CM	2014	San Felipe Usila	2	TRF
Rodentia	Dasyproctidae	Dasyprocta	mexicana	Dasyprocta mexicana	M-L	Fotocolecta CONANP	CM	2014	San Felipe Usila	2	TRF
Rodentia	Dasyproctidae	Dasyprocta	mexicana	Dasyprocta mexicana	M-L	Fotocolecta CONANP	CM	2014	San Felipe Usila	2	TRF
Rodentia	Dasyproctidae	Dasyprocta	mexicana	Dasyprocta mexicana	M-L	Fotocolecta CONANP	CM	2014	San José Chiltepec	1	TRF
[truncated: 1,443 more rows]
